# Supplementary material
Source: MDPI journal article supplement (https://www.mdpi.com/2304-6740/10/12/246)
Supplement: s1 [file s1 › inorganics-1994143-supplementary.pdf]

# Organoselenocyanates tethered methyl anthranilate hybrids with promising anticancer, antimicrobial, and antioxidant activities

Batool Al-Abdallah<sup>1</sup>, Yasair S. Al-Faiyz<sup>1</sup>, Saad Shaaban<sup>1,2\*</sup>

<sup>1</sup> Chemistry Department, College of Science, King Faisal University, Al-Ahsa 31982, Saudi Arabia.

<sup>2</sup> Chemistry Department, Faculty of Science, Mansoura University, Mansoura, Egypt.

\* Correspondence: sbrahim@kfu.edu.sa; dr\_saad\_chem@mans.edu.sa

| SUPPORTING INFORMATION                                          | PAGE |
|-----------------------------------------------------------------|------|
| The biological assays                                           | S2   |
| Copies of <sup>1</sup> H & <sup>13</sup> CNMR spectra IR and MS | S6   |

## **1.1. The biological assays**

### **1.1.1. The anticancer activity**

The breast adenocarcinoma (MCF-7), Hepatocellular carcinoma (HEPG-2), and normal fibroblast (WI-38) cells were obtained from ATCC via Holding company for biological products and vaccines (VACSERA), Cairo, Egypt. The reagents RPMI-1640 medium, MTT, DMSO, and fetal bovine serum was obtained from Sigma Aldrich. Dulbecco's modified Eagle's medium was used as the culture medium for the cells, and the cytotoxicity was evaluated using the reported MTT assay. Doxorubicin was used as the positive reference, and the IC<sub>50</sub> values were obtained from the corresponding dose-response curve.

#### **MTT assay[1-3]**

This colorimetric assay is based on converting the yellow tetrazolium bromide (MTT) to a purple formazan derivative by mitochondrial succinate dehydrogenase in viable cells. Cell lines were cultured in RPMI-1640 medium with 10% fetal bovine serum. Antibiotics added were 100 units/ml penicillin and 100µg/ml streptomycin at 37 C in a 5% CO<sub>2</sub> incubator. The cell lines were seeded in a 96-well plate at a density of  $1.0 \times 10^4$  cells/well. at 37 C for 48 h under 5% CO<sub>2</sub>. After incubation, the cells were treated with different concentrations of compounds and incubated for 24 h. After 24 h of drug treatment, 20 µl of MTT solution at 5mg/ml was added and incubated for 4 h. Finally, dimethyl sulfoxide (DMSO) in the volume of 100 µl is added to each well to dissolve the purple formazan formed. The colorimetric assay is measured and recorded at an absorbance of 570 nm using a plate reader (EXL 800, USA). The percentage of the relative cell viability was calculated as (A<sub>570</sub> of treated samples/A<sub>570</sub> of the untreated sample) X 100.

### **1.1.2. The antimicrobial activity**

The antimicrobial activities of the OSe compounds were evaluated against *C. albicans* yeast as well as *E. coli* gram-negative and *S. aureus* gram-positive bacteria employing the agar well diffusion assay [4].

Briefly, a concentration of 1 mM was prepared for each compound by dissolving in DMSO. Paper discs of standard size (5cm) were sterilized in an autoclave and soaked in 20  $\mu$ L of the test compounds, and placed in the Petri dishes, which in turn contain a nutrient media (agar 20 g, peptone 5 g, and beef extract 3 g) seeded with the dedicated strain. Incubation lasted for 24 h at 36  $^{\circ}$ C. Experiments were replicated three times and the antifungal clotrimazole and antibiotic ampicillin were used as standards. The % activity index for the complex was determined and depicted in table 2.

### **1.1.3. The antioxidant activity**

#### **1.1.3.1. The DPPH bioassay**

The hydrogen atom or electron donation ability of the corresponding compounds was measured by estimating the bleaching of the purple color of a methanolic solution of DPPH [5]. This spectrophotometric assay uses stable DPPH reagent. The sample was prepared by adding 200  $\mu$ L of the OSe compounds (1 mM in methanol) to 400  $\mu$ L DPPH in methanol. After 30 min of incubation in the dark, the absorbance was read against a blank at 517 nm. Ascorbic acid (vitamin C) and ebselen were used as standard antioxidants (positive control). A blank sample was run without DPPH. A negative control sample was run using methanol instead of the sample. The radical scavenging activity was calculated

using the following equation:

$$\text{Inhibition\%} = (A_{\text{blank}} - A_{\text{sample}}) / (A_{\text{blank}}) * 100.$$

#### **1.1.3.2. The ABTS bioassay**

The antioxidant activity of the investigated compounds was assessed using 2,2'-azino-bis(3-ethylbenzothiazoline-6-sulphonic acid (ABTS) method [6]. The radical cation derived from ABTS was prepared by the reaction of 60 mM ABTS solution with 0.3 M manganese dioxide solution in 0.1M phosphate buffer, pH 7. Then, the mixture was shaken, centrifuged, filtered, and the absorbance ( $A_{\text{control}}$ ) of the resulting green-blue solution (ABTS radical solution) was measured at wavelength 734 nm. Then,

50 mL of 1 mg/ml test compound in phosphate-buffered methanol was added. The absorbance ( $A_{\text{test}}$ ) was measured. The reduction in color intensity was expressed as % inhibition. The % inhibition for each compound is calculated from the following equation

$$\text{Inhibition\%} = (A_{\text{control}} - A_{\text{sample}}) / (A_{\text{control}}) * 100$$

Ascorbic acid (vitamin C) was used as a standard antioxidant (positive control). A blank sample was run without ABTS and using MeOH/phosphate buffer (1:1) instead of the sample. A negative control sample was run with MeOH/phosphate buffer (1:1) instead of a tested compound.

2-(2-(dicyanomethylene) hydrazinyl)-5-selenocyanatobenzoic acid (**3**).

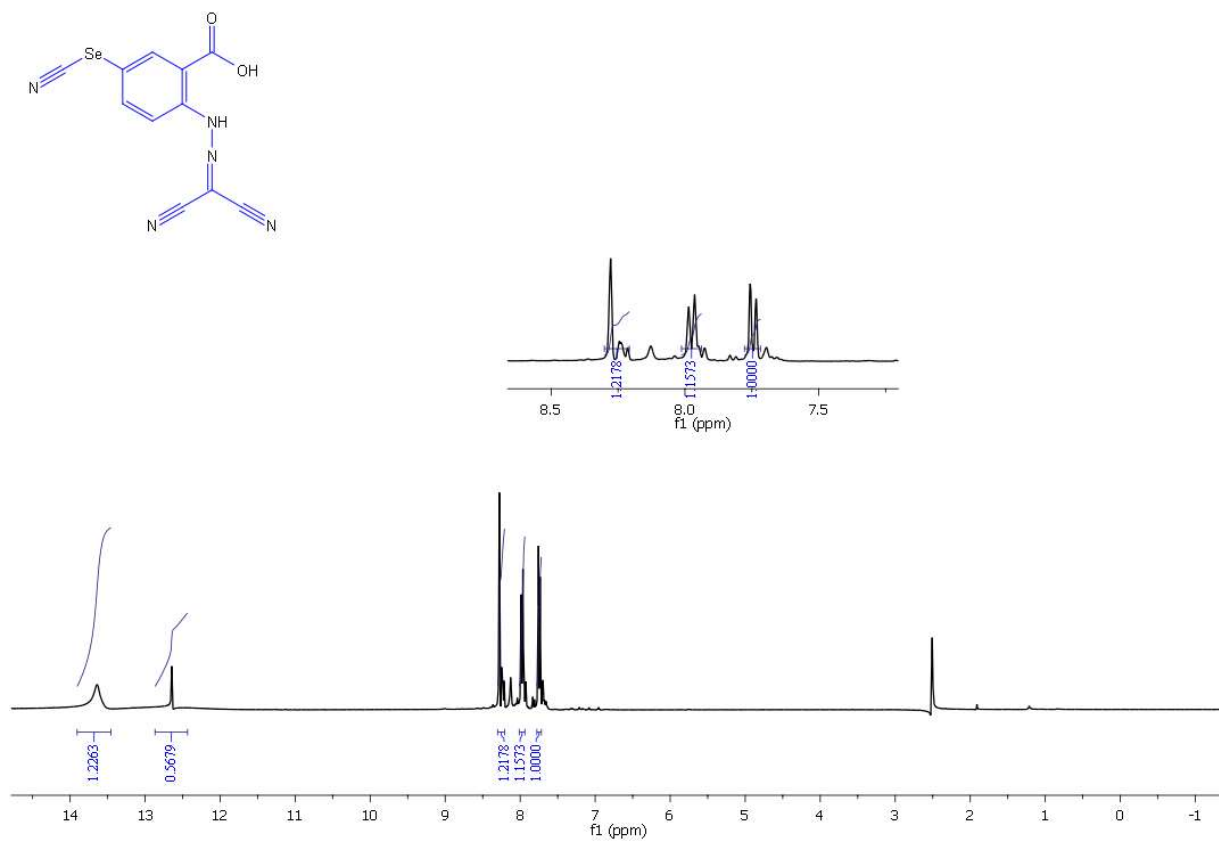

<sup>1</sup>H NMR chart of compound **3**

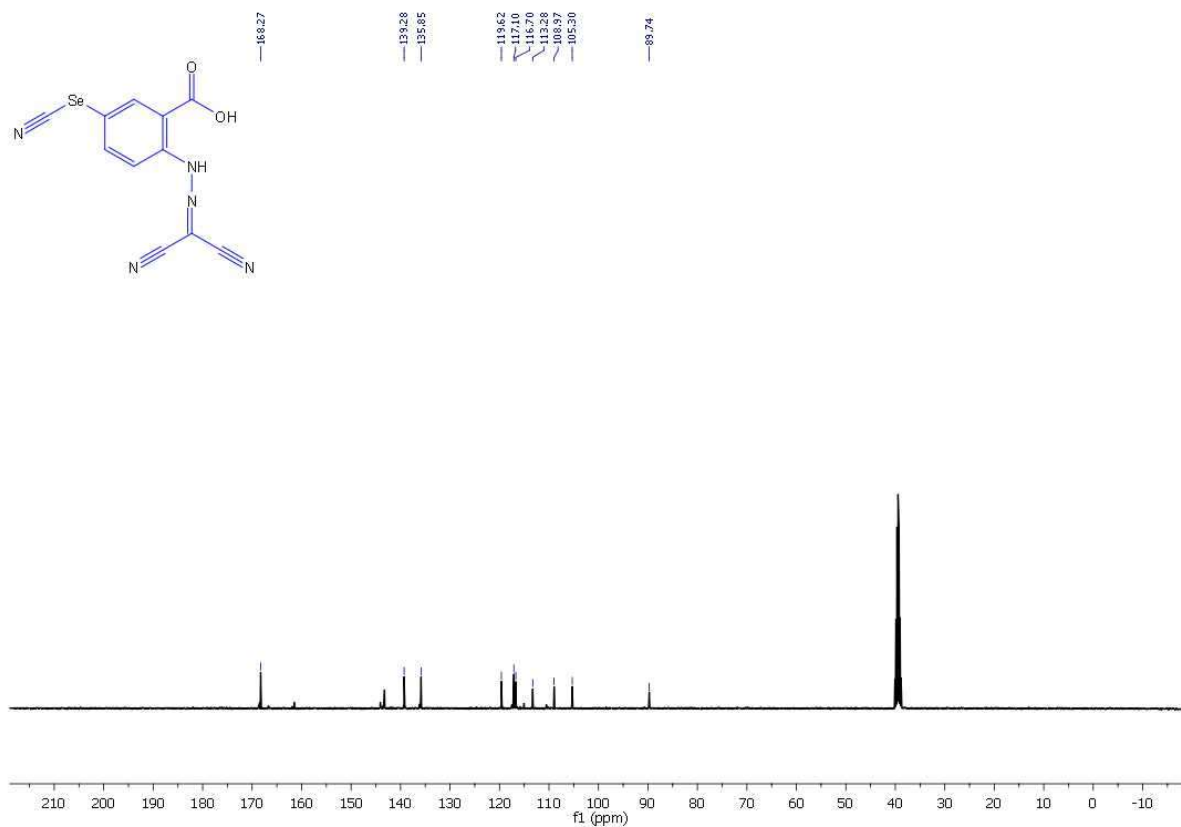

<sup>13</sup>CNMR chart of compound 3

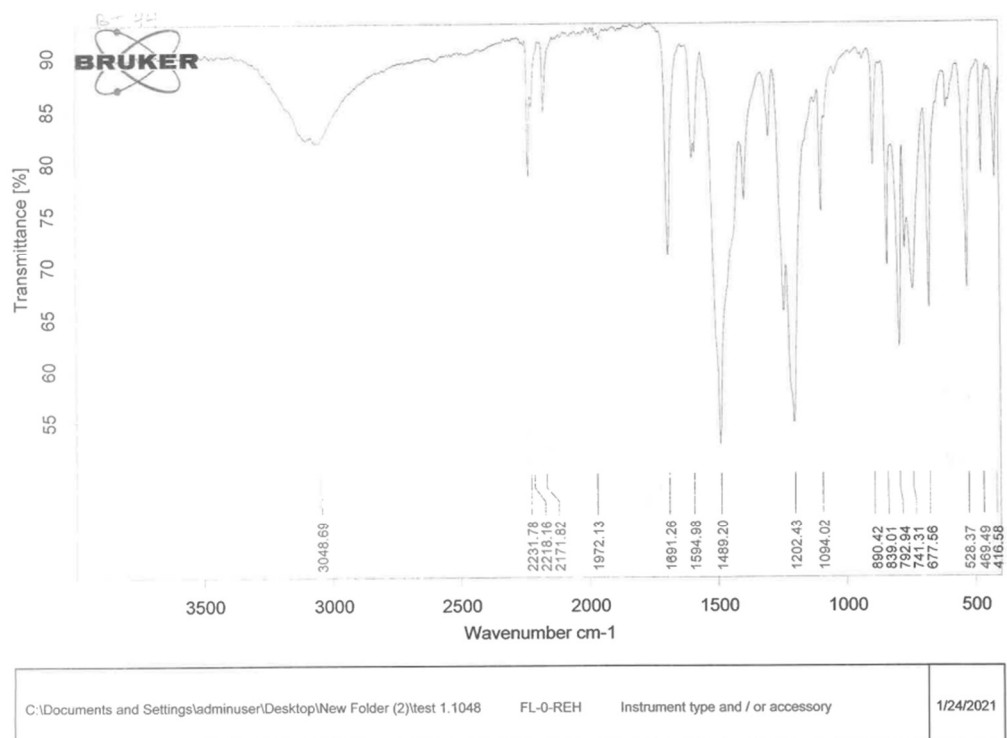

IR chart of compound 3

# Cairo University Micro Analytical Center

## DI Analysis Shimadzu Qp-2010 Plus

Sample Information  
 Analyzed by: Dr. Mai Younis  
 Analyzed: 03/01/2007 06:15:24  
 Sample Name: B10  
 Sample ID:  
 Customer Name: Dr. Mohamed Soliman - Science - Cairo  
 Data File: C:\GCMSolution\Data\Project1\B10.QGD  
 Org. Data File: C:\GCMSolution\Data\Project1\B10.QGD  
 Method File: C:\GCMSolution\Data\Project1\High Temperature Op  
 Org. Method File: C:\GCMSolution\Data\Project1\High Temperature Op  
 Report File:  
 Tuning File: C:\GCMSolution\System1\Tune1\_default.gct  
 Modified by: Dr. Mai Younis  
 Modified: 03/01/2007 06:20:41

Method  
 Analytical Line 1  
 IonSourceTemp: 250.00 °C  
 [MS Table]  
 --Group 1 - Event 1--  
 Start Time: 0.00min  
 End Time: 10.00min  
 ACQ Mode: Scan  
 Event Time: 0.50sec  
 Scan Speed: 1000  
 Start m/z: 50.00  
 End m/z: 510.00  
 Electron Voltage: 70 eV  
 Ionization Mode: EI

C:\GCMSolution\Data\Project1\B10.QGD

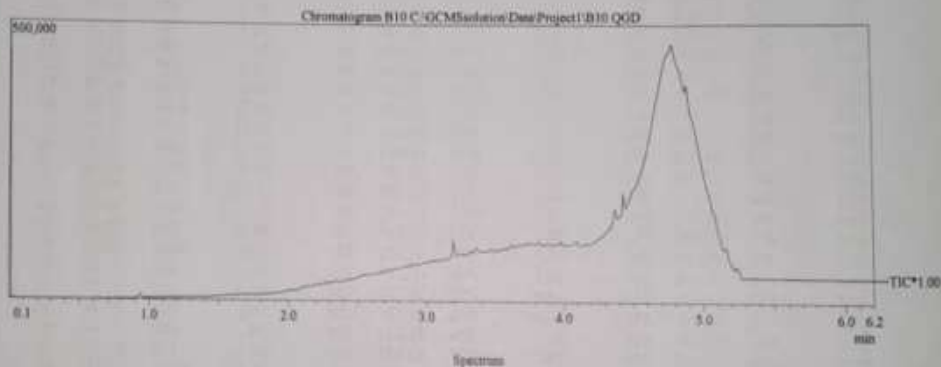

Line# 1 R.Time 4.8(Scan# 580)  
 MassPeak: 166  
 RawMode: Single 4.8(580) BasePeak: 63(34076)  
 BG Mode: None Group 1 - Event 1

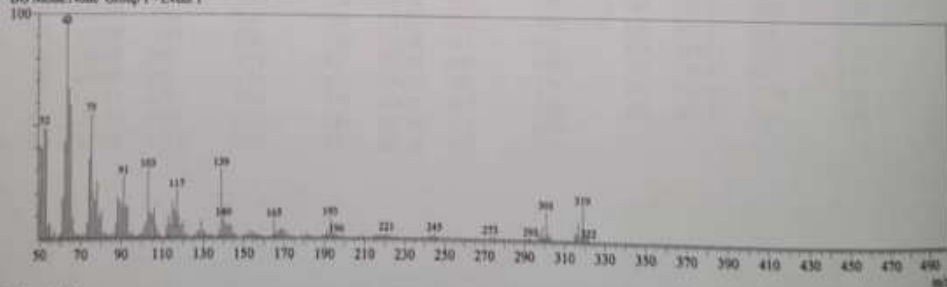

Mass Table  
 Line# 1 R.Time: 4.8(Scan# 580)  
 MassPeak: 166  
 RawMode: Single 4.8(580) BasePeak: 63(34076)  
 BG Mode: None Group 1 - Event 1

| # | m/z   | Abs. In | Rel. Int. | # | m/z   | Abs. In | Rel. Int. | # | m/z   | Abs. In | Rel. Int. |
|---|-------|---------|-----------|---|-------|---------|-----------|---|-------|---------|-----------|
| 1 | 50.05 | 13956   | 40.96     | 4 | 53.05 | 16402   | 48.13     | 7 | 56.15 | 461     | 1.35      |
| 2 | 51.05 | 13588   | 39.88     | 5 | 54.05 | 2216    | 6.50      | 8 | 57.10 | 1052    | 3.09      |
| 3 | 52.05 | 16899   | 49.59     | 6 | 55.05 | 2039    | 5.98      | 9 | 59.05 | 587     | 1.72      |

Mass chart of compound 3

| #  | m/z    | Abs. In | Rel. Int. | #   | m/z    | Abs. In | Rel. Int. | #   | m/z    | Abs. In | Rel. Int. |
|----|--------|---------|-----------|-----|--------|---------|-----------|-----|--------|---------|-----------|
| 10 | 60.15  | 961     | 2.82      | 63  | 114.05 | 2044    | 6.00      | 116 | 189.10 | 404     | 1.19      |
| 11 | 61.05  | 6212    | 18.23     | 64  | 115.05 | 5425    | 15.92     | 117 | 190.10 | 457     | 1.34      |
| 12 | 62.10  | 14762   | 43.32     | 65  | 116.10 | 4161    | 12.21     | 118 | 191.05 | 979     | 2.87      |
| 13 | 63.05  | 34076   | 100.00    | 66  | 117.05 | 7201    | 21.13     | 119 | 192.15 | 578     | 1.70      |
| 14 | 64.05  | 22773   | 66.83     | 67  | 118.05 | 3355    | 9.85      | 120 | 193.05 | 3024    | 8.87      |
| 15 | 65.05  | 20118   | 59.04     | 68  | 119.05 | 1789    | 5.25      | 121 | 194.00 | 558     | 1.64      |
| 16 | 66.05  | 3100    | 9.10      | 69  | 120.10 | 2447    | 7.18      | 122 | 195.05 | 647     | 1.90      |
| 17 | 67.05  | 977     | 2.87      | 70  | 121.00 | 410     | 1.20      | 123 | 196.15 | 449     | 1.32      |
| 18 | 68.10  | 566     | 1.66      | 71  | 122.05 | 798     | 2.34      | 124 | 197.10 | 218     | 0.64      |
| 19 | 69.10  | 730     | 2.20      | 72  | 125.00 | 239     | 0.70      | 125 | 198.10 | 238     | 0.70      |
| 20 | 70.10  | 359     | 1.05      | 73  | 126.05 | 449     | 1.32      | 126 | 199.10 | 350     | 1.03      |
| 21 | 71.10  | 762     | 2.24      | 74  | 127.10 | 985     | 2.89      | 127 | 207.10 | 236     | 0.69      |
| 22 | 72.15  | 534     | 1.57      | 75  | 128.10 | 951     | 2.79      | 128 | 209.10 | 329     | 0.97      |
| 23 | 73.15  | 2432    | 7.14      | 76  | 129.10 | 2607    | 7.65      | 129 | 214.10 | 233     | 0.68      |
| 24 | 74.10  | 12095   | 35.49     | 77  | 130.05 | 1338    | 3.93      | 130 | 215.10 | 358     | 1.05      |
| 25 | 75.05  | 18860   | 55.35     | 78  | 131.10 | 734     | 2.15      | 131 | 216.10 | 378     | 1.11      |
| 26 | 76.05  | 6964    | 20.44     | 79  | 132.10 | 446     | 1.31      | 132 | 217.10 | 319     | 0.94      |
| 27 | 77.05  | 5786    | 16.98     | 80  | 133.15 | 327     | 0.96      | 133 | 218.00 | 628     | 1.84      |
| 28 | 78.05  | 8451    | 24.80     | 81  | 134.10 | 455     | 1.34      | 134 | 219.05 | 446     | 1.31      |
| 29 | 79.05  | 3241    | 9.51      | 82  | 135.10 | 204     | 0.60      | 135 | 220.00 | 322     | 0.94      |
| 30 | 79.95  | 4069    | 11.94     | 83  | 137.10 | 279     | 0.82      | 136 | 221.00 | 817     | 2.40      |
| 31 | 81.05  | 950     | 2.79      | 84  | 138.15 | 1179    | 3.46      | 137 | 222.00 | 273     | 0.80      |
| 32 | 82.00  | 817     | 2.40      | 85  | 139.10 | 10457   | 30.69     | 138 | 223.00 | 212     | 0.62      |
| 33 | 83.10  | 578     | 1.70      | 86  | 140.10 | 2862    | 8.40      | 139 | 224.00 | 252     | 0.74      |
| 34 | 84.15  | 427     | 1.25      | 87  | 141.10 | 1970    | 5.78      | 140 | 226.00 | 316     | 0.93      |
| 35 | 85.15  | 489     | 1.44      | 88  | 142.05 | 1871    | 5.49      | 141 | 242.00 | 273     | 0.80      |
| 36 | 86.10  | 714     | 2.10      | 89  | 143.05 | 1986    | 5.83      | 142 | 243.05 | 380     | 1.12      |
| 37 | 87.10  | 2108    | 6.19      | 90  | 144.05 | 1654    | 4.85      | 143 | 244.00 | 287     | 0.84      |
| 38 | 88.10  | 6418    | 18.83     | 91  | 145.05 | 616     | 1.81      | 144 | 245.00 | 814     | 2.39      |
| 39 | 89.10  | 5721    | 16.79     | 92  | 146.05 | 552     | 1.62      | 145 | 246.00 | 210     | 0.62      |
| 40 | 90.10  | 4969    | 14.58     | 93  | 150.10 | 273     | 0.80      | 146 | 247.00 | 215     | 0.63      |
| 41 | 91.05  | 9289    | 27.26     | 94  | 151.05 | 381     | 1.12      | 147 | 273.10 | 498     | 1.46      |
| 42 | 92.05  | 4680    | 13.73     | 95  | 152.15 | 417     | 1.22      | 148 | 275.15 | 468     | 1.37      |
| 43 | 93.00  | 4826    | 14.16     | 96  | 153.10 | 1052    | 3.09      | 149 | 291.20 | 207     | 0.61      |
| 44 | 94.05  | 634     | 1.86      | 97  | 154.05 | 674     | 1.98      | 150 | 292.20 | 238     | 0.70      |
| 45 | 95.05  | 1046    | 3.07      | 98  | 155.10 | 790     | 2.32      | 151 | 293.20 | 295     | 0.87      |
| 46 | 96.10  | 303     | 0.89      | 99  | 156.20 | 486     | 1.43      | 152 | 297.15 | 941     | 2.76      |
| 47 | 97.10  | 321     | 0.94      | 100 | 157.20 | 295     | 0.87      | 153 | 298.15 | 975     | 2.86      |
| 48 | 98.10  | 343     | 1.01      | 101 | 158.20 | 265     | 0.78      | 154 | 299.15 | 2177    | 6.39      |
| 49 | 99.10  | 564     | 1.66      | 102 | 164.15 | 478     | 1.40      | 155 | 300.15 | 599     | 1.76      |
| 50 | 100.10 | 878     | 2.58      | 103 | 165.10 | 2705    | 7.94      | 156 | 301.15 | 4384    | 12.87     |
| 51 | 101.10 | 1774    | 5.21      | 104 | 166.00 | 788     | 2.31      | 157 | 302.10 | 823     | 2.42      |
| 52 | 102.15 | 2318    | 6.80      | 105 | 167.05 | 1020    | 2.99      | 158 | 303.10 | 866     | 2.54      |
| 53 | 103.10 | 10292   | 30.20     | 106 | 168.05 | 1213    | 3.56      | 159 | 315.15 | 1153    | 3.38      |
| 54 | 104.05 | 3866    | 11.35     | 107 | 169.05 | 1370    | 4.02      | 160 | 316.10 | 1126    | 3.30      |
| 55 | 105.05 | 3418    | 10.03     | 108 | 170.00 | 951     | 2.79      | 161 | 317.10 | 2886    | 8.47      |
| 56 | 106.00 | 4604    | 13.51     | 109 | 171.05 | 1051    | 3.08      | 162 | 318.15 | 708     | 2.08      |
| 57 | 107.00 | 1857    | 5.45      | 110 | 172.00 | 311     | 0.91      | 163 | 319.15 | 5256    | 15.42     |
| 58 | 108.00 | 940     | 2.76      | 111 | 173.00 | 234     | 0.69      | 164 | 320.05 | 1047    | 3.07      |
| 59 | 108.95 | 463     | 1.36      | 112 | 179.00 | 457     | 1.34      | 165 | 321.10 | 1230    | 3.61      |
| 60 | 111.15 | 347     | 1.02      | 113 | 181.05 | 662     | 1.94      | 166 | 322.10 | 314     | 0.92      |
| 61 | 112.15 | 1703    | 5.00      | 114 | 182.10 | 321     | 0.94      |     |        |         |           |
| 62 | 113.10 | 3310    | 9.71      | 115 | 183.10 | 255     | 0.75      |     |        |         |           |

Mass chart of compound 3

*2-(2-(1-cyano-2-ethoxy-2-oxoethylidene)hydrazinyl)-5-selenocyanatobenzoic acid (4).*

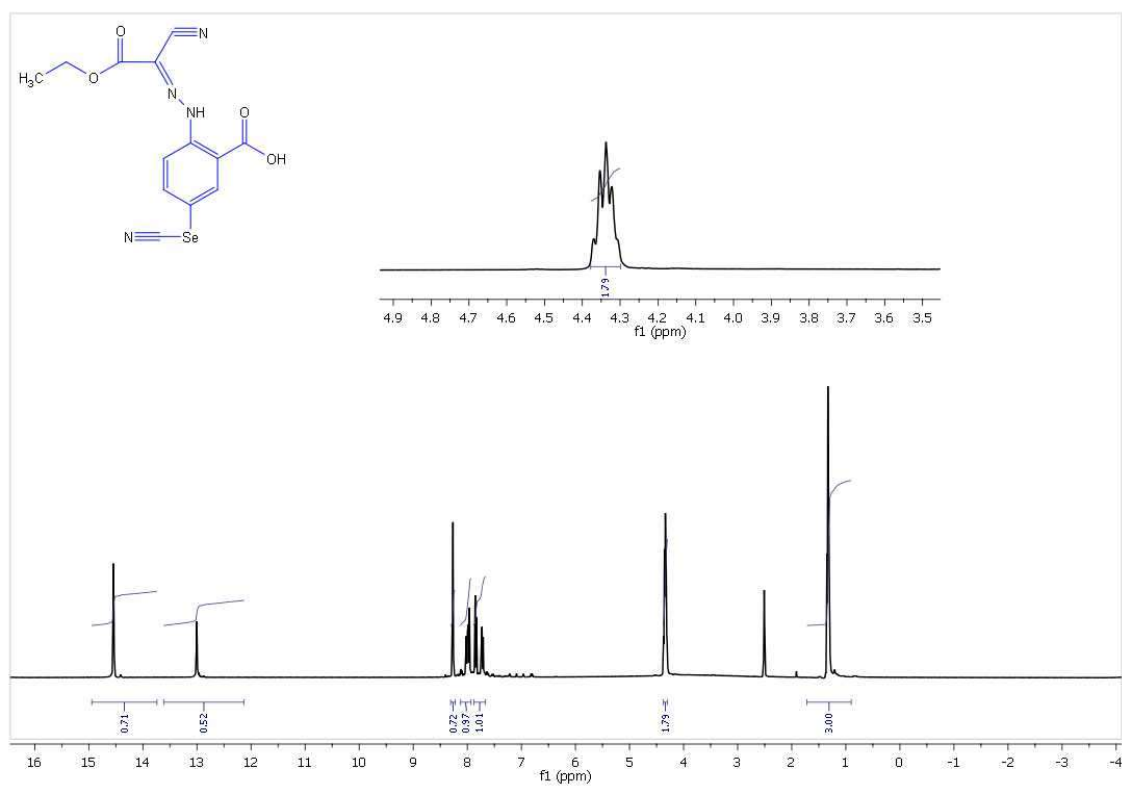

$^1\text{H}$ NMR chart of compound **4**

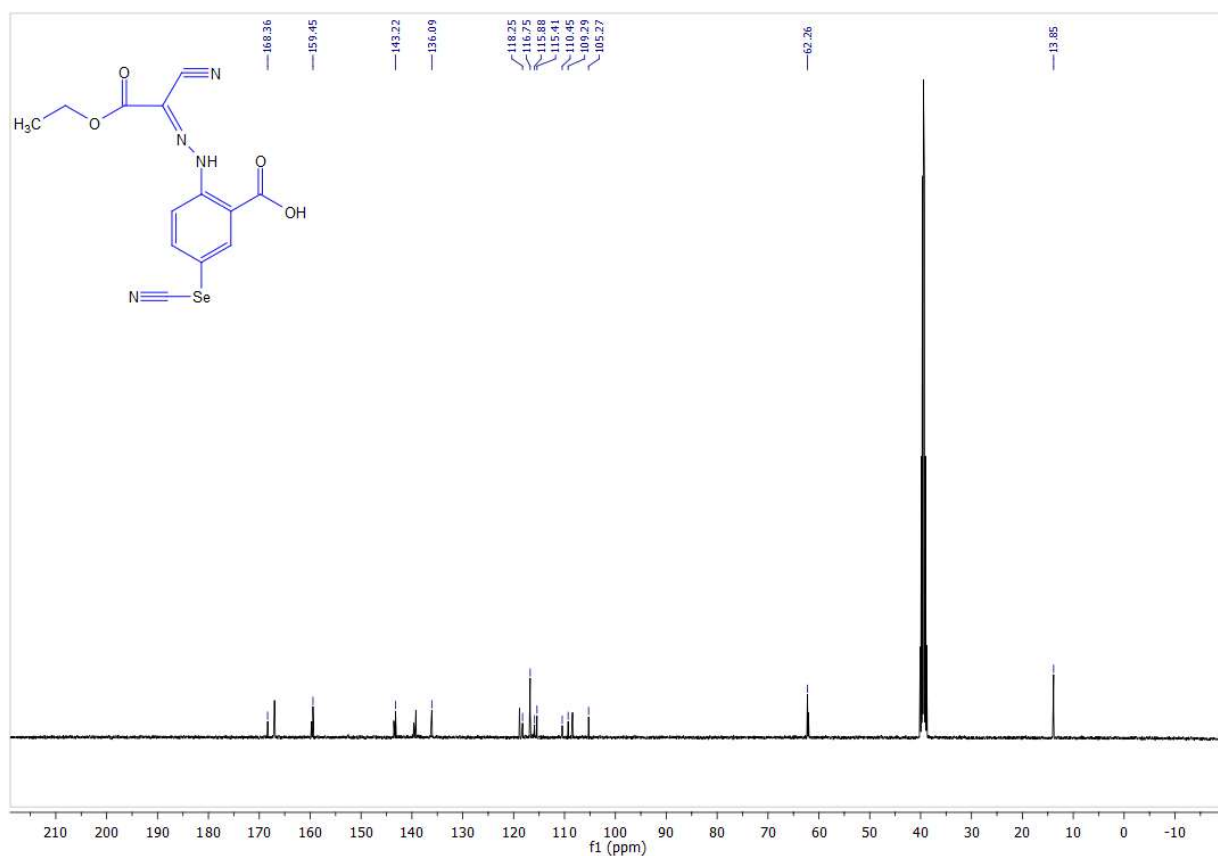

<sup>13</sup>CNMR chart of compound 4

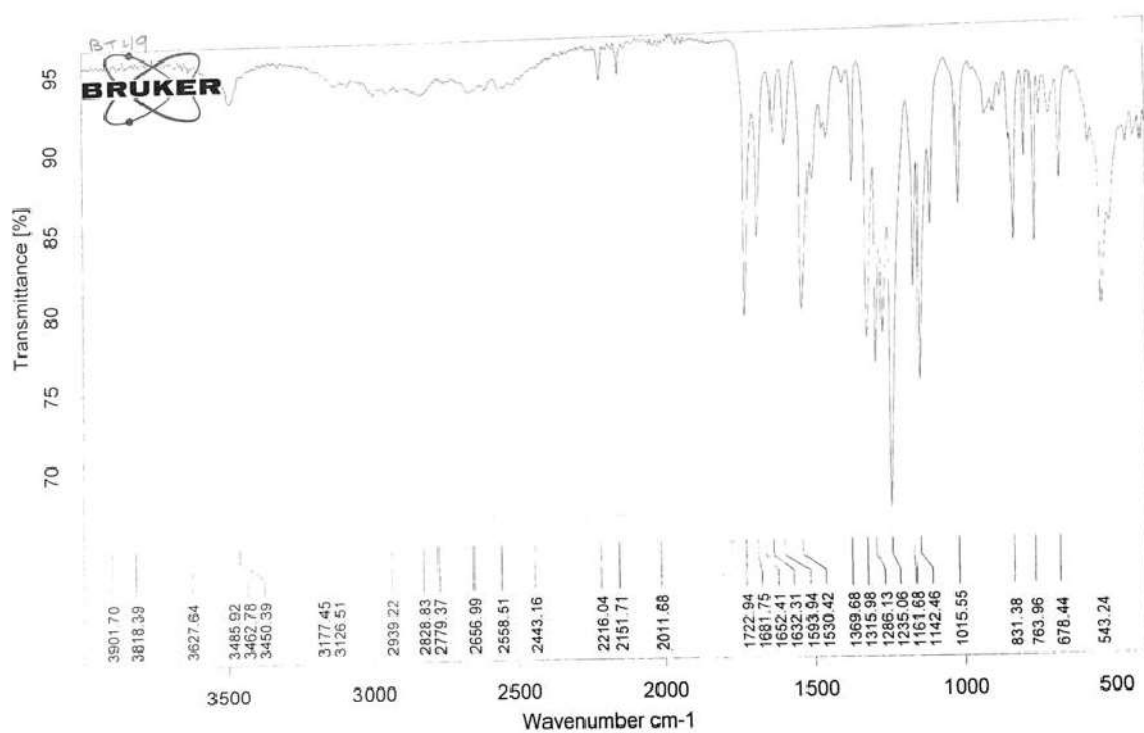

IR chart of compound 4

# Cairo University Micro Analytical Center

## DI Analysis Shimadzu Qp-2010 Plus

Sample Information  
 Analyzed by: Dr. Mai Younis  
 Analyzed: 06/01/2007 07:55:34  
 Sample Name: B11  
 Sample ID:  
 Customer Name: Dr. Mohamed Soliman - Science - Cairo  
 Data File: C:\GCMSolution\Data\Project1\B11.QGD  
 Orig Data File: C:\GCMSolution\Data\Project1\B11.QGD  
 Method File: C:\GCMSolution\Data\Project1\High Temperature Op  
 Orig Method File: C:\GCMSolution\Data\Project1\High Temperature Op  
 Report File:  
 Tuning File: C:\GCMSolution\System1\Tune1\_default.qgt  
 \$Endf\$Modified by: Dr. Mai Younis  
 Modified: 06/01/2007 08:01:25

### Method

Analytical Line 1  
 IonSourceTemp: 250.00 °C  
 [MS Table]  
 --Group 1 - Event 1--  
 Start Time: 0.00min  
 End Time: 10.00min  
 ACQ Mode: Scan  
 Event Time: 0.50sec  
 Scan Speed: 1000  
 Start m/z: 50.00  
 End m/z: 510.00  
 Electron Voltage: 70 eV  
 Ionization Mode: EI

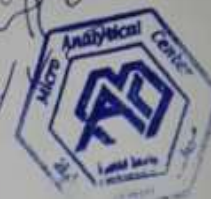

C:\GCMSolution\Data\Project1\B11.QGD

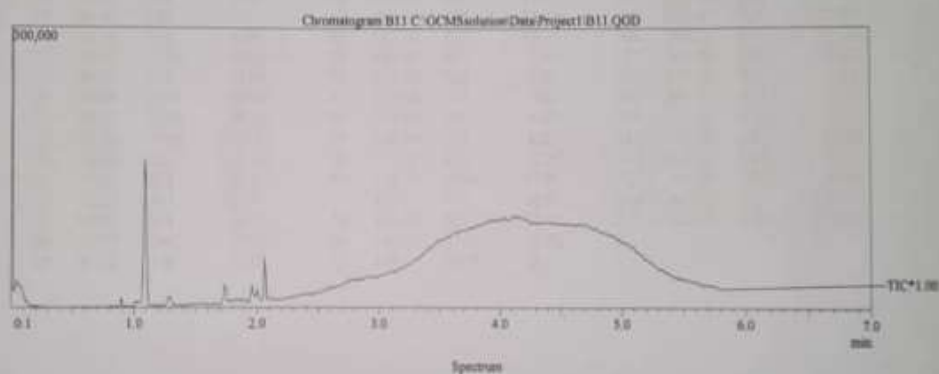

Line# 1 R.Time:3.7(Scan# 447)  
 MassPeaks:115  
 RawMode:Single 3.7(447) BasePeak:91(3748)  
 BG Mode:None Group 1 - Event 1

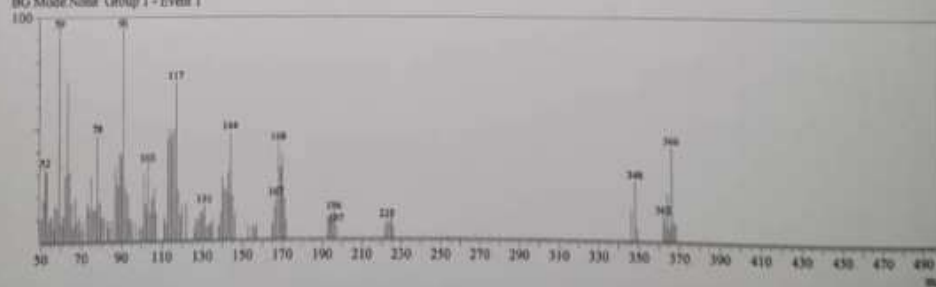

Mass Table  
 Line# 1 R.Time:3.7(Scan# 447)  
 MassPeaks:115  
 RawMode:Single 3.7(447) BasePeak:91(3748)  
 BG Mode:None Group 1 - Event 1

| # | m/z   | Abs. In | Rel. Int. | # | m/z   | Abs. In | Rel. Int. | # | m/z   | Abs. In | Rel. Int. |
|---|-------|---------|-----------|---|-------|---------|-----------|---|-------|---------|-----------|
| 1 | 49.95 | 385     | 10.27     | 4 | 52.95 | 1154    | 30.79     | 7 | 56.00 | 231     | 6.16      |
| 2 | 51.00 | 697     | 18.60     | 5 | 54.00 | 345     | 9.20      | 8 | 56.90 | 604     | 16.12     |
| 3 | 52.00 | 1220    | 32.55     | 6 | 55.00 | 431     | 11.50     | 9 | 58.05 | 552     | 14.73     |

# Mass chart of compound 4

06-Jan-07 20:02:36

| #  | m/z   | Abs. In | Rel. Int. | #  | m/z    | Abs. In | Rel. Int. | #   | m/z    | Abs. In | Rel. Int. |
|----|-------|---------|-----------|----|--------|---------|-----------|-----|--------|---------|-----------|
| 10 | 59.00 | 3676    | 98.08     | 46 | 100.10 | 217     | 5.79      | 82  | 145.10 | 726     | 19.37     |
| 11 | 60.00 | 311     | 8.30      | 47 | 101.10 | 1129    | 30.12     | 83  | 146.10 | 418     | 11.15     |
| 12 | 61.00 | 418     | 11.15     | 48 | 102.15 | 602     | 16.06     | 84  | 153.10 | 226     | 6.03      |
| 13 | 62.00 | 1098    | 29.30     | 49 | 103.05 | 1277    | 34.07     | 85  | 155.10 | 230     | 6.14      |
| 14 | 63.00 | 2641    | 70.46     | 50 | 104.15 | 460     | 12.27     | 86  | 156.10 | 204     | 5.44      |
| 15 | 63.95 | 1156    | 30.84     | 51 | 105.05 | 717     | 19.13     | 87  | 157.10 | 249     | 6.64      |
| 16 | 65.00 | 647     | 17.26     | 52 | 106.10 | 881     | 23.51     | 88  | 165.00 | 258     | 6.88      |
| 17 | 65.90 | 246     | 6.56      | 53 | 107.05 | 468     | 12.49     | 89  | 165.95 | 540     | 14.41     |
| 18 | 66.90 | 727     | 19.40     | 54 | 111.25 | 374     | 9.98      | 90  | 167.00 | 681     | 18.17     |
| 19 | 67.90 | 321     | 8.56      | 55 | 112.15 | 288     | 7.68      | 91  | 168.05 | 1616    | 43.12     |
| 20 | 69.00 | 415     | 11.07     | 56 | 113.10 | 1706    | 45.52     | 92  | 169.05 | 1192    | 31.80     |
| 21 | 70.00 | 204     | 5.44      | 57 | 114.10 | 1836    | 48.99     | 93  | 170.00 | 1399    | 37.33     |
| 22 | 71.10 | 329     | 8.78      | 58 | 115.05 | 1748    | 46.64     | 94  | 170.95 | 693     | 18.49     |
| 23 | 73.00 | 630     | 16.81     | 59 | 116.15 | 1876    | 50.05     | 95  | 171.90 | 302     | 8.06      |
| 24 | 73.95 | 551     | 14.70     | 60 | 117.10 | 2658    | 70.92     | 96  | 193.00 | 370     | 9.87      |
| 25 | 75.00 | 1081    | 28.84     | 61 | 118.10 | 830     | 22.15     | 97  | 194.00 | 260     | 6.94      |
| 26 | 76.00 | 537     | 14.33     | 62 | 119.10 | 425     | 11.34     | 98  | 195.05 | 375     | 10.01     |
| 27 | 77.05 | 514     | 13.71     | 63 | 120.05 | 597     | 15.93     | 99  | 195.95 | 438     | 11.69     |
| 28 | 78.00 | 1775    | 47.36     | 64 | 122.10 | 612     | 16.33     | 100 | 197.00 | 228     | 6.08      |
| 29 | 79.10 | 662     | 17.66     | 65 | 126.10 | 207     | 5.52      | 101 | 222.00 | 217     | 5.79      |
| 30 | 80.05 | 418     | 11.15     | 66 | 127.10 | 346     | 9.23      | 102 | 223.00 | 308     | 8.22      |
| 31 | 81.10 | 406     | 10.83     | 67 | 128.20 | 348     | 9.28      | 103 | 224.00 | 262     | 6.99      |
| 32 | 82.90 | 348     | 9.28      | 68 | 129.15 | 471     | 12.57     | 104 | 224.95 | 456     | 12.17     |
| 33 | 83.90 | 233     | 6.22      | 69 | 130.10 | 439     | 11.71     | 105 | 225.90 | 210     | 5.60      |
| 34 | 85.10 | 335     | 8.94      | 70 | 131.10 | 575     | 15.34     | 106 | 346.25 | 539     | 14.38     |
| 35 | 87.00 | 1238    | 33.03     | 71 | 132.10 | 217     | 5.79      | 107 | 348.20 | 999     | 26.65     |
| 36 | 88.05 | 934     | 24.92     | 72 | 133.10 | 262     | 6.99      | 108 | 349.20 | 206     | 5.50      |
| 37 | 89.00 | 1479    | 39.46     | 73 | 134.10 | 271     | 7.23      | 109 | 362.20 | 418     | 11.15     |
| 38 | 90.05 | 1434    | 38.26     | 74 | 135.10 | 345     | 9.20      | 110 | 363.20 | 265     | 7.07      |
| 39 | 91.00 | 3748    | 100.00    | 75 | 138.10 | 233     | 6.22      | 111 | 364.20 | 785     | 20.94     |
| 40 | 92.05 | 907     | 24.20     | 76 | 139.05 | 460     | 12.27     | 112 | 365.20 | 214     | 5.71      |
| 41 | 93.05 | 801     | 21.37     | 77 | 140.10 | 1049    | 27.99     | 113 | 366.25 | 1577    | 42.08     |
| 42 | 93.95 | 357     | 9.53      | 78 | 141.05 | 858     | 22.89     | 114 | 367.20 | 303     | 8.08      |
| 43 | 95.00 | 364     | 9.71      | 79 | 142.10 | 801     | 21.37     | 115 | 368.20 | 303     | 8.08      |
| 44 | 97.00 | 294     | 7.84      | 80 | 143.05 | 1123    | 29.96     |     |        |         |           |
| 45 | 99.00 | 226     | 6.03      | 81 | 144.10 | 1804    | 48.13     |     |        |         |           |

# Mass chart of compound 4

*Methyl 2-amino-5-selenocyanatobenzoate. (6).*

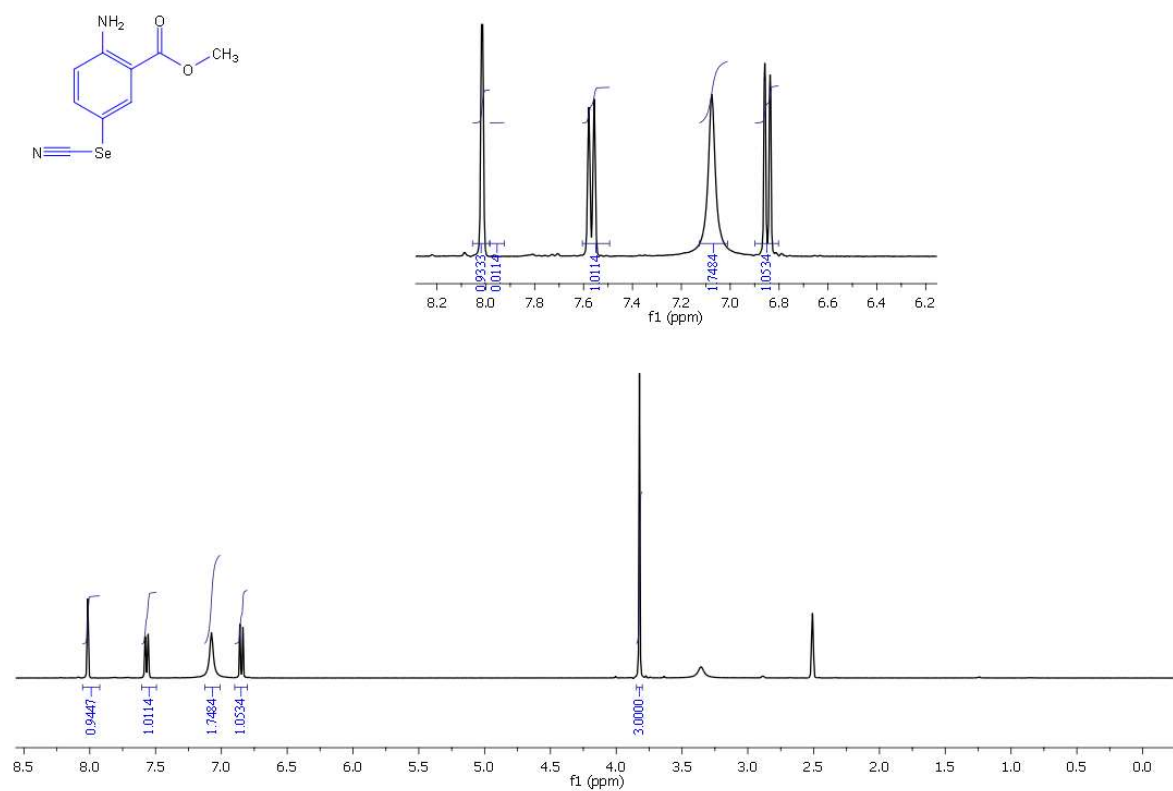

<sup>1</sup>H NMR chart of compound 6

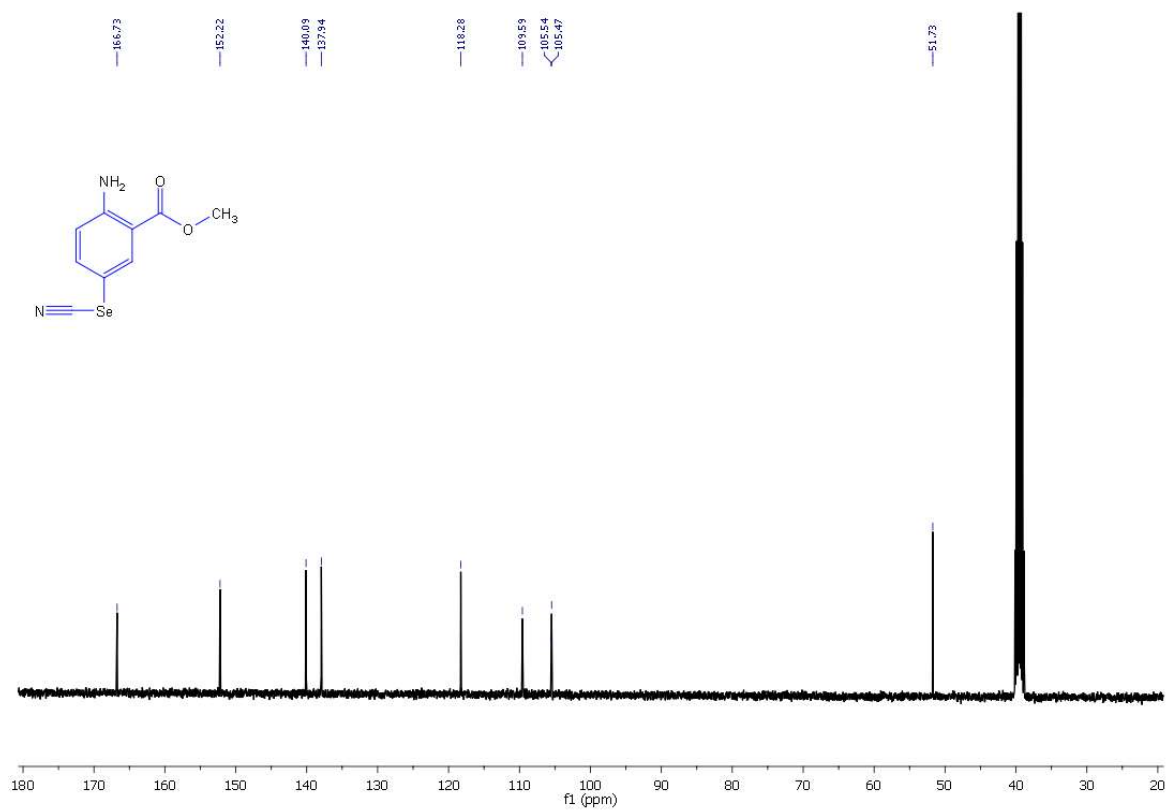

$^{13}\text{C}$ NMR chart of compound **6**

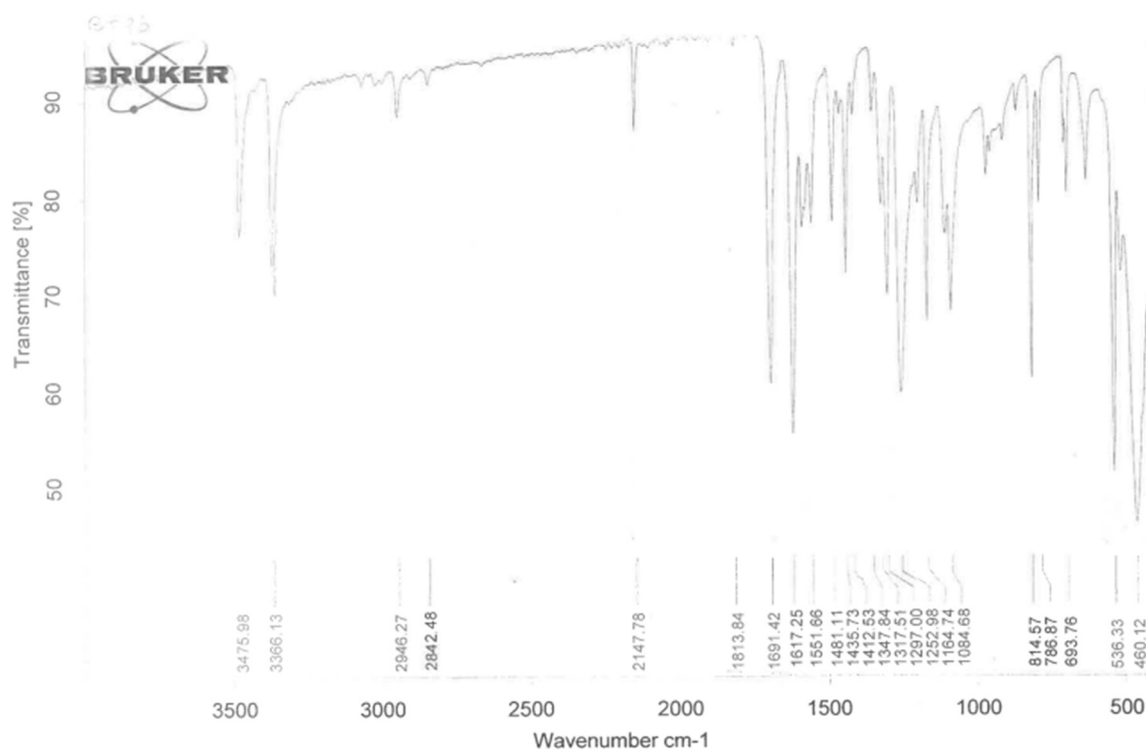

IR chart of compound **6**

# Cairo University Micro Analytical Center

## DI Analysis Shimadzu Qp-2010 Plus

**Analyzed by** Dr. Mai Younis  
**Analyzed** 06/01/2007 07:26:19  
**Sample Name** B2  
**Sample ID**  
**Customer Name** Dr. Mohamed Soliman - Science - Cairo  
**Data File** C:\OCMSolution\Data\Project1\B2.QGD  
**Org Data File** C:\OCMSolution\Data\Project1\B2.QGD  
**Method File** C:\OCMSolution\Data\Project1\High Temperature Op  
**Org Method File** C:\OCMSolution\Data\Project1\High Temperature Op  
**Report File**  
**Tuning File** C:\OCMSolution\System\Tune1\\_default.agt  
**EndOfModified by** Dr. Mai Younis  
**Modified** 06/01/2007 07:32:04

**Method**  
 Analytical List 1  
 IonSourceTemp 250.00 °C  
 [MS Table]  
 --Group 1 - Event 1--  
 Start Time 0.00min  
 End Time 10.00min  
 ACQ Mode Scan  
 Event Time 0.50sec  
 Scan Speed 1000  
 Start m/z 50.00  
 End m/z 510.00  
 Electron Voltage 70 eV  
 Ionization Mode EI

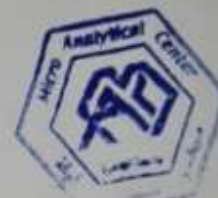

C:\OCMSolution\Data\Project1\B2.QGD

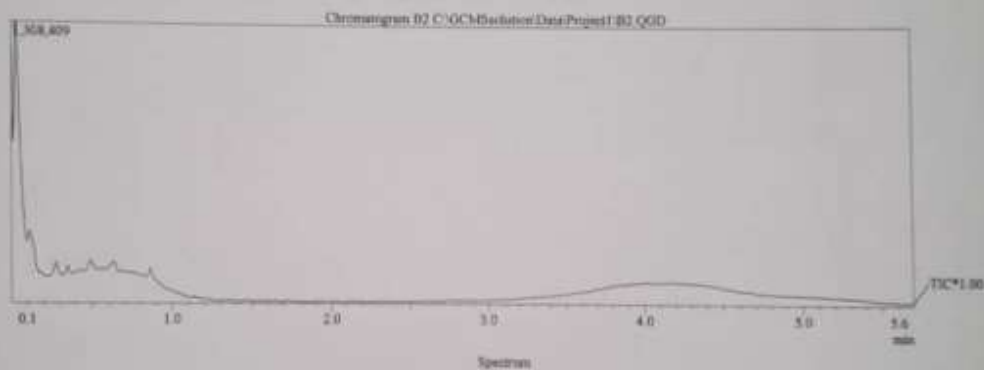

Line# 1 R.Time 4.1 (Scan# 490)  
 MassPeaks: 76  
 RawMode: Single 4.1 (490) BasePeak: 59 (21586)  
 BG Mode: None Group 1 - Event 1

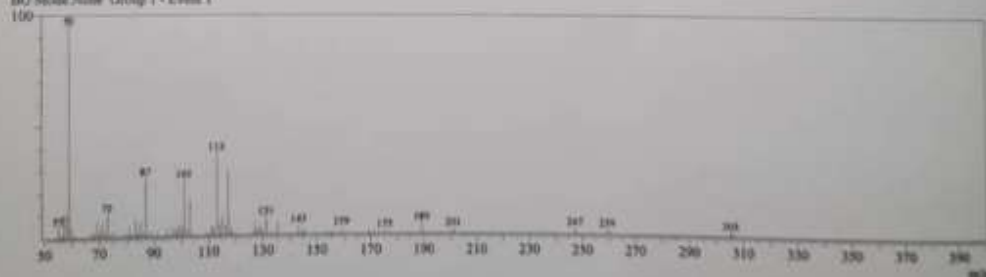

Mass Table  
 Line# 1 R.Time 4.1 (Scan# 490)  
 MassPeaks: 76  
 RawMode: Single 4.1 (490) BasePeak: 59 (21586)  
 BG Mode: None Group 1 - Event 1

| # | m/z   | Abs. Int. | Rel. Int. | # | m/z   | Abs. Int. | Rel. Int. | # | m/z   | Abs. Int. | Rel. Int. |
|---|-------|-----------|-----------|---|-------|-----------|-----------|---|-------|-----------|-----------|
| 1 | 55.05 | 1062      | 4.92      | 4 | 58.05 | 2312      | 10.71     | 7 | 61.00 | 236       | 1.09      |
| 2 | 56.05 | 354       | 1.64      | 5 | 59.00 | 21586     | 100.00    | 8 | 67.10 | 468       | 2.17      |
| 3 | 57.05 | 2418      | 11.20     | 6 | 59.95 | 1083      | 5.02      | 9 | 68.15 | 341       | 1.58      |

Mass chart of compound 6

| #  | m/z   | Abs. Int. | Rel. Int. | #  | m/z    | Abs. Int. | Rel. Int. | #  | m/z    | Abs. Int. | Rel. Int. |
|----|-------|-----------|-----------|----|--------|-----------|-----------|----|--------|-----------|-----------|
| 10 | 69.05 | 1515      | 7.02      | 32 | 97.10  | 945       | 4.38      | 56 | 130.15 | 304       | 1.41      |
| 11 | 70.10 | 633       | 2.93      | 34 | 98.15  | 899       | 2.77      | 57 | 131.10 | 1722      | 7.98      |
| 12 | 71.05 | 1365      | 6.32      | 35 | 99.10  | 1268      | 5.87      | 58 | 133.15 | 432       | 2.00      |
| 13 | 72.05 | 440       | 2.04      | 36 | 100.15 | 840       | 3.89      | 59 | 135.20 | 1132      | 5.24      |
| 14 | 73.00 | 2258      | 10.46     | 37 | 101.10 | 5503      | 25.49     | 60 | 143.10 | 908       | 4.21      |
| 15 | 74.00 | 302       | 1.40      | 38 | 102.15 | 699       | 3.24      | 61 | 144.10 | 310       | 0.97      |
| 16 | 75.05 | 583       | 2.70      | 39 | 103.10 | 3649      | 16.90     | 62 | 145.20 | 492       | 2.28      |
| 17 | 77.00 | 268       | 1.24      | 40 | 104.10 | 322       | 1.49      | 63 | 153.20 | 234       | 1.08      |
| 18 | 79.00 | 223       | 1.03      | 41 | 108.10 | 401       | 1.86      | 64 | 155.20 | 281       | 1.30      |
| 19 | 80.10 | 324       | 1.50      | 42 | 110.10 | 220       | 1.02      | 65 | 159.15 | 662       | 3.07      |
| 20 | 81.10 | 954       | 4.42      | 43 | 111.10 | 969       | 4.49      | 66 | 169.20 | 334       | 1.55      |
| 21 | 82.15 | 315       | 1.46      | 44 | 112.15 | 807       | 3.74      | 67 | 171.20 | 204       | 0.95      |
| 22 | 83.10 | 1628      | 7.54      | 45 | 113.10 | 8084      | 37.45     | 68 | 173.20 | 202       | 0.94      |
| 23 | 84.10 | 481       | 2.23      | 46 | 114.10 | 1199      | 5.55      | 69 | 175.20 | 346       | 1.60      |
| 24 | 85.05 | 1397      | 6.47      | 47 | 115.10 | 2001      | 9.27      | 70 | 189.20 | 1038      | 4.81      |
| 25 | 86.05 | 492       | 2.28      | 48 | 116.25 | 936       | 4.34      | 71 | 201.15 | 502       | 2.33      |
| 26 | 87.05 | 5752      | 26.65     | 49 | 117.15 | 6264      | 29.02     | 72 | 247.20 | 575       | 2.66      |
| 27 | 88.00 | 314       | 1.45      | 50 | 118.15 | 607       | 2.81      | 73 | 259.35 | 515       | 2.39      |
| 28 | 89.05 | 560       | 2.59      | 51 | 119.20 | 271       | 1.26      | 74 | 260.40 | 207       | 0.96      |
| 29 | 91.10 | 327       | 1.51      | 52 | 126.15 | 310       | 1.44      | 75 | 305.40 | 401       | 1.86      |
| 30 | 94.10 | 202       | 0.94      | 53 | 127.10 | 1102      | 5.11      | 76 | 306.40 | 281       | 1.30      |
| 31 | 95.10 | 807       | 3.74      | 54 | 128.15 | 589       | 2.73      |    |        |           |           |
| 32 | 96.10 | 278       | 1.29      | 55 | 129.10 | 740       | 3.43      |    |        |           |           |

*Methyl 2-(2-(dicyanomethylene) hydrazinyl)-5-selenocyanatobenzoate (7).*

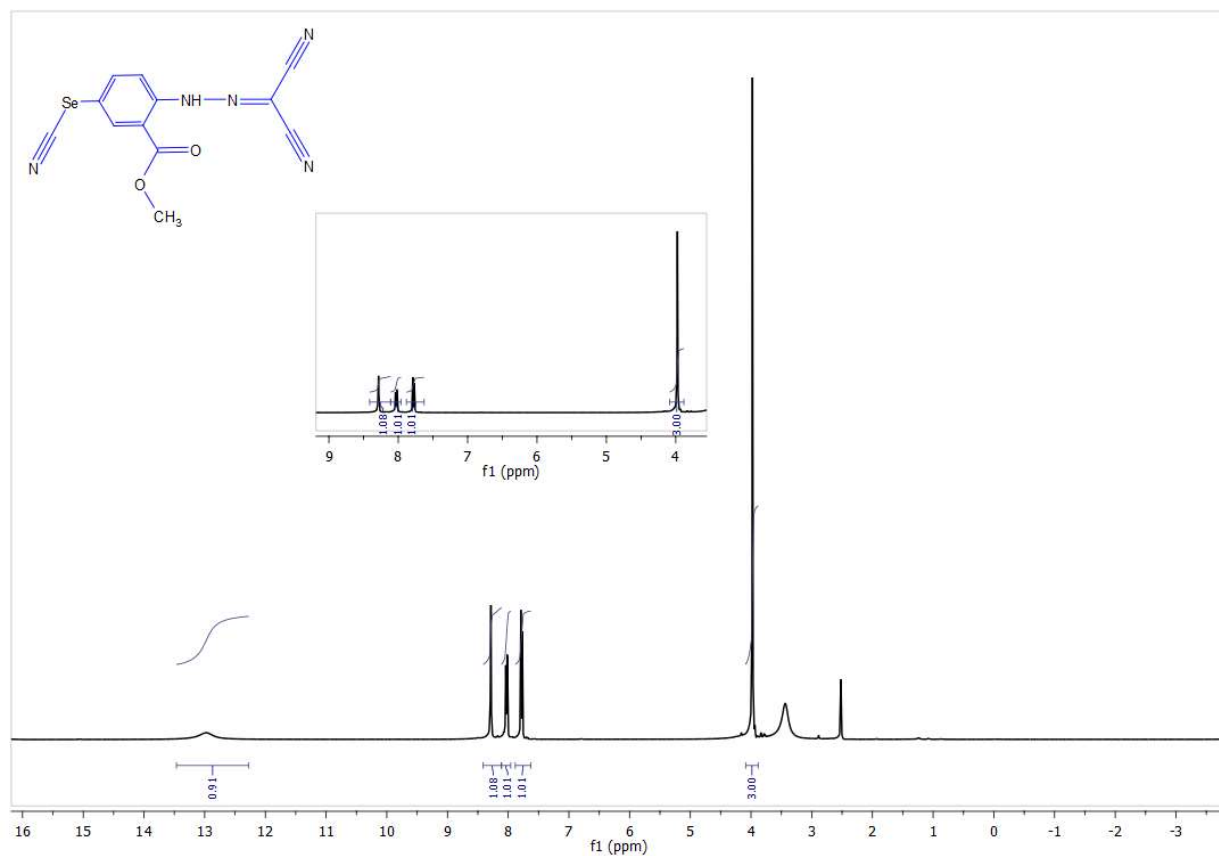

<sup>1</sup>H NMR chart of compound 7

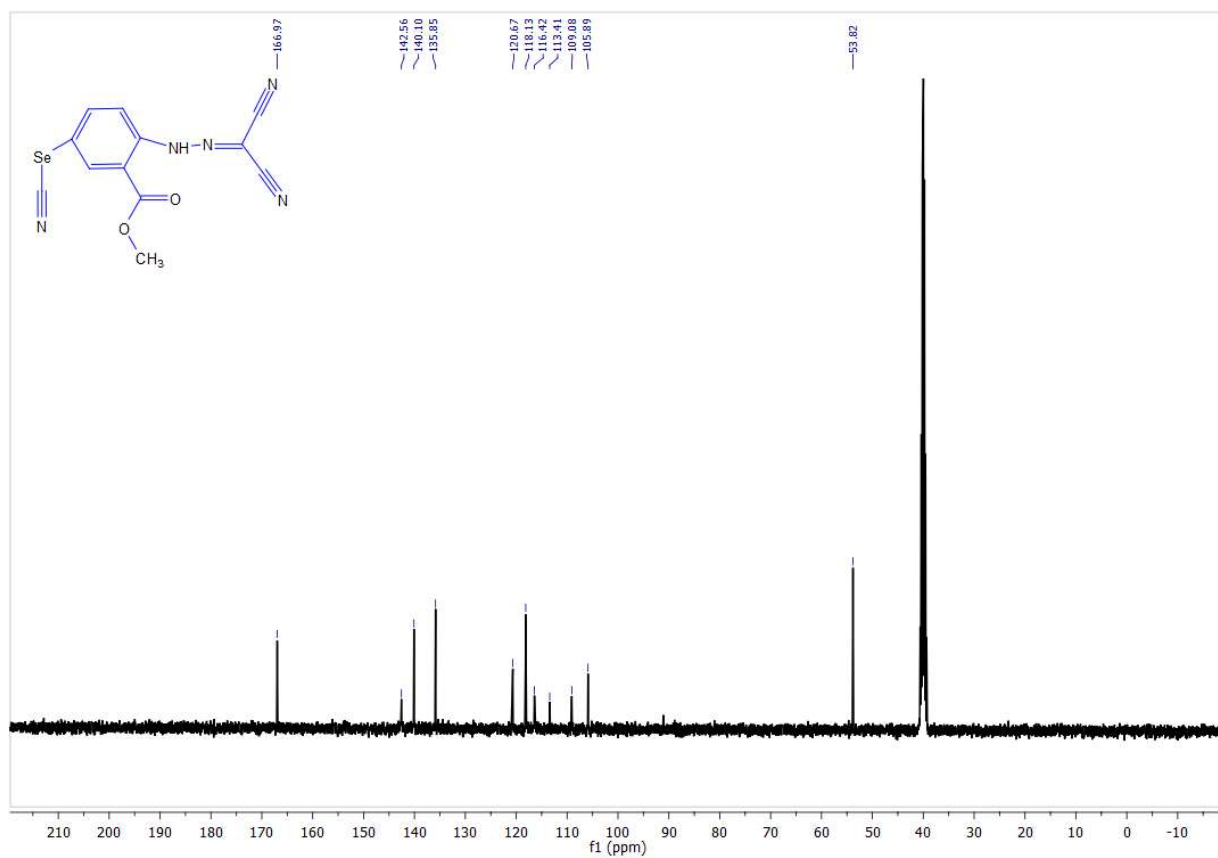

$^{13}\text{C}$ NMR chart of compound 7

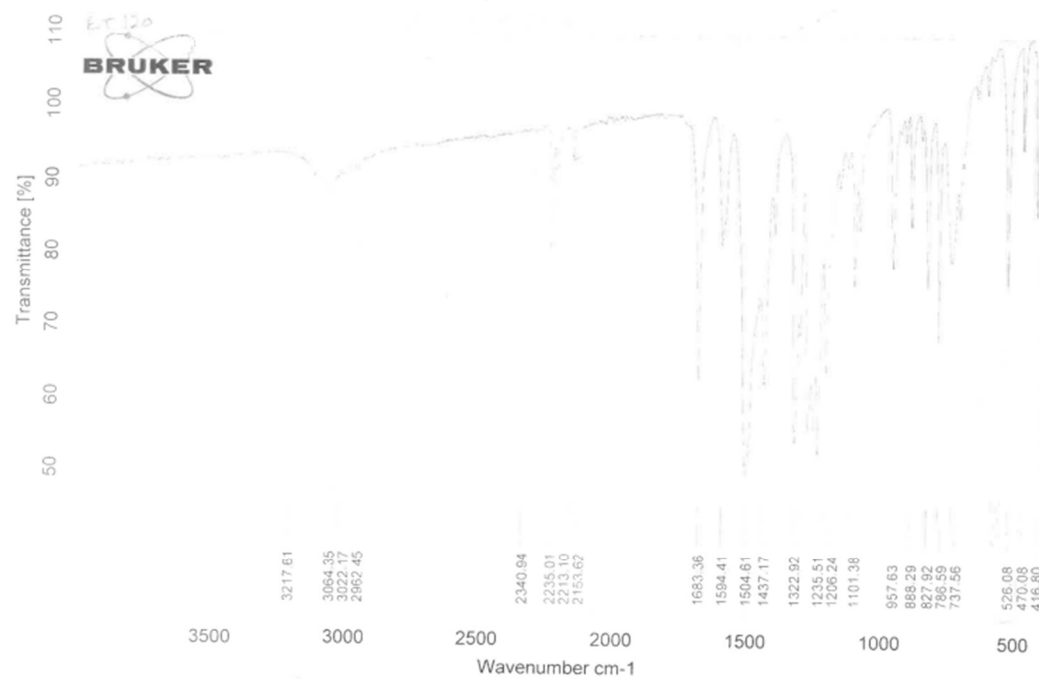

C:\Documents and Settings\adminuser\Desktop\New Folder (2)\test 1.1504

1

Instrument type and / or accessory

10/19/2021

Page 1/1

IR chart of compound 7

# Cairo University Micro Analytical Center

## DI Analysis Shimadzu Qp-2010 Plus

**Sample Information**  
 Analyzed by: Dr. Mai Younis  
 Analyzed: 06/01/2007 07:00:02  
 Sample Name: B25  
 Sample ID:  
 Customer Name: Dr. Mohamed Soliman - Science - Cairo  
 Data File: C:\GCMSolution\Data\Project1\B25 QGD  
 Org Data File: C:\GCMSolution\Data\Project1\B25 QGD  
 Method File: C:\GCMSolution\Data\Project1\High Temperature Op  
 Org Method File: C:\GCMSolution\Data\Project1\High Temperature Op  
 Report File:  
 Tuning File: C:\GCMSolution\System\Tune1\\_default.gp  
 Modified by: Dr. Mai Younis  
 Modified: 06/01/2007 07:03:32

### Method

Analytical Line 1  
 IonSourceTemp: 250.00 °C  
 [MS Table]  
 --Oven 1 - Event 1--  
 Start Time: 0.00min  
 End Time: 10.00min  
 ACQ Mode: Scan  
 Event Time: 0.5000s  
 Scan Speed: 1000  
 Start m/z: 50.00  
 End m/z: 510.00  
 Electron Voltage: 70 eV  
 Ionization Mode: EI

C:\GCMSolution\Data\Project1\B25 QGD

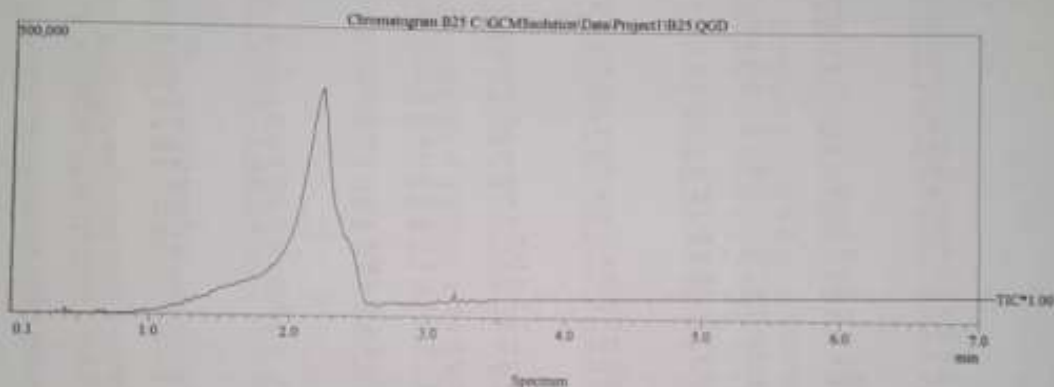

Line#1: R.Time:2.2(Scan#263)

MassPeaks:190

RawMode:Single 2.2(263) BasePeak:63(17554)

BG Mode:None Group 1 - Event 1

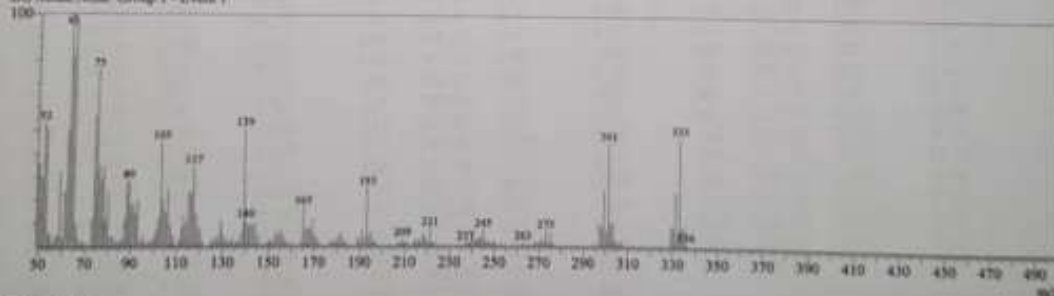

### Mass Table

Line#1: R.Time:2.2(Scan#263)

MassPeaks:190

RawMode:Single 2.2(263) BasePeak:63(17554)

BG Mode:None Group 1 - Event 1

| # | m/z   | Abs. In | Rel. Int. | # | m/z   | Abs. In | Rel. Int. | # | m/z   | Abs. In | Rel. Int. |
|---|-------|---------|-----------|---|-------|---------|-----------|---|-------|---------|-----------|
| 1 | 49.95 | 6235    | 35.52     | 4 | 53.00 | 8940    | 50.93     | 7 | 56.05 | 297     | 1.69      |
| 2 | 51.00 | 5314    | 30.27     | 5 | 54.00 | 1009    | 5.75      | 8 | 57.05 | 761     | 4.34      |
| 3 | 52.00 | 9390    | 53.49     | 6 | 55.00 | 862     | 4.91      | 9 | 58.05 | 831     | 4.73      |

| #  | m/z    | Abs. Int. | Rel. Int. | #   | m/z    | Abs. Int. | Rel. Int. | #   | m/z    | Abs. Int. | Rel. Int. |
|----|--------|-----------|-----------|-----|--------|-----------|-----------|-----|--------|-----------|-----------|
| 10 | 59.00  | 5721      | 32.59     | 71  | 125.00 | 370       | 2.11      | 132 | 209.10 | 529       | 3.01      |
| 11 | 60.05  | 663       | 3.78      | 72  | 126.05 | 461       | 2.63      | 133 | 210.10 | 270       | 1.54      |
| 12 | 61.05  | 4182      | 23.82     | 73  | 127.10 | 754       | 4.30      | 134 | 211.10 | 246       | 1.40      |
| 13 | 62.05  | 8812      | 50.20     | 74  | 128.10 | 503       | 2.87      | 135 | 214.10 | 401       | 2.28      |
| 14 | 63.00  | 17554     | 100.00    | 75  | 129.05 | 1949      | 11.10     | 136 | 215.05 | 420       | 2.39      |
| 15 | 64.00  | 14407     | 82.07     | 76  | 130.05 | 963       | 5.49      | 137 | 216.00 | 476       | 2.71      |
| 16 | 65.00  | 16828     | 95.86     | 77  | 131.00 | 566       | 3.22      | 138 | 217.05 | 415       | 2.36      |
| 17 | 66.00  | 1710      | 9.74      | 78  | 132.00 | 290       | 1.65      | 139 | 218.00 | 913       | 5.20      |
| 18 | 67.05  | 627       | 3.57      | 79  | 133.00 | 383       | 2.18      | 140 | 219.05 | 691       | 3.94      |
| 19 | 68.10  | 233       | 1.33      | 80  | 134.15 | 633       | 3.61      | 141 | 220.10 | 479       | 2.73      |
| 20 | 69.10  | 489       | 2.79      | 81  | 135.10 | 374       | 2.13      | 142 | 221.15 | 1337      | 7.62      |
| 21 | 70.10  | 210       | 1.20      | 82  | 136.10 | 265       | 1.51      | 143 | 222.10 | 233       | 1.33      |
| 22 | 71.40  | 329       | 1.87      | 83  | 137.10 | 329       | 1.87      | 144 | 223.10 | 319       | 1.82      |
| 23 | 73.05  | 2121      | 12.08     | 84  | 138.15 | 996       | 5.67      | 145 | 237.10 | 252       | 1.44      |
| 24 | 74.05  | 9835      | 56.03     | 85  | 139.15 | 8913      | 50.77     | 146 | 238.10 | 271       | 1.54      |
| 25 | 75.00  | 13412     | 76.40     | 86  | 140.05 | 1922      | 10.95     | 147 | 239.10 | 343       | 1.95      |
| 26 | 76.00  | 6102      | 34.76     | 87  | 141.10 | 1618      | 9.22      | 148 | 240.15 | 649       | 3.70      |
| 27 | 77.05  | 5034      | 28.68     | 88  | 142.05 | 1561      | 8.89      | 149 | 241.20 | 473       | 2.69      |
| 28 | 78.00  | 6007      | 34.22     | 89  | 143.05 | 1678      | 9.56      | 150 | 242.20 | 486       | 2.77      |
| 29 | 78.95  | 2014      | 11.47     | 90  | 144.05 | 1611      | 9.18      | 151 | 243.15 | 683       | 3.89      |
| 30 | 79.90  | 4130      | 23.53     | 91  | 145.10 | 697       | 3.97      | 152 | 244.15 | 576       | 3.28      |
| 31 | 81.05  | 708       | 4.03      | 92  | 146.10 | 260       | 1.48      | 153 | 245.10 | 1236      | 7.04      |
| 32 | 82.00  | 751       | 4.28      | 93  | 149.10 | 263       | 1.50      | 154 | 246.00 | 358       | 2.04      |
| 33 | 83.10  | 441       | 2.51      | 94  | 150.00 | 303       | 1.73      | 155 | 247.10 | 490       | 2.79      |
| 34 | 84.15  | 305       | 1.74      | 95  | 151.00 | 454       | 2.59      | 156 | 248.10 | 266       | 1.52      |
| 35 | 85.05  | 414       | 2.36      | 96  | 152.15 | 493       | 2.81      | 157 | 249.10 | 231       | 1.32      |
| 36 | 86.05  | 513       | 2.92      | 97  | 153.05 | 979       | 5.58      | 158 | 250.05 | 360       | 2.05      |
| 37 | 87.10  | 1919      | 10.93     | 98  | 154.05 | 847       | 4.83      | 159 | 253.00 | 230       | 1.31      |
| 38 | 88.05  | 4774      | 27.20     | 99  | 155.05 | 1303      | 7.42      | 160 | 263.00 | 302       | 1.72      |
| 39 | 89.10  | 4967      | 28.30     | 100 | 156.05 | 829       | 4.72      | 161 | 266.00 | 223       | 1.27      |
| 40 | 90.05  | 3175      | 18.09     | 101 | 157.00 | 508       | 2.89      | 162 | 268.05 | 368       | 2.10      |
| 41 | 91.05  | 3197      | 18.21     | 102 | 158.00 | 241       | 1.37      | 163 | 269.00 | 238       | 1.36      |
| 42 | 92.05  | 2418      | 13.77     | 103 | 160.00 | 318       | 1.81      | 164 | 270.20 | 318       | 1.81      |
| 43 | 92.95  | 3422      | 19.49     | 104 | 164.15 | 458       | 2.61      | 165 | 271.10 | 623       | 3.55      |
| 44 | 94.10  | 431       | 2.46      | 105 | 165.10 | 2954      | 16.83     | 166 | 272.10 | 271       | 1.54      |
| 45 | 95.10  | 798       | 4.55      | 106 | 166.10 | 1242      | 7.08      | 167 | 273.10 | 1182      | 6.73      |
| 46 | 96.10  | 215       | 1.22      | 107 | 167.05 | 1331      | 7.58      | 168 | 274.10 | 266       | 1.52      |
| 47 | 97.25  | 344       | 1.96      | 108 | 168.10 | 1294      | 7.37      | 169 | 275.10 | 999       | 5.69      |
| 48 | 98.15  | 303       | 1.73      | 109 | 169.10 | 2054      | 11.70     | 170 | 276.10 | 298       | 1.70      |
| 49 | 99.15  | 433       | 2.47      | 110 | 170.05 | 781       | 4.45      | 171 | 295.10 | 210       | 1.20      |
| 50 | 100.10 | 740       | 4.22      | 111 | 171.05 | 625       | 3.56      | 172 | 297.10 | 1607      | 9.15      |
| 51 | 101.15 | 1309      | 7.46      | 112 | 172.00 | 220       | 1.25      | 173 | 298.15 | 1412      | 8.04      |
| 52 | 102.15 | 2202      | 12.54     | 113 | 177.00 | 313       | 1.78      | 174 | 299.10 | 4186      | 23.85     |
| 53 | 103.05 | 7924      | 45.14     | 114 | 178.00 | 218       | 1.24      | 175 | 300.25 | 1088      | 6.20      |
| 54 | 104.05 | 3393      | 19.33     | 115 | 178.95 | 521       | 2.97      | 176 | 301.15 | 7923      | 45.14     |
| 55 | 105.05 | 2589      | 14.75     | 116 | 180.05 | 467       | 2.66      | 177 | 302.10 | 1836      | 10.46     |
| 56 | 106.00 | 4346      | 24.76     | 117 | 181.05 | 891       | 5.08      | 178 | 303.15 | 1768      | 10.07     |
| 57 | 107.05 | 1590      | 9.06      | 118 | 182.00 | 841       | 4.79      | 179 | 304.10 | 498       | 2.84      |
| 58 | 108.00 | 762       | 4.34      | 119 | 183.10 | 498       | 2.84      | 180 | 305.10 | 306       | 1.74      |
| 59 | 109.00 | 284       | 1.62      | 120 | 184.05 | 289       | 1.65      | 181 | 306.10 | 218       | 1.24      |
| 60 | 111.15 | 491       | 2.80      | 121 | 189.00 | 519       | 2.96      | 182 | 307.15 | 554       | 3.16      |
| 61 | 112.15 | 1343      | 7.65      | 122 | 190.05 | 589       | 3.36      | 183 | 329.15 | 1533      | 8.73      |
| 62 | 113.10 | 2313      | 13.18     | 123 | 191.00 | 1238      | 7.05      | 184 | 330.20 | 1540      | 8.77      |
| 63 | 114.05 | 1644      | 9.37      | 124 | 192.15 | 658       | 3.75      | 185 | 331.15 | 4168      | 23.74     |
| 64 | 115.05 | 4030      | 22.96     | 125 | 193.10 | 4398      | 25.05     | 186 | 332.25 | 1099      | 6.26      |
| 65 | 116.10 | 4033      | 22.97     | 126 | 194.05 | 737       | 4.20      | 187 | 333.15 | 8367      | 47.66     |
| 66 | 117.05 | 6043      | 34.43     | 127 | 195.10 | 967       | 5.51      | 188 | 334.15 | 1409      | 8.03      |
| 67 | 118.05 | 2384      | 13.58     | 128 | 196.10 | 375       | 2.14      | 189 | 335.20 | 1620      | 9.23      |
| 68 | 119.00 | 1342      | 7.64      | 129 | 196.90 | 374       | 2.13      | 190 | 336.20 | 284       | 1.62      |
| 69 | 120.05 | 1312      | 7.47      | 130 | 207.05 | 353       | 2.01      |     |        |           |           |
| 70 | 121.00 | 372       | 2.12      | 131 | 208.10 | 220       | 1.25      |     |        |           |           |

*Methyl 2-(2-(1-cyano-2-ethoxy-2-oxoethylidene) hydrazinyl)-5-selenocyanatobenzoate (8).*

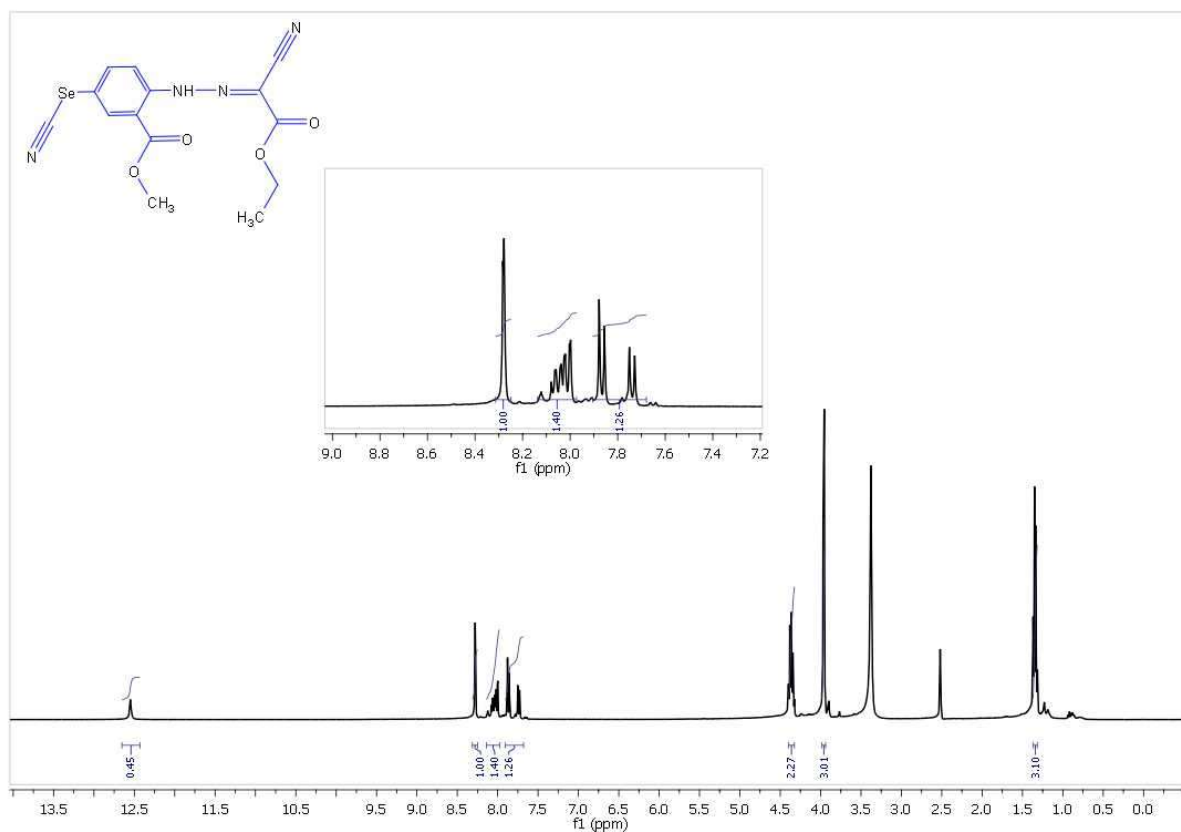

<sup>1</sup>H NMR chart of compound 8

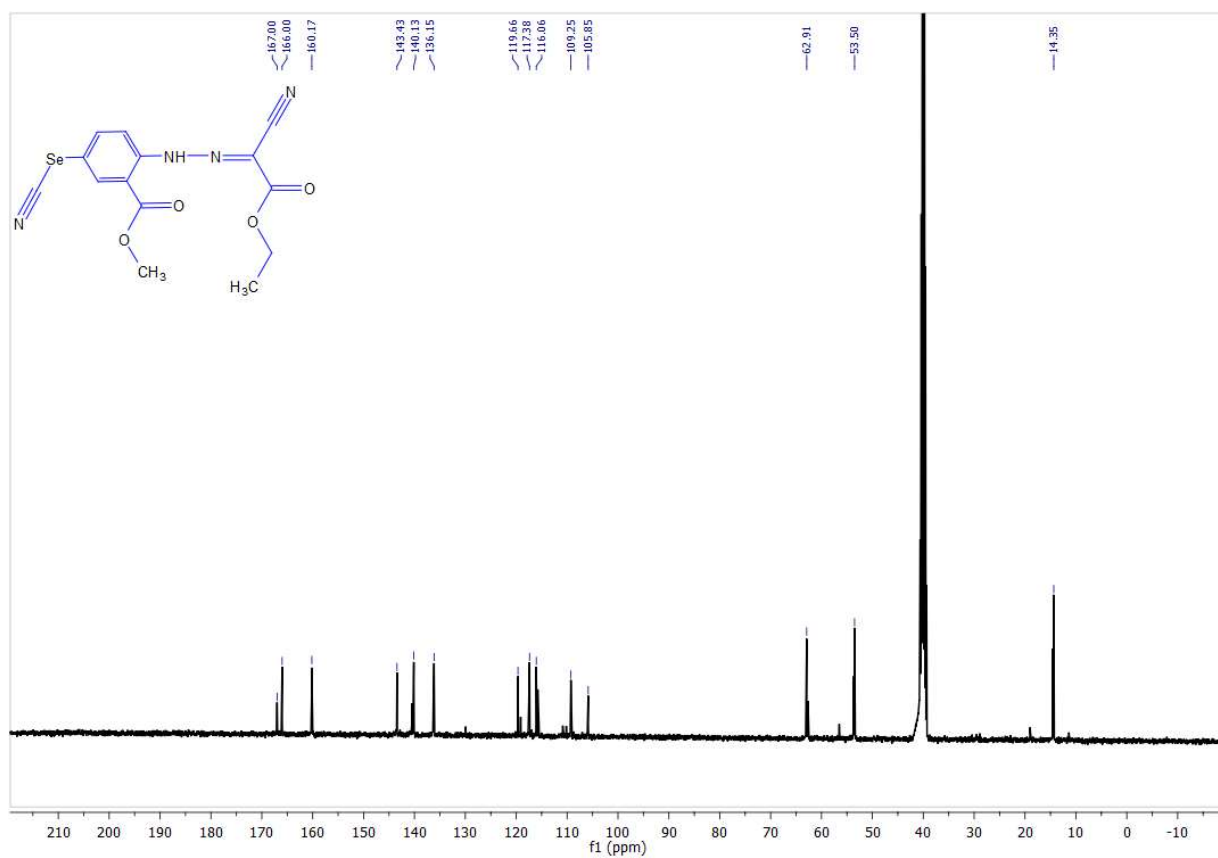

$^{13}\text{C}$ NMR chart of compound **8**

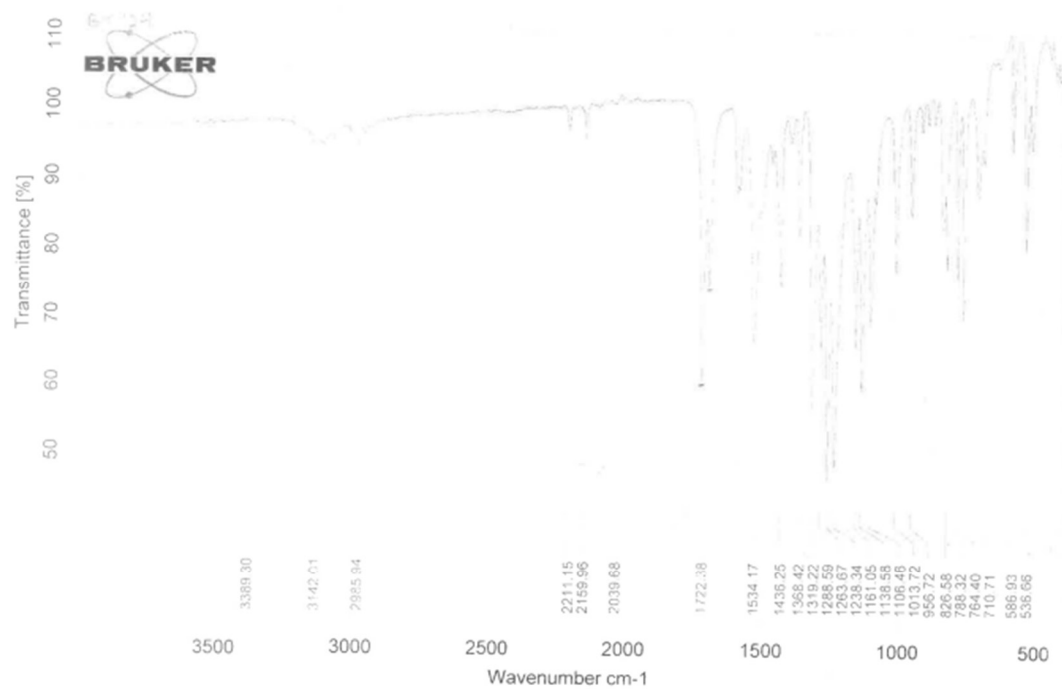

|                                                                        |   |                                    |            |
|------------------------------------------------------------------------|---|------------------------------------|------------|
| C:\Documents and Settings\adminuser\Desktop\New Folder (2)\test 1 1505 | 1 | Instrument type and / or accessory | 10/19/2021 |
|------------------------------------------------------------------------|---|------------------------------------|------------|

Page 1/1

IR chart of compound 8

# Cairo University Micro Analytical Center

## DI Analysis Shimadzu QP-2010 Plus

**Sample Information**  
 Analyzed by: Dr. Mai Younis  
 Analyzed: 06/01/2007 08:17:33  
 Sample Name: B26  
 Sample ID:  
 Customer Name: Dr. Mohamed Soliman - Science - Cairo  
 Data File: C:\GCMSolution\Data\Project1\B26\_QGD  
 Org Data File: C:\GCMSolution\Data\Project1\B26\_QGD  
 Method File: C:\GCMSolution\Data\Project1\High Temperature Op  
 Org Method File: C:\GCMSolution\Data\Project1\High Temperature Op  
 Report File:  
 Tuning File: C:\GCMSolution\System1\Tune1\_default.qm  
 Started/Modified by: Dr. Mai Younis  
 Modified: 06/01/2007 08:19:58

**Method**  
 Analytical Line 1  
 IonSourceTemp: 230.00 °C  
 [MS Table]  
 --Group 1 - Event 1--  
 Start Time: 9.00min  
 End Time: 10.00min  
 Scan: Scan  
 ACQ Mode: Scan  
 Event Time: 0.50sec  
 Scan Speed: 1000  
 Start m/z: 50.00  
 End m/z: 510.00  
 Electron Voltage: 70 eV  
 Ionization Mode: -EI

C:\GCMSolution\Data\Project1\B26\_QGD

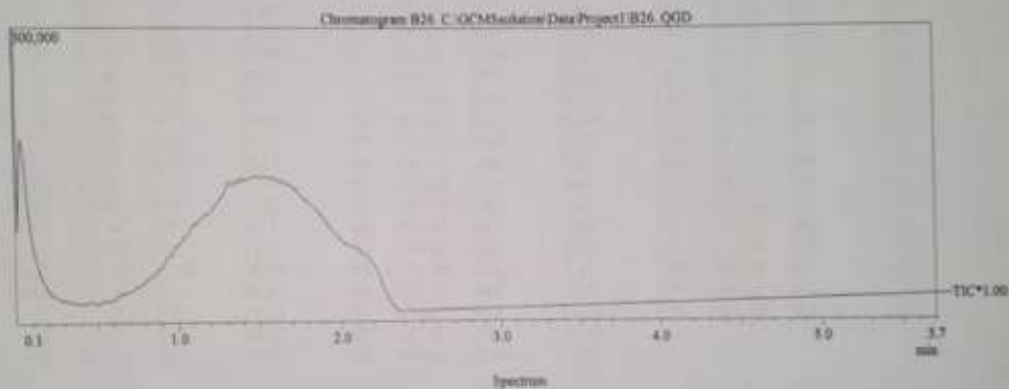

Line# 1 RTime: 1.8(Scan# 218)  
 MassPeaks: 127  
 RawMode: Single 1.8(218) BasePeak: 144(5762)  
 BG Mode: None Group 1 - Event 1

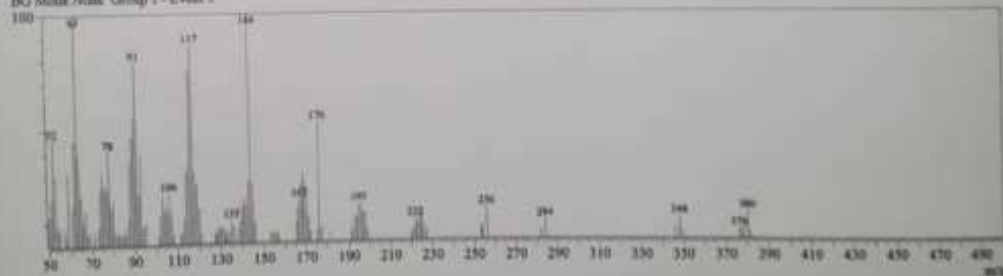

Mass Table  
 Line# 1 RTime: 1.8(Scan# 218)  
 MassPeaks: 127  
 RawMode: Single 1.8(218) BasePeak: 144(5762)  
 BG Mode: None Group 1 - Event 1

| # | m/z   | Abs. In | Rel. Int. | # | m/z   | Abs. In | Rel. Int. | # | m/z   | Abs. In | Rel. Int. |
|---|-------|---------|-----------|---|-------|---------|-----------|---|-------|---------|-----------|
| 1 | 50.00 | 740     | 12.84     | 4 | 53.00 | 1774    | 30.79     | 7 | 57.10 | 452     | 7.84      |
| 2 | 51.00 | 1135    | 19.70     | 5 | 54.00 | 479     | 8.31      | 8 | 58.00 | 230     | 3.99      |
| 3 | 52.00 | 2652    | 46.03     | 6 | 55.00 | 372     | 6.46      | 9 | 59.00 | 1850    | 32.11     |

| #  | m/z    | Abs. In | Rel. Int. | #  | m/z    | Abs. In | Rel. Int. | #   | m/z    | Abs. In | Rel. Int. |
|----|--------|---------|-----------|----|--------|---------|-----------|-----|--------|---------|-----------|
| 10 | 61.00  | 974     | 16.90     | 50 | 108.10 | 223     | 3.87      | 90  | 169.05 | 1733    | 30.08     |
| 11 | 62.00  | 2623    | 45.52     | 51 | 111.10 | 226     | 3.92      | 91  | 170.05 | 1353    | 23.48     |
| 12 | 63.00  | 5626    | 97.64     | 52 | 112.05 | 278     | 4.82      | 92  | 171.00 | 638     | 11.07     |
| 13 | 64.00  | 2241    | 38.89     | 53 | 113.05 | 616     | 10.69     | 93  | 172.00 | 266     | 4.62      |
| 14 | 65.00  | 1233    | 21.40     | 54 | 114.05 | 1793    | 31.12     | 94  | 175.20 | 254     | 4.41      |
| 15 | 66.05  | 557     | 9.67      | 55 | 115.05 | 2007    | 34.83     | 95  | 176.15 | 3012    | 52.27     |
| 16 | 67.00  | 857     | 14.87     | 56 | 116.05 | 4361    | 75.69     | 96  | 177.20 | 361     | 6.27      |
| 17 | 68.00  | 257     | 4.46      | 57 | 117.05 | 4996    | 86.71     | 97  | 181.20 | 228     | 3.96      |
| 18 | 69.00  | 382     | 6.63      | 58 | 118.05 | 1821    | 31.60     | 98  | 191.20 | 244     | 4.23      |
| 19 | 71.00  | 290     | 5.03      | 59 | 119.05 | 1495    | 25.95     | 99  | 192.00 | 289     | 5.02      |
| 20 | 73.00  | 460     | 7.98      | 60 | 120.10 | 886     | 15.38     | 100 | 193.00 | 609     | 10.57     |
| 21 | 74.00  | 1393    | 24.18     | 61 | 121.10 | 239     | 4.15      | 101 | 194.05 | 595     | 10.33     |
| 22 | 75.00  | 1823    | 31.64     | 62 | 127.10 | 225     | 3.90      | 102 | 195.05 | 934     | 16.21     |
| 23 | 75.95  | 1483    | 25.74     | 63 | 128.00 | 273     | 4.74      | 103 | 196.05 | 927     | 16.09     |
| 24 | 77.00  | 1398    | 24.26     | 64 | 129.00 | 396     | 6.87      | 104 | 197.00 | 697     | 12.10     |
| 25 | 78.00  | 2348    | 40.75     | 65 | 130.05 | 403     | 6.99      | 105 | 197.95 | 731     | 12.69     |
| 26 | 78.95  | 905     | 15.71     | 66 | 131.05 | 360     | 6.25      | 106 | 199.00 | 258     | 4.48      |
| 27 | 79.95  | 1123    | 19.49     | 67 | 132.00 | 329     | 5.71      | 107 | 220.00 | 214     | 3.71      |
| 28 | 80.90  | 303     | 5.26      | 68 | 133.00 | 222     | 3.85      | 108 | 221.00 | 289     | 5.02      |
| 29 | 81.90  | 252     | 4.37      | 69 | 134.00 | 332     | 5.76      | 109 | 222.05 | 538     | 9.34      |
| 30 | 82.90  | 279     | 4.84      | 70 | 135.10 | 574     | 9.96      | 110 | 223.05 | 427     | 7.41      |
| 31 | 84.00  | 239     | 4.15      | 71 | 136.10 | 415     | 7.20      | 111 | 224.05 | 781     | 13.55     |
| 32 | 85.00  | 433     | 7.51      | 72 | 138.15 | 310     | 5.38      | 112 | 225.05 | 642     | 11.14     |
| 33 | 86.00  | 247     | 4.29      | 73 | 139.05 | 564     | 9.79      | 113 | 226.20 | 382     | 6.63      |
| 34 | 87.05  | 639     | 11.09     | 74 | 140.10 | 938     | 16.28     | 114 | 227.20 | 234     | 4.06      |
| 35 | 88.00  | 2137    | 37.09     | 75 | 141.10 | 1130    | 19.61     | 115 | 253.20 | 290     | 5.03      |
| 36 | 89.00  | 2690    | 46.69     | 76 | 142.05 | 972     | 16.87     | 116 | 254.00 | 388     | 6.73      |
| 37 | 90.05  | 3182    | 55.22     | 77 | 143.10 | 1534    | 26.62     | 117 | 256.10 | 804     | 13.95     |
| 38 | 91.00  | 4574    | 79.38     | 78 | 144.10 | 5762    | 100.00    | 118 | 282.10 | 242     | 4.20      |
| 39 | 92.05  | 1275    | 22.13     | 79 | 145.10 | 1514    | 26.28     | 119 | 284.10 | 487     | 8.45      |
| 40 | 92.95  | 2227    | 38.65     | 80 | 146.05 | 508     | 8.82      | 120 | 346.10 | 300     | 5.21      |
| 41 | 94.00  | 423     | 7.34      | 81 | 153.00 | 234     | 4.06      | 121 | 348.20 | 554     | 9.61      |
| 42 | 95.00  | 530     | 9.20      | 82 | 154.00 | 255     | 4.43      | 122 | 349.20 | 217     | 3.77      |
| 43 | 101.10 | 202     | 3.51      | 83 | 155.00 | 265     | 4.60      | 123 | 376.20 | 260     | 4.51      |
| 44 | 102.05 | 701     | 12.17     | 84 | 156.00 | 268     | 4.65      | 124 | 377.20 | 218     | 3.78      |
| 45 | 103.05 | 1191    | 20.67     | 85 | 157.00 | 202     | 3.51      | 125 | 378.20 | 402     | 6.98      |
| 46 | 104.05 | 820     | 14.23     | 86 | 165.15 | 483     | 8.38      | 126 | 380.20 | 695     | 12.06     |
| 47 | 105.00 | 900     | 15.62     | 87 | 166.05 | 839     | 14.56     | 127 | 381.20 | 202     | 3.51      |
| 48 | 106.05 | 1281    | 22.23     | 88 | 167.05 | 1065    | 18.48     |     |        |         |           |
| 49 | 107.10 | 838     | 14.54     | 89 | 168.05 | 1510    | 26.21     |     |        |         |           |

*Methyl 2-((5-methyl-3-oxo-2-phenyl-2,3-dihydro-1H-pyrazol-4-yl)diazenyl)-5-selenocyanatobenzoate (9).*

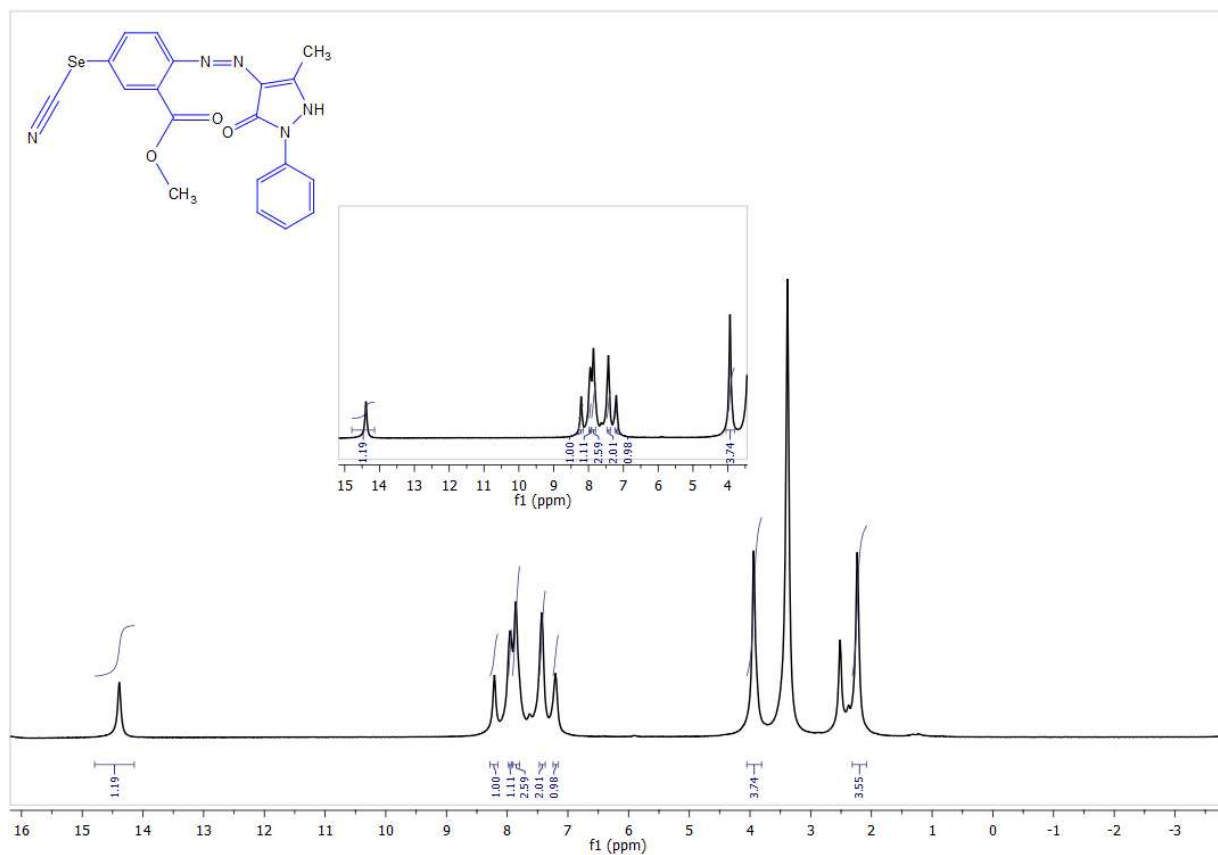

<sup>1</sup>H NMR chart of compound 9

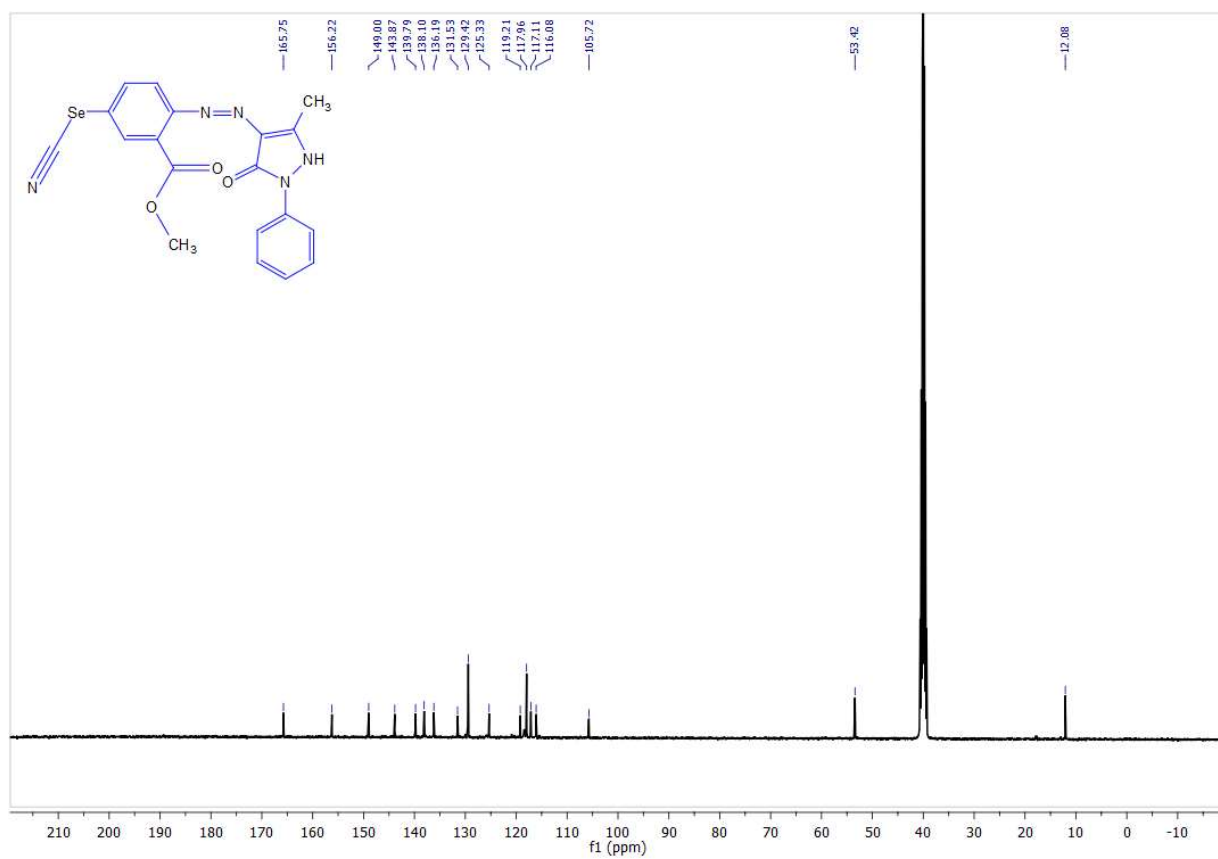

<sup>13</sup>CNMR chart of compound 9

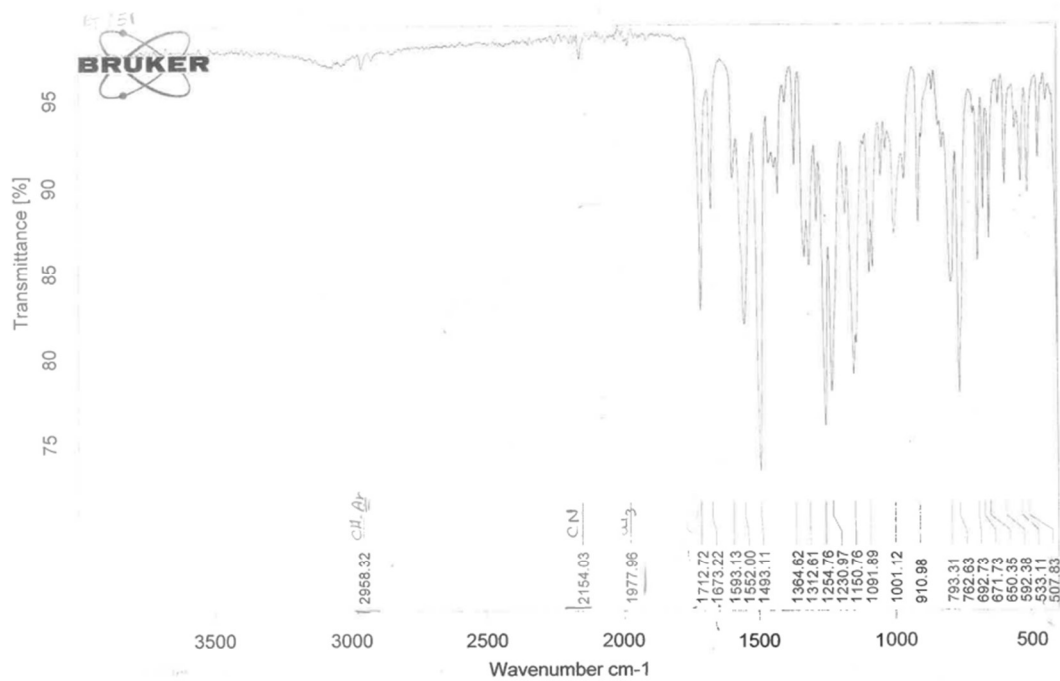

C:\Documents and Settings\adminuser\Desktop\New Folder (2)\test-1.1597

Instrument type and / or accessory

11/25/2021

Page 1/1

IR chart of compound 9

# Cairo University Micro Analytical Center

## DI Analysis Shimadzu Qp-2010 Plus

Sample Information  
 Analyzed by: Dr. Mai Younis  
 Analyzed: 06/01/2007 07:57:00  
 Sample Name: B27  
 Sample ID:  
 Customer Name: Dr. Mohamed Soliman - Science - Cairo  
 Data File: C:\GCMSolution\Data\Project1\B27.QGD  
 Orig Data File: C:\GCMSolution\Data\Project1\B27.QGD  
 Method File: C:\GCMSolution\Data\Project1\High Temperature Op  
 Orig Method File: C:\GCMSolution\Data\Project1\High Temperature Op  
 Report File:  
 Tuning File: C:\GCMSolution\System\Tune1\_default.qpt  
 Modified by: Dr. Mai Younis  
 Modified: 06/01/2007 07:11:16

Method  
 Analytical Line 1  
 IonSourceTemp: 250.00 °C  
 [MS Table]  
 --Group 1 - Event 1--  
 Start Time: 0.00min  
 End Time: 10.00min  
 ACQ Mode: Scan  
 Event Time: 0.30sec  
 Scan Speed: 1000  
 Start m/z: 50.00  
 End m/z: 510.00  
 Electron Voltage: 70 eV  
 Ionization Mode: EI

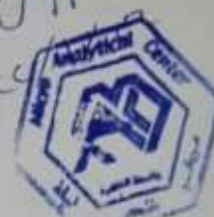

C:\GCMSolution\Data\Project1\B27.QGD

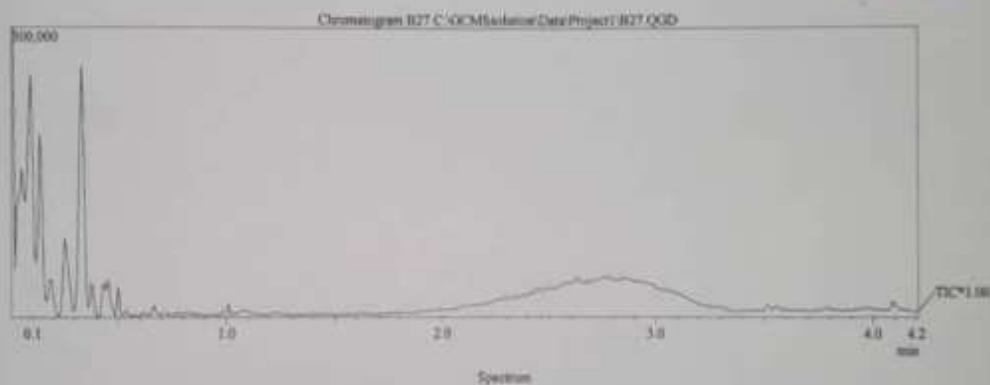

Line# 1 R.Time: 2.8 (Scan# 337)

MassPeaks: 48

RawMode: Single 2.8(337) BasePeak: 77(12868)

BG Mode: None Group 1 - Event 1

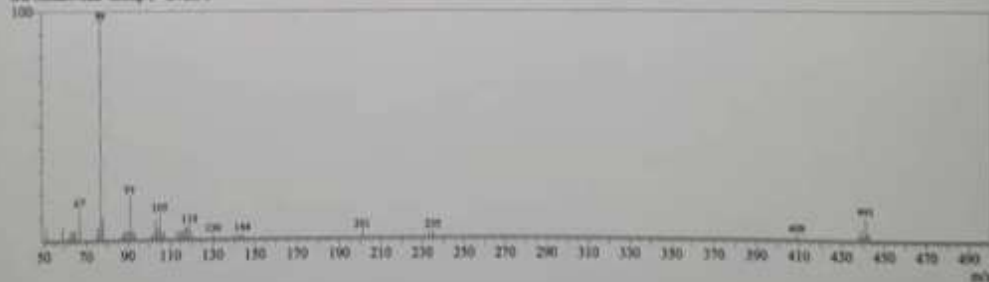

Mass Table

Line# 1 R.Time: 2.8 (Scan# 337)

MassPeaks: 48

RawMode: Single 2.8(337) BasePeak: 77(12868)

BG Mode: None Group 1 - Event 1

| # | m/z   | Abs. In | Rel. Int. | # | m/z   | Abs. In | Rel. Int. | # | m/z   | Abs. In | Rel. Int. |
|---|-------|---------|-----------|---|-------|---------|-----------|---|-------|---------|-----------|
| 1 | 50.95 | 669     | 5.20      | 4 | 62.00 | 204     | 1.59      | 7 | 65.10 | 481     | 3.74      |
| 2 | 51.90 | 236     | 1.83      | 5 | 63.05 | 332     | 4.13      | 8 | 67.00 | 1732    | 13.46     |
| 3 | 59.00 | 748     | 5.81      | 6 | 64.05 | 484     | 3.76      | 9 | 75.05 | 422     | 3.28      |

| #  | m/z    | Abs. In | Rel. Int. | #  | m/z    | Abs. In | Rel. Int. | #  | m/z    | Abs. In | Rel. Int. |
|----|--------|---------|-----------|----|--------|---------|-----------|----|--------|---------|-----------|
| 10 | 76.05  | 779     | 6.05      | 23 | 104.15 | 521     | 4.05      | 36 | 140.10 | 242     | 1.88      |
| 11 | 77.05  | 12868   | 100.00    | 24 | 105.05 | 1427    | 11.09     | 37 | 142.10 | 204     | 1.59      |
| 12 | 78.05  | 1301    | 10.11     | 25 | 106.10 | 386     | 3.00      | 38 | 144.10 | 270     | 2.10      |
| 13 | 87.00  | 502     | 2.35      | 26 | 107.10 | 366     | 2.84      | 39 | 201.10 | 385     | 2.99      |
| 14 | 88.00  | 366     | 2.84      | 27 | 113.10 | 361     | 2.81      | 40 | 233.10 | 234     | 1.82      |
| 15 | 89.00  | 482     | 3.75      | 28 | 114.10 | 442     | 3.43      | 41 | 235.10 | 345     | 2.68      |
| 16 | 90.15  | 473     | 3.68      | 29 | 115.10 | 446     | 3.47      | 42 | 409.10 | 254     | 1.97      |
| 17 | 91.05  | 2453    | 19.06     | 30 | 116.10 | 478     | 3.71      | 43 | 438.10 | 239     | 1.86      |
| 18 | 92.10  | 474     | 3.68      | 31 | 117.10 | 673     | 5.23      | 44 | 439.30 | 614     | 4.77      |
| 19 | 93.00  | 382     | 2.97      | 32 | 118.10 | 638     | 4.96      | 45 | 440.30 | 279     | 2.17      |
| 20 | 101.00 | 212     | 1.65      | 33 | 119.10 | 753     | 5.85      | 46 | 441.30 | 1281    | 9.95      |
| 21 | 102.15 | 374     | 2.91      | 34 | 120.10 | 241     | 1.87      | 47 | 442.30 | 407     | 3.16      |
| 22 | 103.10 | 1055    | 8.20      | 35 | 130.10 | 241     | 1.87      | 48 | 443.30 | 345     | 2.68      |

*Methyl 2-formamido-5-selenocyanatobenzoate (10).*

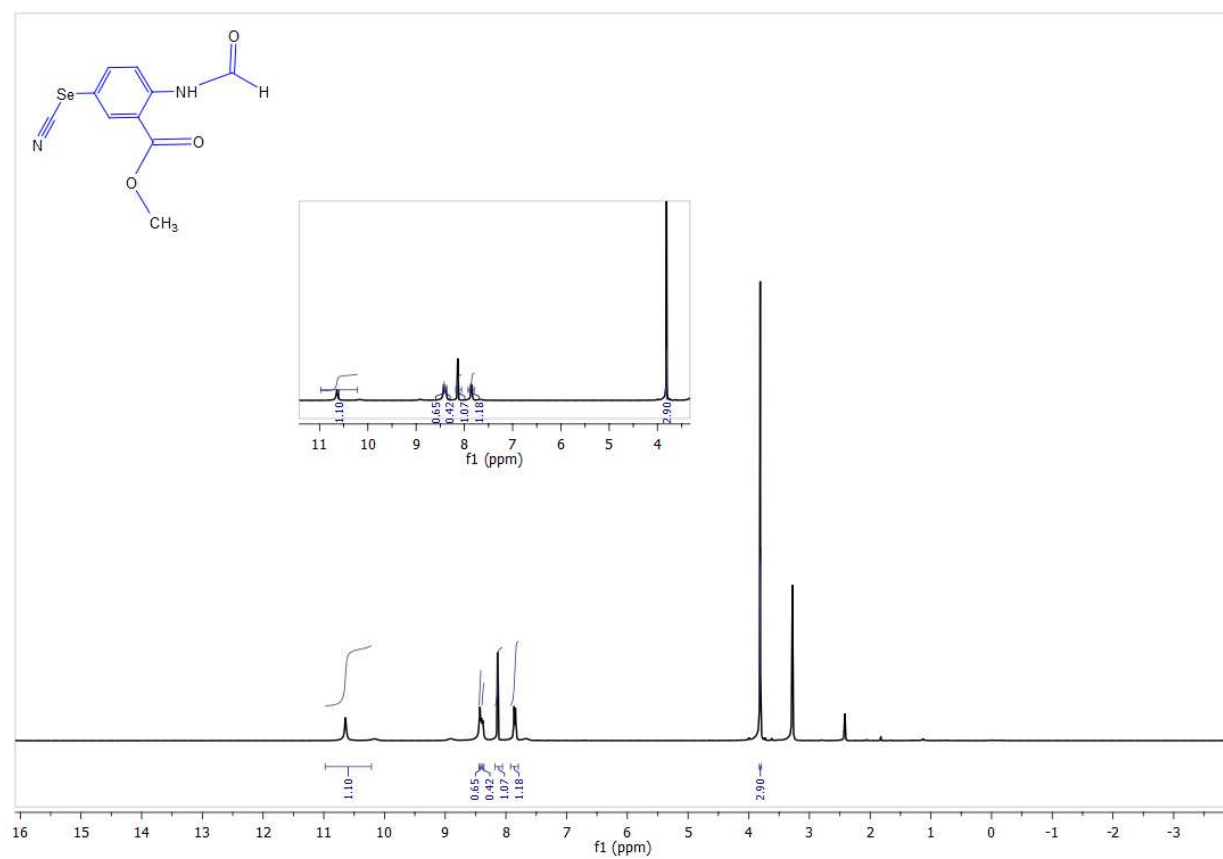

<sup>1</sup>H NMR chart of compound **10**

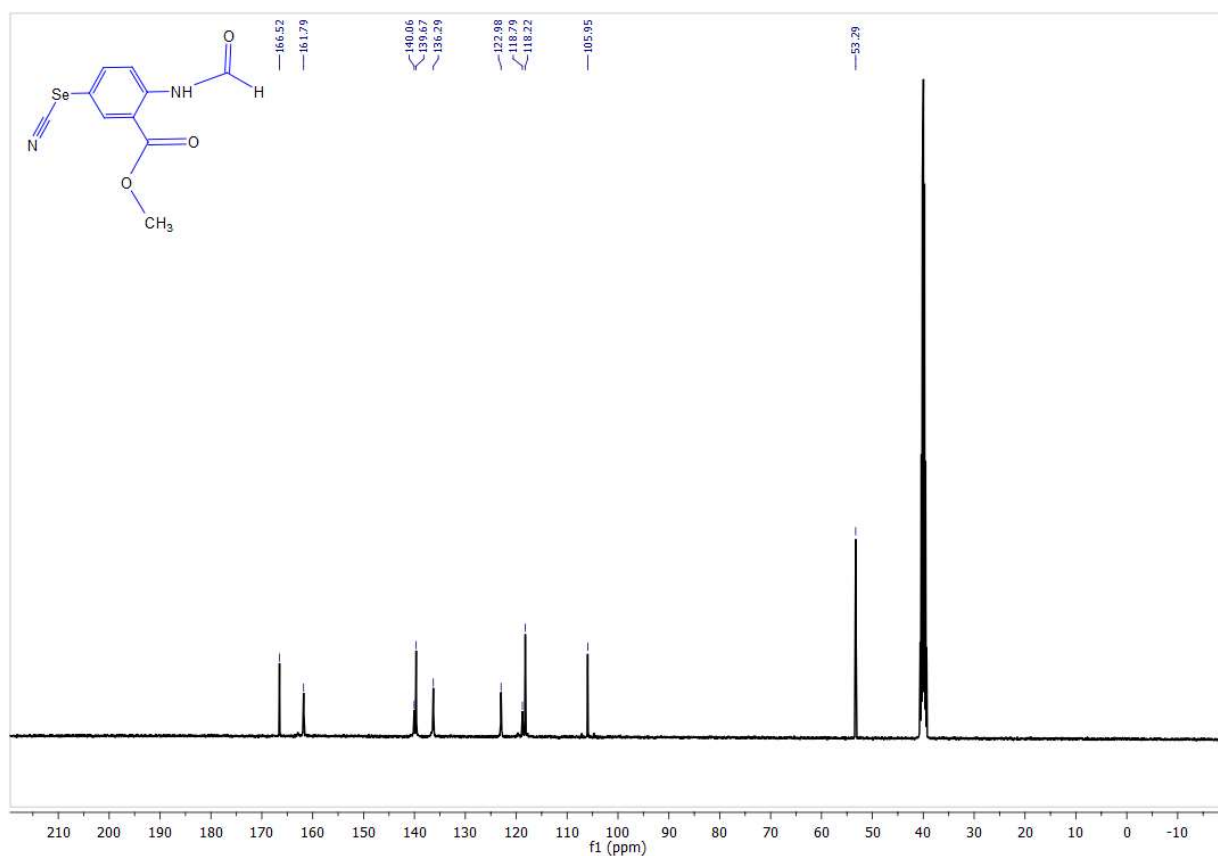

<sup>13</sup>CNMR chart of compound 10

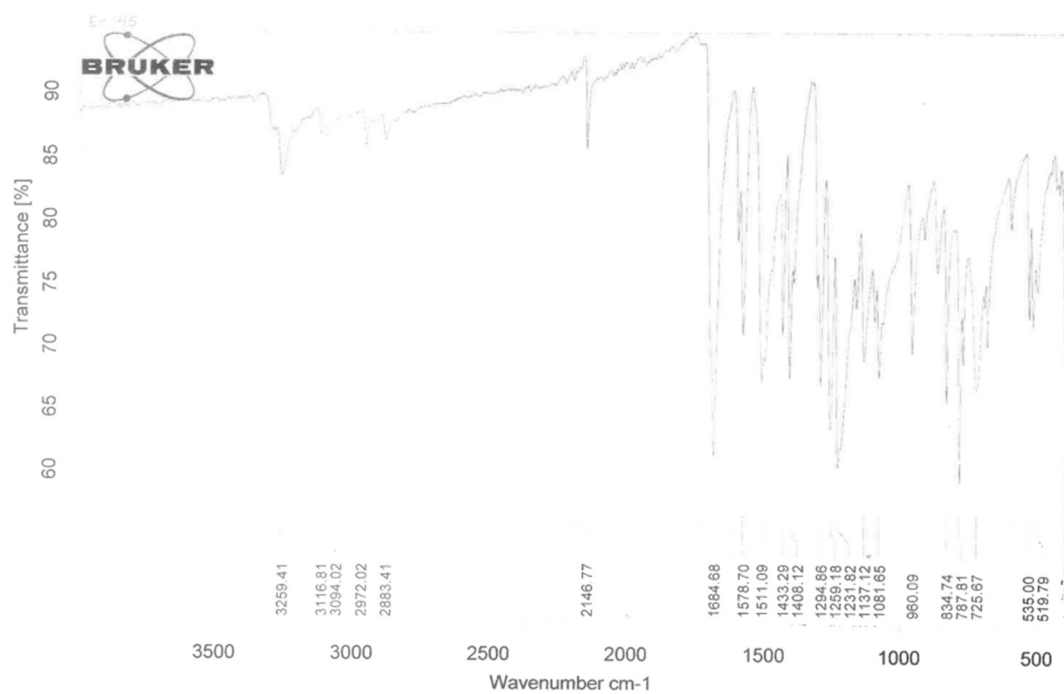

IR chart of compound 10

# Cairo University Micro Analytical Center

## DI Analysis Shimadzu Qp-2010 Plus

Sample Information  
Analyzed by Dr. Mai Younis  
Analyzed 06/01/2007 06:51:09  
Sample Name B17  
Sample ID  
Customer Name Dr. Mohamed Soliman - Science - Cairo  
Data File C:\OCMSolution\Data\Project1\B17.QGD  
Org Data File C:\OCMSolution\Data\Project1\B17.QGD  
Method File C:\OCMSolution\Data\Project1\High Temperature Op  
Org Method File C:\OCMSolution\Data\Project1\High Temperature Op  
Report File  
Tuning File C:\OCMSolution\System\Tune1\_default.qpt  
BG Mod/Modified by Dr. Mai Younis  
Modified 06/01/2007 06:54:39

Method  
Analytical Line 1  
Inlet Source Temp 250.00 °C  
[MS Table]  
-Group 1 - Event 1-  
Start Time 0.00min  
End Time 10.00min  
ACQ Mode Scan  
Event Time 0.50sec  
Scan Speed 1000  
Start m/z 50.00  
End m/z 510.00  
Electron Voltage 70 eV  
Ionization Mode EI

*Dr. Mohamed Soliman*

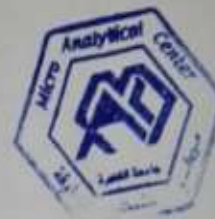

C:\OCMSolution\Data\Project1\B17.QGD

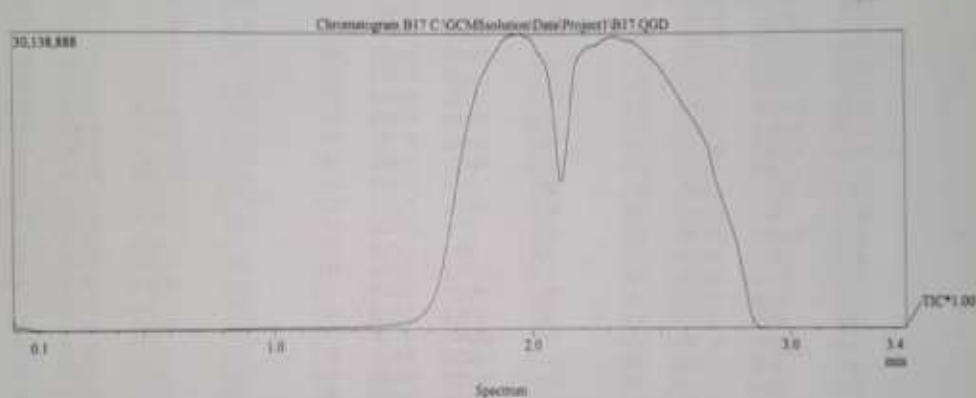

Line# 1 R.Time:2.3(Scan# 279)  
MassPeaks:440  
RawMode:Single 2.3(279) BasePeak:144(2236844)  
BG Mode:None Group 1 - Event 1

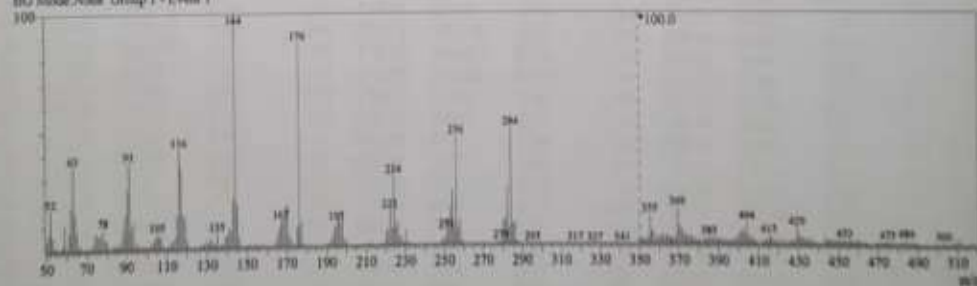

Mass Table  
Line# 1 R.Time:2.3(Scan# 279)  
MassPeaks:440  
RawMode:Single 2.3(279) BasePeak:144(2236844)  
BG Mode:None Group 1 - Event 1

| # | m/z   | Abs. Int. | Rel. Int. | # | m/z   | Abs. Int. | Rel. Int. |
|---|-------|-----------|-----------|---|-------|-----------|-----------|
| 1 | 50.05 | 109661    | 4.90      | 4 | 53.00 | 129159    | 5.77      |
| 2 | 51.05 | 166561    | 7.45      | 5 | 54.00 | 38713     | 1.73      |
| 3 | 52.00 | 382785    | 17.11     | 6 | 55.00 | 30241     | 1.35      |
|   |       |           |           | 7 | 56.05 | 11716     | 0.52      |
|   |       |           |           | 8 | 57.05 | 33633     | 1.50      |
|   |       |           |           | 9 | 58.05 | 50306     | 2.25      |

Mass chart of compound 10

| #  | m/z    | Abs. In | Rel. Int. | #   | m/z    | Abs. In | Rel. Int. | #   | m/z    | Abs. In | Rel. Int. |
|----|--------|---------|-----------|-----|--------|---------|-----------|-----|--------|---------|-----------|
| 10 | 58.95  | 248038  | 11.09     | 79  | 128.10 | 38044   | 1.70      | 148 | 197.05 | 221630  | 9.91      |
| 11 | 60.05  | 37046   | 1.66      | 80  | 129.10 | 47119   | 2.11      | 149 | 198.00 | 332970  | 14.89     |
| 12 | 61.05  | 171368  | 7.66      | 81  | 130.10 | 50866   | 2.27      | 150 | 198.95 | 66888   | 2.99      |
| 13 | 62.05  | 405699  | 18.14     | 82  | 131.15 | 59939   | 2.68      | 151 | 200.00 | 55724   | 2.49      |
| 14 | 63.00  | 790895  | 35.36     | 83  | 132.10 | 94556   | 4.23      | 152 | 200.95 | 7102    | 0.32      |
| 15 | 64.00  | 340220  | 15.21     | 84  | 133.15 | 26411   | 1.18      | 153 | 201.95 | 1209    | 0.05      |
| 16 | 65.00  | 175745  | 7.86      | 85  | 134.15 | 44017   | 1.97      | 154 | 203.15 | 1180    | 0.05      |
| 17 | 66.00  | 43822   | 1.96      | 86  | 135.10 | 137478  | 6.15      | 155 | 204.15 | 1487    | 0.07      |
| 18 | 67.00  | 27620   | 1.23      | 87  | 136.10 | 22551   | 1.01      | 156 | 205.10 | 2825    | 0.13      |
| 19 | 68.05  | 17799   | 0.80      | 88  | 137.15 | 22836   | 1.02      | 157 | 206.10 | 3714    | 0.17      |
| 20 | 69.05  | 22727   | 1.02      | 89  | 138.15 | 39326   | 1.76      | 158 | 207.15 | 5696    | 0.25      |
| 21 | 70.15  | 13106   | 0.59      | 90  | 139.05 | 96165   | 4.30      | 159 | 208.05 | 8627    | 0.39      |
| 22 | 71.10  | 23615   | 1.06      | 91  | 140.10 | 117126  | 5.24      | 160 | 209.10 | 9858    | 0.44      |
| 23 | 72.05  | 14990   | 0.67      | 92  | 141.05 | 190298  | 8.51      | 161 | 210.05 | 12367   | 0.55      |
| 24 | 73.05  | 57567   | 2.57      | 93  | 142.10 | 173746  | 7.77      | 162 | 211.15 | 6149    | 0.27      |
| 25 | 74.05  | 155034  | 6.93      | 94  | 143.15 | 461224  | 20.62     | 163 | 212.10 | 19145   | 0.86      |
| 26 | 75.05  | 151885  | 6.79      | 95  | 144.10 | 223684  | 100.00    | 164 | 213.05 | 4154    | 0.19      |
| 27 | 76.05  | 139269  | 6.23      | 96  | 145.05 | 407435  | 18.21     | 165 | 214.05 | 4873    | 0.22      |
| 28 | 77.05  | 124039  | 5.55      | 97  | 146.05 | 116539  | 5.21      | 166 | 215.10 | 1366    | 0.06      |
| 29 | 78.05  | 196182  | 8.77      | 98  | 147.10 | 25393   | 1.14      | 167 | 216.05 | 1471    | 0.07      |
| 30 | 79.10  | 96289   | 4.30      | 99  | 148.10 | 9620    | 0.43      | 168 | 217.15 | 2322    | 0.10      |
| 31 | 80.05  | 79250   | 3.54      | 100 | 149.15 | 10612   | 0.47      | 169 | 218.10 | 11678   | 0.52      |
| 32 | 81.05  | 25263   | 1.13      | 101 | 150.15 | 22430   | 1.00      | 170 | 219.15 | 19188   | 0.86      |
| 33 | 82.05  | 21681   | 0.97      | 102 | 151.10 | 30009   | 1.34      | 171 | 220.10 | 122052  | 5.46      |
| 34 | 83.15  | 33708   | 1.51      | 103 | 152.05 | 14428   | 0.65      | 172 | 221.15 | 153624  | 6.87      |
| 35 | 84.15  | 34112   | 1.53      | 104 | 153.00 | 22937   | 1.03      | 173 | 222.05 | 327911  | 14.66     |
| 36 | 85.10  | 47278   | 2.11      | 105 | 154.05 | 20315   | 0.91      | 174 | 223.15 | 164908  | 7.37      |
| 37 | 86.05  | 30547   | 1.37      | 106 | 155.00 | 25121   | 1.12      | 175 | 224.05 | 664483  | 29.71     |
| 38 | 87.15  | 76498   | 3.42      | 107 | 156.00 | 18710   | 0.84      | 176 | 225.05 | 173844  | 7.77      |
| 39 | 88.15  | 204197  | 9.13      | 108 | 157.05 | 18190   | 0.81      | 177 | 226.05 | 230824  | 10.32     |
| 40 | 89.15  | 323167  | 14.45     | 109 | 158.05 | 17399   | 0.78      | 178 | 227.05 | 72362   | 3.24      |
| 41 | 90.15  | 570146  | 25.49     | 110 | 159.05 | 8855    | 0.40      | 179 | 228.05 | 91204   | 4.08      |
| 42 | 91.05  | 821014  | 36.70     | 111 | 160.05 | 10300   | 0.46      | 180 | 229.15 | 29097   | 1.30      |
| 43 | 92.05  | 187284  | 8.37      | 112 | 161.05 | 3907    | 0.17      | 181 | 230.10 | 145849  | 6.52      |
| 44 | 93.00  | 248361  | 11.10     | 113 | 162.05 | 5843    | 0.26      | 182 | 231.05 | 21762   | 0.97      |
| 45 | 94.05  | 36015   | 1.61      | 114 | 163.05 | 11311   | 0.51      | 183 | 232.10 | 29526   | 1.32      |
| 46 | 95.00  | 62678   | 2.80      | 115 | 164.05 | 27265   | 1.22      | 184 | 233.05 | 4955    | 0.22      |
| 47 | 96.15  | 16798   | 0.75      | 116 | 165.05 | 86175   | 3.85      | 185 | 234.15 | 1888    | 0.08      |
| 48 | 97.15  | 32440   | 1.45      | 117 | 166.05 | 109438  | 7.57      | 186 | 235.10 | 2953    | 0.13      |
| 49 | 98.15  | 26792   | 1.20      | 118 | 167.05 | 242637  | 10.85     | 187 | 236.15 | 1818    | 0.08      |
| 50 | 99.10  | 29567   | 1.32      | 119 | 168.05 | 275735  | 12.33     | 188 | 237.10 | 4244    | 0.19      |
| 51 | 100.05 | 17202   | 0.77      | 120 | 169.05 | 361299  | 16.15     | 189 | 238.15 | 2684    | 0.12      |
| 52 | 101.15 | 28430   | 1.27      | 121 | 170.00 | 399524  | 17.86     | 190 | 239.10 | 4319    | 0.19      |
| 53 | 102.15 | 47338   | 2.12      | 122 | 171.00 | 137100  | 6.13      | 191 | 240.15 | 2851    | 0.13      |
| 54 | 103.10 | 73967   | 3.31      | 123 | 172.00 | 77889   | 3.48      | 192 | 241.10 | 4428    | 0.20      |
| 55 | 104.15 | 92825   | 4.15      | 124 | 173.05 | 20440   | 0.91      | 193 | 242.10 | 3199    | 0.14      |
| 56 | 105.10 | 144042  | 6.44      | 125 | 174.15 | 20145   | 0.90      | 194 | 243.15 | 1666    | 0.07      |
| 57 | 106.05 | 122516  | 5.48      | 126 | 175.15 | 183799  | 8.22      | 195 | 244.10 | 3049    | 0.14      |
| 58 | 107.10 | 121215  | 5.42      | 127 | 176.10 | 195482  | 87.39     | 196 | 245.15 | 1847    | 0.08      |
| 59 | 108.00 | 29655   | 1.33      | 128 | 177.05 | 232465  | 10.39     | 197 | 246.15 | 2790    | 0.12      |
| 60 | 109.10 | 17502   | 0.78      | 129 | 178.05 | 37231   | 1.66      | 198 | 247.10 | 13729   | 0.61      |
| 61 | 110.15 | 17774   | 0.79      | 130 | 179.05 | 10931   | 0.49      | 199 | 248.15 | 16080   | 0.72      |
| 62 | 111.15 | 37661   | 1.68      | 131 | 180.05 | 6735    | 0.30      | 200 | 249.10 | 51572   | 2.31      |
| 63 | 112.15 | 46156   | 2.06      | 132 | 181.00 | 12223   | 0.55      | 201 | 250.15 | 54456   | 2.43      |
| 64 | 113.05 | 76707   | 3.43      | 133 | 182.00 | 7977    | 0.36      | 202 | 251.15 | 130744  | 5.85      |
| 65 | 114.15 | 107105  | 4.79      | 134 | 183.05 | 6187    | 0.28      | 203 | 252.15 | 224754  | 10.05     |
| 66 | 115.15 | 316300  | 14.14     | 135 | 184.00 | 5886    | 0.26      | 204 | 253.15 | 343150  | 15.34     |
| 67 | 116.15 | 943917  | 42.20     | 136 | 185.00 | 3644    | 0.16      | 205 | 254.10 | 517751  | 23.15     |
| 68 | 117.05 | 758447  | 33.91     | 137 | 186.00 | 2986    | 0.13      | 206 | 255.15 | 196030  | 8.76      |
| 69 | 118.10 | 322599  | 14.42     | 138 | 187.05 | 1991    | 0.09      | 207 | 256.10 | 104249  | 46.61     |
| 70 | 119.05 | 289581  | 12.95     | 139 | 188.05 | 1490    | 0.07      | 208 | 257.05 | 153740  | 6.87      |
| 71 | 120.05 | 80684   | 3.61      | 140 | 189.05 | 3736    | 0.17      | 209 | 258.10 | 237652  | 10.62     |
| 72 | 121.10 | 19041   | 0.85      | 141 | 190.05 | 16283   | 0.73      | 210 | 259.05 | 37170   | 1.66      |
| 73 | 122.15 | 12399   | 0.55      | 142 | 191.05 | 21724   | 0.97      | 211 | 260.05 | 11779   | 0.53      |
| 74 | 123.15 | 11324   | 0.51      | 143 | 192.05 | 51790   | 2.32      | 212 | 260.95 | 2812    | 0.13      |
| 75 | 124.15 | 6748    | 0.30      | 144 | 193.05 | 99157   | 4.43      | 213 | 261.95 | 931     | 0.04      |
| 76 | 125.15 | 16084   | 0.72      | 145 | 194.05 | 174553  | 7.80      | 214 | 263.15 | 1654    | 0.07      |
| 77 | 126.15 | 20881   | 0.93      | 146 | 195.05 | 220661  | 9.86      | 215 | 264.15 | 2174    | 0.10      |
| 78 | 127.10 | 31537   | 1.41      | 147 | 196.05 | 315843  | 14.12     | 216 | 265.15 | 3066    | 0.14      |

| #   | m/z    | Abs. In | Rel. Int. | #   | m/z    | Abs. In | Rel. Int. | #   | m/z    | Abs. In | Rel. Int. |
|-----|--------|---------|-----------|-----|--------|---------|-----------|-----|--------|---------|-----------|
| 217 | 266.15 | 3993    | 0.18      | 286 | 335.15 | 1042    | 0.05      | 355 | 403.25 | 924     | 0.04      |
| 218 | 267.15 | 7831    | 0.35      | 287 | 336.05 | 1224    | 0.05      | 356 | 404.15 | 2125    | 0.09      |
| 219 | 268.10 | 8279    | 0.37      | 288 | 337.15 | 1044    | 0.05      | 357 | 405.20 | 778     | 0.03      |
| 220 | 269.15 | 3757    | 0.17      | 289 | 338.05 | 1267    | 0.06      | 358 | 406.25 | 615     | 0.03      |
| 221 | 270.10 | 14530   | 0.65      | 290 | 339.05 | 1195    | 0.05      | 359 | 407.15 | 429     | 0.02      |
| 222 | 271.05 | 2847    | 0.13      | 291 | 340.05 | 1027    | 0.05      | 360 | 407.50 | 396     | 0.02      |
| 223 | 272.10 | 3444    | 0.15      | 292 | 341.15 | 1699    | 0.08      | 361 | 408.45 | 358     | 0.02      |
| 224 | 273.10 | 1161    | 0.05      | 293 | 342.55 | 671     | 0.03      | 362 | 409.50 | 252     | 0.01      |
| 225 | 274.15 | 853     | 0.04      | 294 | 343.55 | 622     | 0.03      | 363 | 411.50 | 345     | 0.02      |
| 226 | 275.15 | 1138    | 0.05      | 295 | 344.55 | 605     | 0.03      | 364 | 412.30 | 247     | 0.01      |
| 227 | 276.15 | 1258    | 0.06      | 296 | 345.55 | 552     | 0.02      | 365 | 413.35 | 468     | 0.02      |
| 228 | 277.15 | 2928    | 0.13      | 297 | 346.65 | 626     | 0.03      | 366 | 414.35 | 426     | 0.02      |
| 229 | 278.10 | 21009   | 0.94      | 298 | 347.60 | 895     | 0.04      | 367 | 415.25 | 872     | 0.04      |
| 230 | 279.15 | 22091   | 0.99      | 299 | 348.65 | 739     | 0.03      | 368 | 416.25 | 637     | 0.03      |
| 231 | 280.15 | 217622  | 9.73      | 300 | 349.60 | 620     | 0.03      | 369 | 417.35 | 609     | 0.03      |
| 232 | 281.15 | 242313  | 10.83     | 301 | 350.65 | 516     | 0.02      | 370 | 418.50 | 462     | 0.02      |
| 233 | 282.10 | 554734  | 24.80     | 302 | 351.55 | 576     | 0.03      | 371 | 419.45 | 365     | 0.02      |
| 234 | 283.15 | 172172  | 7.70      | 303 | 352.30 | 260     | 0.01      | 372 | 420.70 | 250     | 0.01      |
| 235 | 284.10 | 112086  | 50.11     | 304 | 353.25 | 604     | 0.03      | 373 | 421.65 | 483     | 0.02      |
| 236 | 285.05 | 194577  | 8.70      | 305 | 354.35 | 568     | 0.03      | 374 | 422.75 | 313     | 0.01      |
| 237 | 286.10 | 221772  | 9.91      | 306 | 355.25 | 2759    | 0.12      | 375 | 423.65 | 314     | 0.01      |
| 238 | 287.05 | 35471   | 1.59      | 307 | 356.20 | 1252    | 0.06      | 376 | 425.20 | 369     | 0.02      |
| 239 | 288.05 | 4393    | 0.20      | 308 | 357.25 | 1161    | 0.05      | 377 | 426.30 | 350     | 0.02      |
| 240 | 289.30 | 1150    | 0.05      | 309 | 358.65 | 564     | 0.03      | 378 | 427.25 | 442     | 0.02      |
| 241 | 290.30 | 934     | 0.04      | 310 | 359.65 | 728     | 0.03      | 379 | 428.30 | 422     | 0.02      |
| 242 | 291.30 | 1030    | 0.05      | 311 | 360.65 | 711     | 0.03      | 380 | 429.30 | 1642    | 0.07      |
| 243 | 292.25 | 1018    | 0.05      | 312 | 361.70 | 998     | 0.04      | 381 | 430.25 | 885     | 0.04      |
| 244 | 293.25 | 926     | 0.04      | 313 | 362.65 | 569     | 0.03      | 382 | 431.00 | 655     | 0.03      |
| 245 | 294.25 | 1611    | 0.07      | 314 | 363.75 | 835     | 0.04      | 383 | 432.00 | 726     | 0.03      |
| 246 | 295.25 | 4975    | 0.22      | 315 | 364.65 | 590     | 0.03      | 384 | 433.05 | 577     | 0.03      |
| 247 | 296.15 | 3832    | 0.17      | 316 | 365.75 | 623     | 0.03      | 385 | 434.05 | 569     | 0.03      |
| 248 | 297.15 | 2130    | 0.10      | 317 | 366.30 | 468     | 0.02      | 386 | 434.95 | 339     | 0.02      |
| 249 | 298.10 | 3876    | 0.17      | 318 | 367.25 | 484     | 0.02      | 387 | 435.25 | 361     | 0.02      |
| 250 | 299.20 | 1567    | 0.07      | 319 | 368.35 | 823     | 0.04      | 388 | 436.20 | 758     | 0.03      |
| 251 | 300.20 | 2049    | 0.09      | 320 | 369.30 | 3441    | 0.15      | 389 | 437.25 | 365     | 0.02      |
| 252 | 301.25 | 1040    | 0.05      | 321 | 370.25 | 1788    | 0.08      | 390 | 438.20 | 298     | 0.01      |
| 253 | 302.25 | 713     | 0.03      | 322 | 371.35 | 1387    | 0.06      | 391 | 439.20 | 233     | 0.01      |
| 254 | 303.35 | 1099    | 0.05      | 323 | 372.35 | 957     | 0.04      | 392 | 440.20 | 209     | 0.01      |
| 255 | 304.25 | 968     | 0.04      | 324 | 373.35 | 833     | 0.04      | 393 | 441.20 | 239     | 0.01      |
| 256 | 305.30 | 1873    | 0.08      | 325 | 374.25 | 838     | 0.04      | 394 | 442.40 | 250     | 0.01      |
| 257 | 306.25 | 1195    | 0.05      | 326 | 375.35 | 684     | 0.03      | 395 | 443.45 | 686     | 0.03      |
| 258 | 307.25 | 1183    | 0.05      | 327 | 376.30 | 857     | 0.04      | 396 | 444.40 | 610     | 0.03      |
| 259 | 308.25 | 773     | 0.03      | 328 | 377.35 | 491     | 0.02      | 397 | 445.45 | 489     | 0.02      |
| 260 | 309.25 | 852     | 0.04      | 329 | 378.45 | 397     | 0.02      | 398 | 446.35 | 475     | 0.02      |
| 261 | 310.15 | 796     | 0.04      | 330 | 379.45 | 467     | 0.02      | 399 | 447.35 | 360     | 0.02      |
| 262 | 311.15 | 873     | 0.04      | 331 | 380.20 | 215     | 0.01      | 400 | 448.10 | 462     | 0.02      |
| 263 | 312.20 | 959     | 0.04      | 332 | 381.25 | 325     | 0.01      | 401 | 449.10 | 463     | 0.02      |
| 264 | 313.20 | 1841    | 0.08      | 333 | 382.45 | 418     | 0.02      | 402 | 450.05 | 441     | 0.02      |
| 265 | 314.15 | 1338    | 0.06      | 334 | 383.40 | 562     | 0.03      | 403 | 451.05 | 473     | 0.02      |
| 266 | 315.15 | 1530    | 0.07      | 335 | 384.35 | 459     | 0.02      | 404 | 452.05 | 411     | 0.02      |
| 267 | 316.15 | 1107    | 0.05      | 336 | 385.30 | 681     | 0.03      | 405 | 453.10 | 494     | 0.02      |
| 268 | 317.10 | 1918    | 0.09      | 337 | 386.35 | 531     | 0.02      | 406 | 454.05 | 395     | 0.02      |
| 269 | 318.05 | 964     | 0.04      | 338 | 387.35 | 613     | 0.03      | 407 | 455.20 | 442     | 0.02      |
| 270 | 319.40 | 1063    | 0.05      | 339 | 388.35 | 559     | 0.02      | 408 | 456.15 | 335     | 0.01      |
| 271 | 320.40 | 868     | 0.04      | 340 | 389.35 | 525     | 0.02      | 409 | 456.90 | 396     | 0.02      |
| 272 | 321.45 | 763     | 0.03      | 341 | 390.35 | 579     | 0.03      | 410 | 457.90 | 342     | 0.02      |
| 273 | 322.35 | 572     | 0.03      | 342 | 391.00 | 343     | 0.02      | 411 | 458.90 | 335     | 0.01      |
| 274 | 323.15 | 653     | 0.03      | 343 | 392.00 | 566     | 0.03      | 412 | 459.90 | 425     | 0.02      |
| 275 | 324.05 | 475     | 0.02      | 344 | 393.05 | 412     | 0.02      | 413 | 460.95 | 413     | 0.02      |
| 276 | 325.05 | 722     | 0.03      | 345 | 394.05 | 419     | 0.02      | 414 | 461.90 | 250     | 0.01      |
| 277 | 326.05 | 664     | 0.03      | 346 | 395.05 | 334     | 0.01      | 415 | 462.90 | 257     | 0.01      |
| 278 | 327.15 | 1059    | 0.05      | 347 | 395.95 | 324     | 0.01      | 416 | 463.90 | 244     | 0.01      |
| 279 | 328.15 | 993     | 0.04      | 348 | 396.25 | 303     | 0.01      | 417 | 464.90 | 225     | 0.01      |
| 280 | 329.15 | 825     | 0.04      | 349 | 397.25 | 497     | 0.02      | 418 | 468.90 | 234     | 0.01      |
| 281 | 330.05 | 494     | 0.02      | 350 | 398.25 | 511     | 0.02      | 419 | 469.90 | 258     | 0.01      |
| 282 | 331.15 | 723     | 0.03      | 351 | 399.25 | 612     | 0.03      | 420 | 470.90 | 212     | 0.01      |
| 283 | 332.05 | 792     | 0.04      | 352 | 400.25 | 984     | 0.04      | 421 | 471.90 | 276     | 0.01      |
| 284 | 333.15 | 705     | 0.03      | 353 | 401.25 | 1274    | 0.06      | 422 | 472.90 | 335     | 0.01      |
| 285 | 334.05 | 1007    | 0.05      | 354 | 402.20 | 1566    | 0.07      | 423 | 473.90 | 268     | 0.01      |

*Methyl 2-acetamido-5-selenocyanatobenzoate (11).*

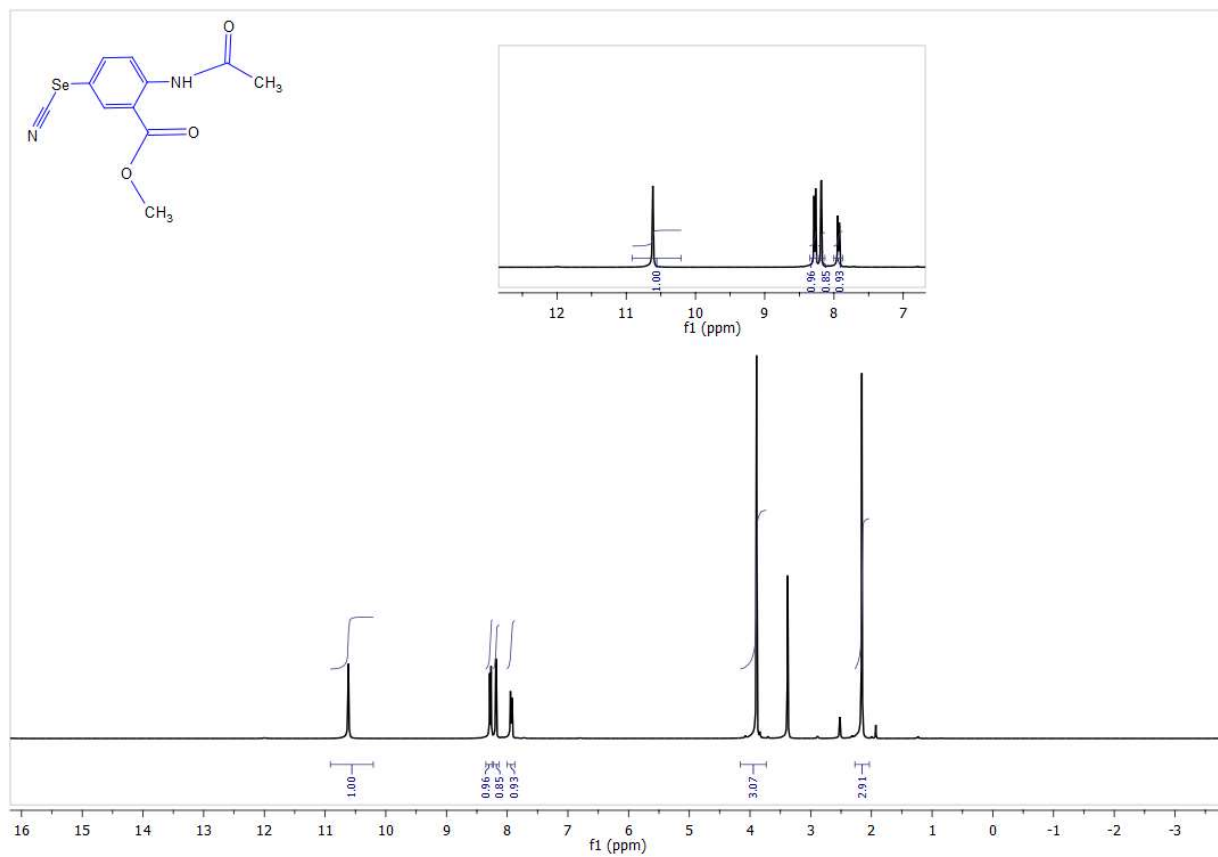

$^1\text{H}$ NMR chart of compound **11**

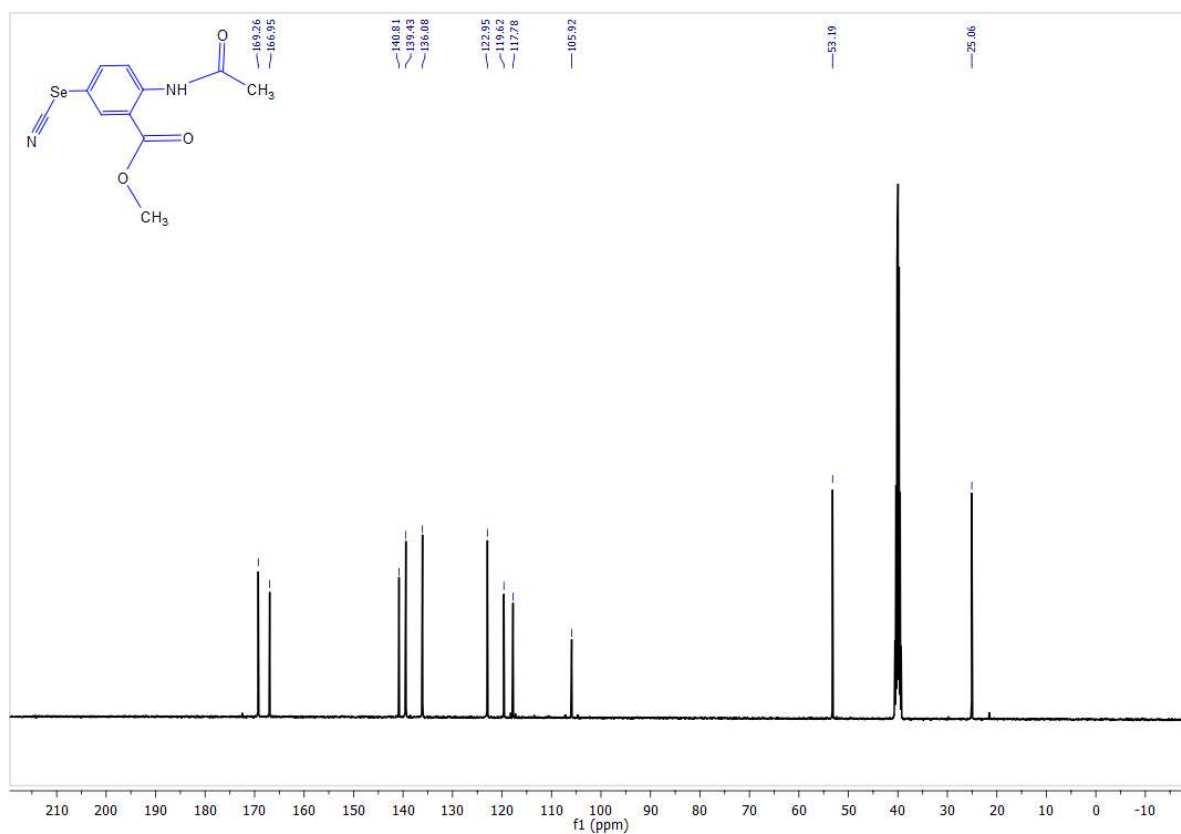

<sup>13</sup>CNMR chart of compound 11

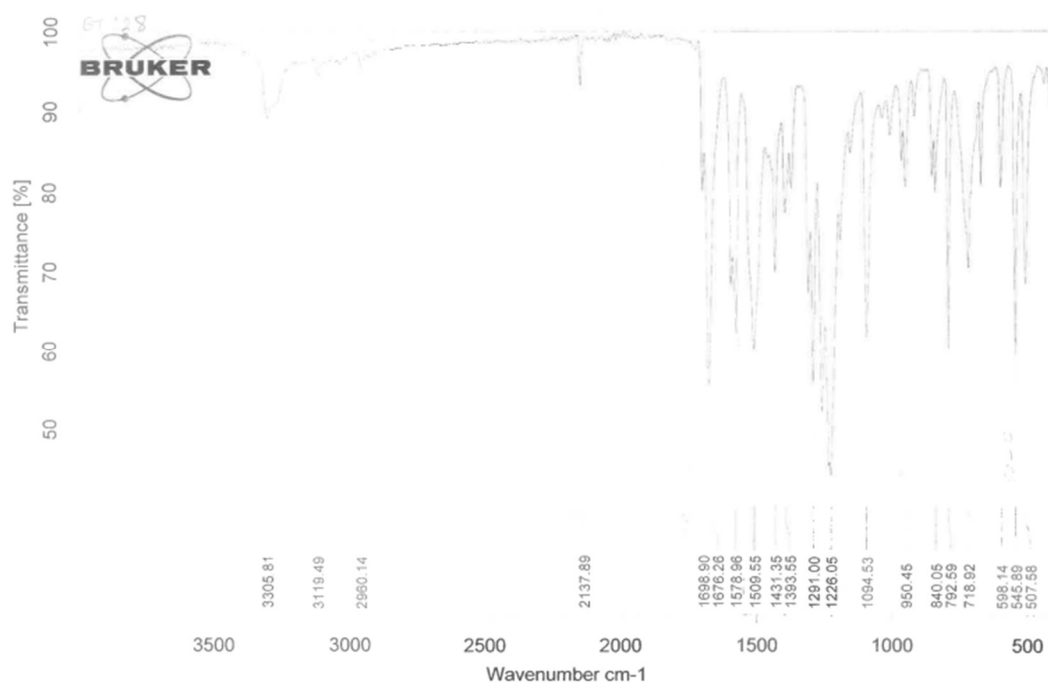

IR chart of compound 11

# Cairo University Micro Analytical Center

## DI Analysis Shimadzu Qp-2010 Plus

**Sample Information**  
 Analyzed by: Dr. Mai Younis  
 Analyzed: 06/01/2007 07:42:40  
 Sample Name: D116  
 Sample ID:  
 Customer Name: IV Microanal Solution - Science - Cairo  
 Data File: C:\GCMSolution\Data\Project1\B16.QGD  
 Orig. Data File: C:\GCMSolution\Data\Project1\B16.QGD  
 Method File: C:\GCMSolution\Data\Project1\High Temperature Op  
 Orig. Method File: C:\GCMSolution\Data\Project1\High Temperature Op  
 Report File:  
 Tuning File: C:\GCMSolution\System1\Tune1\_default.qpt  
 Modified by: Dr. Mai Younis  
 Modified: 06/01/2007 07:46:44

### Method

Analytical Line 1  
 InletSourceTemp: 230.00 °C  
 [MS Table]  
 ->Group 1 - Event 1-  
 Start Time: 0.00min  
 End Time: 10.00min  
 ACQ Mode: Scan  
 Scan Time: 0.50sec  
 Scan Speed: 1000  
 Start m/z: 50.00  
 End m/z: 510.00  
 Electron Voltage: 70 eV  
 Ionization Mode: EI

C:\GCMSolution\Data\Project1\B16.QGD

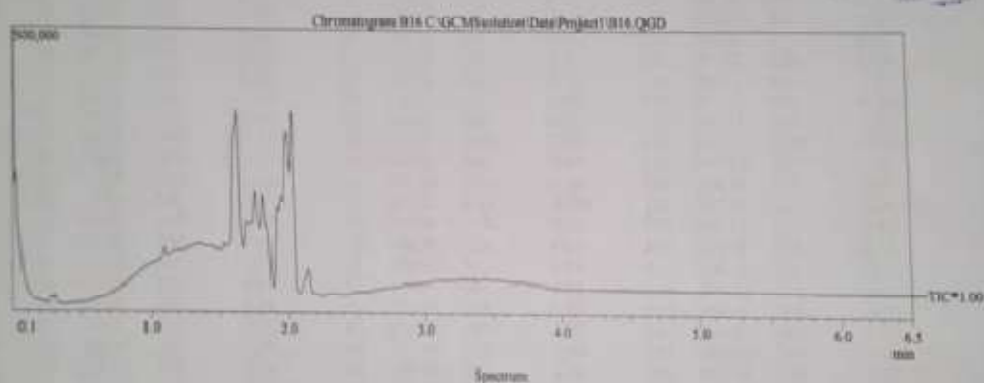

Line#1 R.Time:1.7(Scan#202)  
 MassPeaks:145(Peak Elimination m/z: 434.10)  
 RawMode:Single 1.7(202) BasePeak:144(6311)  
 BG Mode:None Group 1 - Event 1

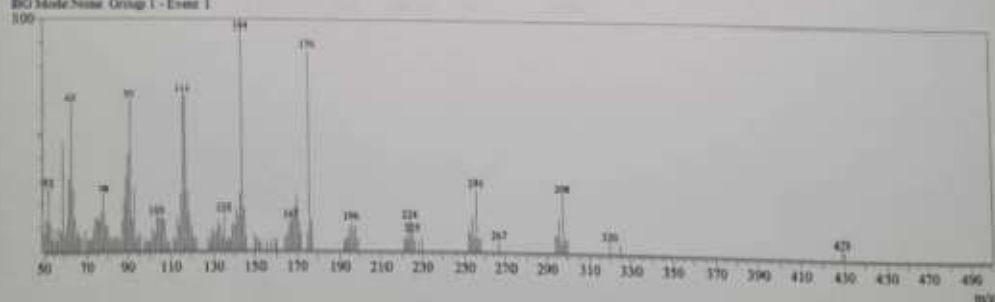

### Mass Table

Line#1 R.Time:1.7(Scan#202)

MassPeaks:145(Peak Elimination m/z: 434.10)

RawMode:Single 1.7(202) BasePeak:144(6311)

BG Mode:None Group 1 - Event 1

| # | m/z   | Abs. Int. | Rel. Int. | # | m/z   | Abs. Int. | Rel. Int. | # | m/z   | Abs. Int. | Rel. Int. |
|---|-------|-----------|-----------|---|-------|-----------|-----------|---|-------|-----------|-----------|
| 1 | 50.00 | 476       | 7.54      | 4 | 52.90 | 734       | 11.63     | 7 | 56.00 | 239       | 3.79      |
| 2 | 51.05 | 788       | 12.49     | 5 | 53.90 | 263       | 4.17      | 8 | 57.00 | 607       | 9.62      |
| 3 | 52.00 | 1668      | 26.43     | 6 | 54.95 | 581       | 9.21      | 9 | 58.05 | 490       | 7.76      |

| #  | m/z    | Abs. In | Rel. Int. | #   | m/z    | Abs. In | Rel. Int. | #   | m/z    | Abs. In | Rel. Int. |
|----|--------|---------|-----------|-----|--------|---------|-----------|-----|--------|---------|-----------|
| 10 | 59.00  | 2988    | 47.35     | 56  | 107.10 | 799     | 12.66     | 102 | 167.00 | 783     | 12.41     |
| 11 | 59.95  | 416     | 6.59      | 57  | 108.10 | 225     | 3.57      | 103 | 168.00 | 980     | 15.53     |
| 12 | 60.95  | 719     | 11.39     | 58  | 109.10 | 207     | 3.28      | 104 | 169.05 | 1203    | 19.06     |
| 13 | 62.00  | 1954    | 30.96     | 59  | 111.10 | 316     | 5.01      | 105 | 170.00 | 1479    | 23.44     |
| 14 | 63.00  | 3983    | 63.11     | 60  | 112.10 | 217     | 3.44      | 106 | 170.95 | 746     | 11.82     |
| 15 | 64.00  | 1626    | 25.76     | 61  | 113.15 | 871     | 13.80     | 107 | 171.80 | 436     | 6.91      |
| 16 | 64.95  | 841     | 13.33     | 62  | 114.15 | 655     | 10.38     | 108 | 175.15 | 474     | 7.51      |
| 17 | 65.90  | 442     | 7.00      | 63  | 115.05 | 1485    | 23.53     | 109 | 176.10 | 5481    | 86.85     |
| 18 | 66.90  | 343     | 5.43      | 64  | 116.10 | 4274    | 67.72     | 110 | 177.05 | 754     | 11.95     |
| 19 | 69.00  | 529     | 8.38      | 65  | 117.05 | 4252    | 67.37     | 111 | 192.10 | 234     | 3.71      |
| 20 | 70.00  | 257     | 4.07      | 66  | 118.10 | 1641    | 26.00     | 112 | 193.10 | 326     | 5.17      |
| 21 | 71.30  | 319     | 5.05      | 67  | 119.05 | 1021    | 16.18     | 113 | 193.90 | 308     | 4.88      |
| 22 | 72.00  | 260     | 4.12      | 68  | 120.30 | 639     | 10.13     | 114 | 194.95 | 565     | 8.95      |
| 23 | 73.00  | 543     | 8.60      | 69  | 121.20 | 350     | 5.55      | 115 | 195.90 | 743     | 11.77     |
| 24 | 74.00  | 835     | 13.55     | 70  | 122.20 | 286     | 4.53      | 116 | 196.90 | 498     | 7.89      |
| 25 | 75.05  | 881     | 13.96     | 71  | 127.20 | 266     | 4.21      | 117 | 197.90 | 649     | 10.28     |
| 26 | 76.00  | 778     | 12.33     | 72  | 128.20 | 226     | 3.58      | 118 | 198.90 | 293     | 4.67      |
| 27 | 76.95  | 1022    | 16.19     | 73  | 129.05 | 536     | 8.49      | 119 | 221.00 | 286     | 4.53      |
| 28 | 77.95  | 1497    | 23.72     | 74  | 130.05 | 387     | 6.13      | 120 | 222.00 | 404     | 6.40      |
| 29 | 79.00  | 650     | 10.30     | 75  | 131.20 | 535     | 8.48      | 121 | 222.90 | 278     | 4.41      |
| 30 | 79.95  | 647     | 10.25     | 76  | 132.15 | 768     | 12.17     | 122 | 223.95 | 796     | 12.61     |
| 31 | 81.00  | 346     | 5.48      | 77  | 133.10 | 660     | 10.46     | 123 | 225.10 | 420     | 6.66      |
| 32 | 82.00  | 262     | 4.15      | 78  | 134.25 | 360     | 5.70      | 124 | 226.10 | 257     | 4.07      |
| 33 | 83.00  | 343     | 5.43      | 79  | 135.20 | 940     | 14.89     | 125 | 228.10 | 241     | 3.82      |
| 34 | 84.00  | 332     | 5.26      | 80  | 136.20 | 236     | 3.74      | 126 | 230.10 | 322     | 5.10      |
| 35 | 84.95  | 347     | 5.50      | 81  | 137.20 | 271     | 4.29      | 127 | 252.20 | 526     | 8.33      |
| 36 | 85.90  | 250     | 3.96      | 82  | 138.00 | 281     | 4.45      | 128 | 253.05 | 451     | 7.15      |
| 37 | 87.10  | 785     | 12.44     | 83  | 139.05 | 643     | 10.19     | 129 | 254.10 | 938     | 14.86     |
| 38 | 88.05  | 1331    | 21.09     | 84  | 140.00 | 666     | 10.55     | 130 | 255.15 | 339     | 5.37      |
| 39 | 89.10  | 1970    | 31.22     | 85  | 141.05 | 1133    | 17.95     | 131 | 256.15 | 1677    | 26.57     |
| 40 | 90.05  | 2620    | 41.51     | 86  | 142.10 | 951     | 15.07     | 132 | 257.10 | 321     | 5.09      |
| 41 | 91.05  | 4106    | 65.06     | 87  | 143.10 | 1506    | 23.86     | 133 | 258.10 | 350     | 5.55      |
| 42 | 91.95  | 844     | 13.37     | 88  | 144.05 | 6311    | 100.00    | 134 | 267.10 | 231     | 3.66      |
| 43 | 92.95  | 1683    | 26.67     | 89  | 145.00 | 1150    | 18.22     | 135 | 294.15 | 421     | 6.67      |
| 44 | 93.90  | 279     | 4.42      | 90  | 146.00 | 318     | 5.04      | 136 | 295.10 | 436     | 6.91      |
| 45 | 95.00  | 446     | 7.07      | 91  | 150.00 | 385     | 6.10      | 137 | 296.15 | 866     | 13.72     |
| 46 | 97.00  | 297     | 4.71      | 92  | 151.00 | 281     | 4.45      | 138 | 297.10 | 222     | 3.52      |
| 47 | 98.00  | 218     | 3.45      | 93  | 152.00 | 258     | 4.09      | 139 | 298.10 | 1554    | 24.62     |
| 48 | 99.00  | 210     | 3.33      | 94  | 153.00 | 207     | 3.28      | 140 | 299.10 | 346     | 5.48      |
| 49 | 100.00 | 233     | 3.69      | 95  | 155.00 | 233     | 3.69      | 141 | 300.10 | 324     | 5.13      |
| 50 | 101.10 | 577     | 9.14      | 96  | 157.00 | 274     | 4.34      | 142 | 320.10 | 249     | 3.95      |
| 51 | 102.05 | 444     | 7.04      | 97  | 159.00 | 278     | 4.41      | 143 | 325.10 | 217     | 3.44      |
| 52 | 103.10 | 894     | 14.17     | 98  | 160.00 | 270     | 4.28      | 144 | 429.10 | 242     | 3.83      |
| 53 | 104.10 | 857     | 13.58     | 99  | 164.00 | 281     | 4.45      | 145 | 430.10 | 239     | 3.79      |
| 54 | 105.05 | 894     | 14.17     | 100 | 164.95 | 406     | 6.43      |     |        |         |           |
| 55 | 106.05 | 852     | 13.50     | 101 | 166.05 | 675     | 10.70     |     |        |         |           |

Mass chart of compound 11

(Z)-4-((2-(methoxycarbonyl)-4-selenocyanatophenyl) amino)-4-oxobut-2-enoic acid (**12**).

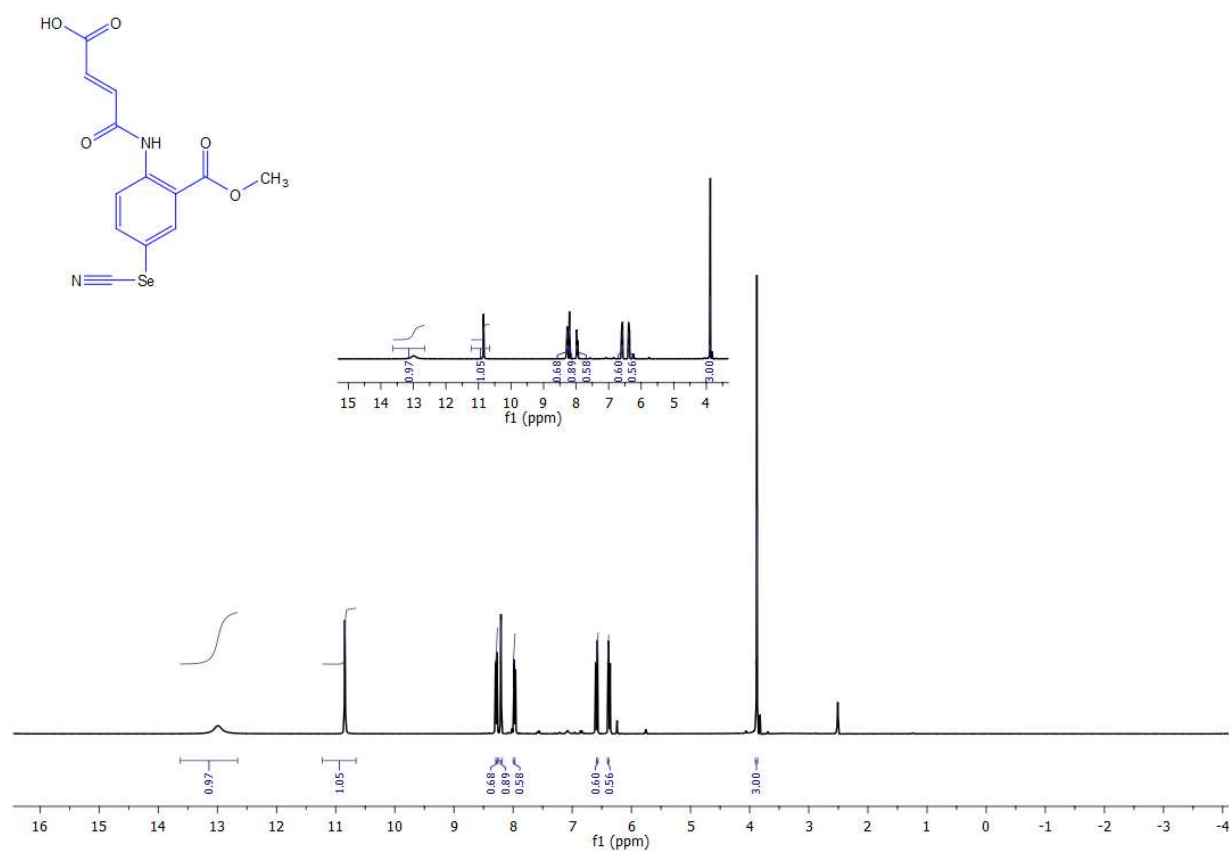

<sup>1</sup>H NMR chart compound of **12**

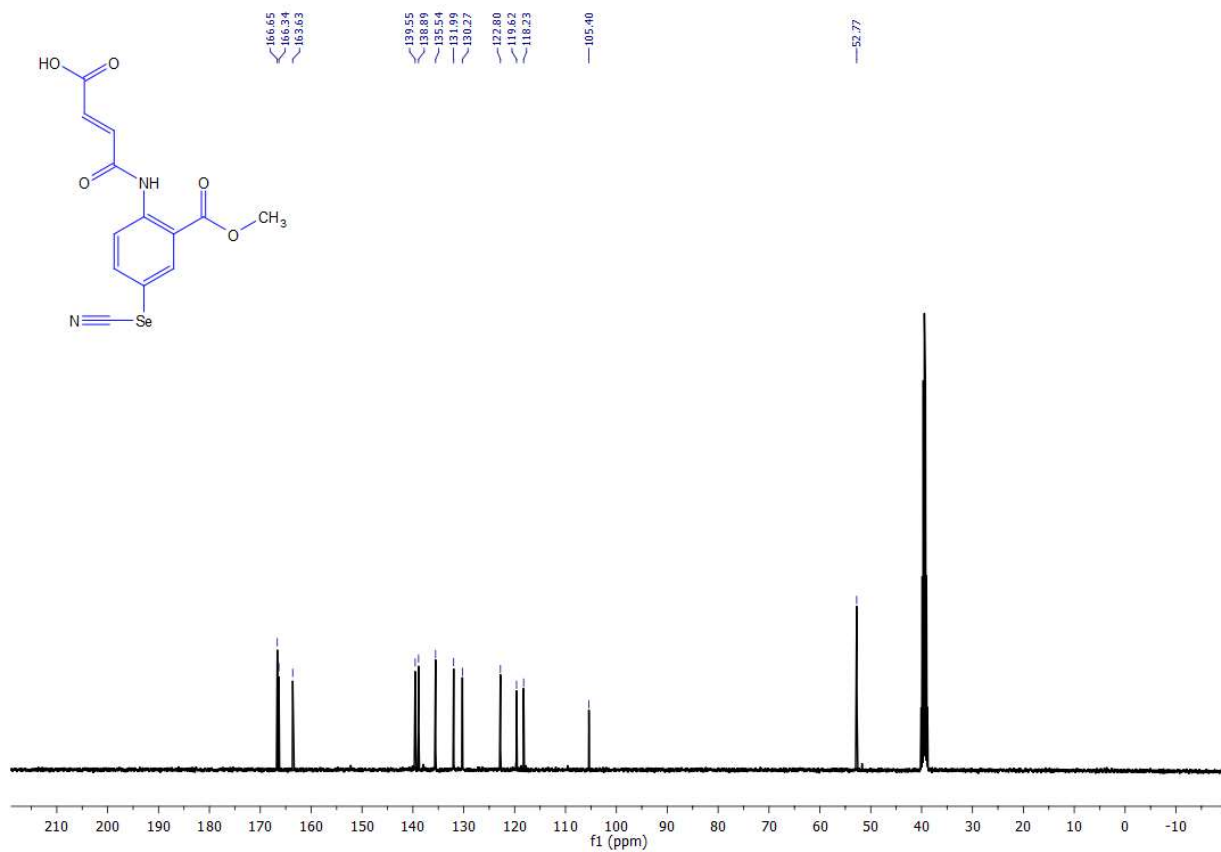

<sup>13</sup>CNMR chart compound of **12**

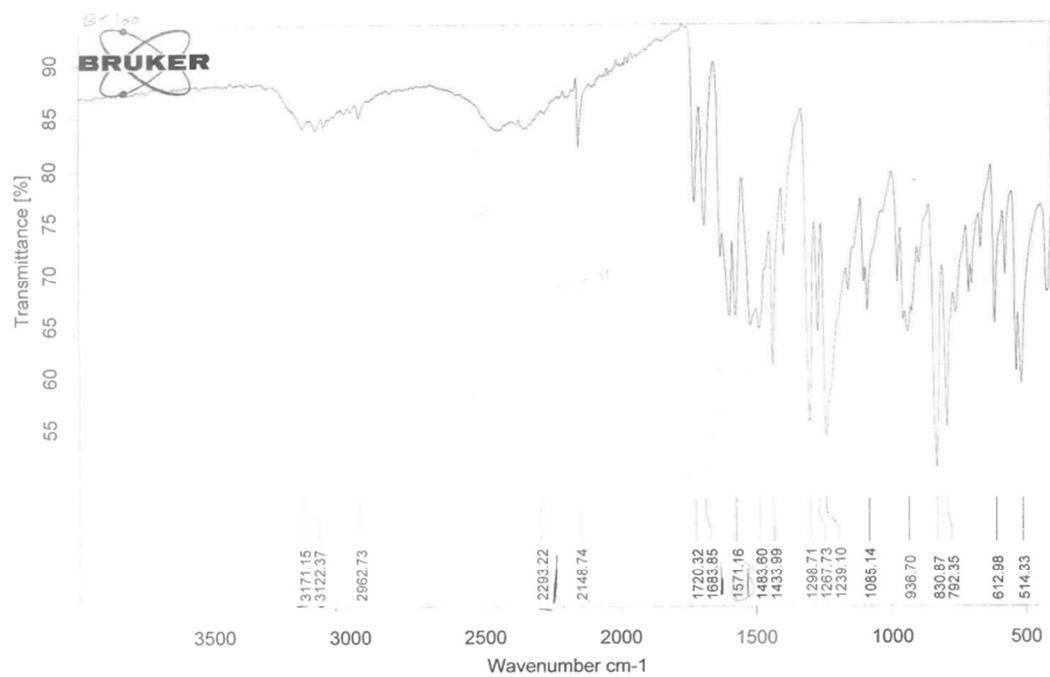

C:\Documents and Settings\adminuser\Desktop\New Folder (2)\test 1.1252

Cs004 C 18.03.2021

Instrument type and / or accessory

3/24/2021

Page 1/1

IR chart of compound 12

# Cairo University Micro Analytical Center

## DI Analysis Shimadzu Qp-2010 Plus

**Sample Information**  
 Analyzed by: Dr. Mai Younis  
 Analyzed: 03/01/2007 06:06:33  
 Sample Name: B5  
 Sample ID:  
 Customer Name: Dr. Mohamed Soliman - Science - Cairo  
 Data File: C:\GCM\Solution\Data\Project1\B5.QGD  
 Org. Data File: C:\GCM\Solution\Data\Project1\B5.QGD  
 Method File: C:\GCM\Solution\Data\Project1\High Temperature Op  
 Org. Method File: C:\GCM\Solution\Data\Project1\High Temperature Op  
 Report File:  
 Tuning File: C:\GCM\Solution\System\Tune1\default.agt  
 \$EndIf\$Modified by: Dr. Mai Younis  
 Modified: 03/01/2007 06:09:56

**Method**  
 Analytical Line 1  
 IonSourceTemp: 250.00 °C  
 [MS Table]  
 --Group 1 - Event 1--  
 Start Time: 0.00min  
 End Time: 10.00min  
 ACQ Mode: Scan  
 Event Time: 0.20sec  
 Scan Speed: 1000  
 Start m/z: 50.00  
 End m/z: 510.00  
 Electron Voltage: 70 eV  
 Ionization Mode: EI

C:\GCM\Solution\Data\Project1\B5.QGD

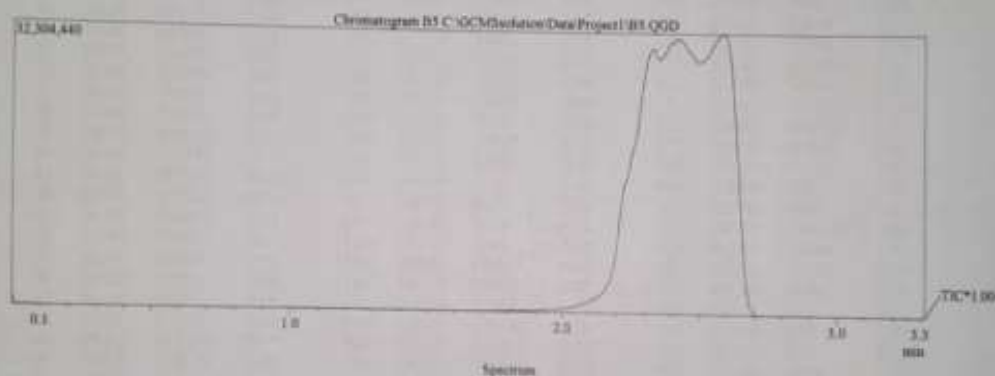

Line# 1 R-Time: 2.3 (Scan# 281)  
 MassPeak: 354  
 RawMode: Single 2.3(281) BasePeak: 144(2727225)  
 BG Mode: None Group 1 - Event 1

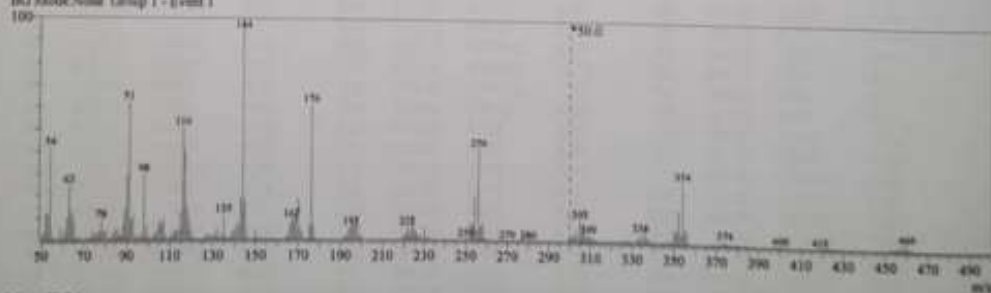

Mass Table  
 Line# 1 R-Time: 2.3 (Scan# 281)  
 MassPeak: 354  
 RawMode: Single 2.3(281) BasePeak: 144(2727225)  
 BG Mode: None Group 1 - Event 1

| # | m/z   | Abs. In | Rel. Int. | # | m/z   | Abs. In | Rel. Int. | # | m/z   | Abs. In | Rel. Int. |
|---|-------|---------|-----------|---|-------|---------|-----------|---|-------|---------|-----------|
| 1 | 50.10 | 36854   | 1.35      | 4 | 53.05 | 308536  | 11.31     | 7 | 56.00 | 5962    | 0.22      |
| 2 | 51.15 | 92028   | 3.37      | 5 | 54.05 | 113633  | 41.67     | 8 | 57.05 | 3991    | 0.15      |
| 3 | 52.05 | 334080  | 12.25     | 6 | 54.95 | 60167   | 2.21      | 9 | 58.05 | 18188   | 0.67      |

Mass chart of compound 12

| #  | m/z    | Abs. In | Rel. Int. | #   | m/z    | Abs. In | Rel. Int. | #   | m/z    | Abs. In | Rel. Int. |
|----|--------|---------|-----------|-----|--------|---------|-----------|-----|--------|---------|-----------|
| 10 | 59.00  | 153724  | 5.64      | 79  | 128.05 | 66462   | 2.44      | 148 | 197.05 | 178830  | 6.56      |
| 11 | 60.05  | 18929   | 0.69      | 80  | 129.05 | 55404   | 2.03      | 149 | 198.00 | 268170  | 9.83      |
| 12 | 61.05  | 113365  | 4.16      | 81  | 130.05 | 59299   | 2.17      | 150 | 199.00 | 53169   | 1.95      |
| 13 | 62.05  | 275914  | 10.12     | 82  | 131.15 | 69102   | 2.53      | 151 | 200.00 | 42919   | 1.57      |
| 14 | 63.05  | 675014  | 24.75     | 83  | 132.10 | 136334  | 5.00      | 152 | 200.95 | 5019    | 0.18      |
| 15 | 64.05  | 362187  | 13.28     | 84  | 133.15 | 27102   | 0.99      | 153 | 201.95 | 770     | 0.03      |
| 16 | 65.05  | 249360  | 9.14      | 85  | 134.15 | 68850   | 2.52      | 154 | 203.00 | 330     | 0.01      |
| 17 | 66.00  | 43836   | 1.61      | 86  | 135.10 | 310335  | 11.38     | 155 | 204.00 | 401     | 0.01      |
| 18 | 67.05  | 21719   | 0.80      | 87  | 136.10 | 34668   | 1.27      | 156 | 205.15 | 404     | 0.01      |
| 19 | 68.00  | 21847   | 0.80      | 88  | 137.10 | 23444   | 0.86      | 157 | 206.15 | 666     | 0.02      |
| 20 | 69.00  | 18322   | 0.67      | 89  | 138.15 | 36628   | 1.34      | 158 | 207.10 | 1129    | 0.04      |
| 21 | 70.05  | 9114    | 0.33      | 90  | 139.05 | 100234  | 3.68      | 159 | 208.10 | 2690    | 0.10      |
| 22 | 71.05  | 23538   | 0.86      | 91  | 140.05 | 119319  | 4.38      | 160 | 209.05 | 3293    | 0.12      |
| 23 | 72.05  | 26252   | 0.96      | 92  | 141.05 | 209223  | 7.67      | 161 | 210.05 | 5609    | 0.21      |
| 24 | 72.95  | 33369   | 1.22      | 93  | 142.15 | 171704  | 6.30      | 162 | 211.15 | 2468    | 0.09      |
| 25 | 74.00  | 98111   | 3.60      | 94  | 143.15 | 527320  | 19.34     | 163 | 212.05 | 10017   | 0.37      |
| 26 | 75.05  | 83063   | 3.05      | 95  | 144.05 | 272722  | 100.00    | 164 | 213.05 | 2211    | 0.08      |
| 27 | 76.05  | 78498   | 2.88      | 96  | 145.05 | 501561  | 18.39     | 165 | 214.05 | 2157    | 0.08      |
| 28 | 77.05  | 113128  | 4.15      | 97  | 146.05 | 55014   | 2.02      | 166 | 215.00 | 639     | 0.02      |
| 29 | 78.00  | 251254  | 9.21      | 98  | 147.05 | 6374    | 0.23      | 167 | 216.00 | 292     | 0.01      |
| 30 | 79.05  | 121981  | 4.47      | 99  | 148.15 | 3640    | 0.13      | 168 | 217.05 | 707     | 0.03      |
| 31 | 80.05  | 113953  | 4.18      | 100 | 149.15 | 16853   | 0.62      | 169 | 218.05 | 5687    | 0.21      |
| 32 | 81.45  | 18475   | 0.68      | 101 | 150.10 | 119026  | 4.36      | 170 | 219.05 | 6945    | 0.25      |
| 33 | 82.35  | 27314   | 1.00      | 102 | 151.05 | 30054   | 1.10      | 171 | 220.05 | 55818   | 2.05      |
| 34 | 83.45  | 68966   | 2.53      | 103 | 152.05 | 9544    | 0.33      | 172 | 221.05 | 77349   | 2.84      |
| 35 | 84.35  | 114881  | 4.21      | 104 | 153.00 | 14017   | 0.51      | 173 | 222.00 | 161090  | 5.91      |
| 36 | 85.45  | 136593  | 5.01      | 105 | 154.00 | 13289   | 0.49      | 174 | 223.05 | 90269   | 3.31      |
| 37 | 86.35  | 50268   | 1.84      | 106 | 155.00 | 13065   | 0.48      | 175 | 224.05 | 305493  | 11.20     |
| 38 | 87.00  | 51103   | 1.87      | 107 | 156.00 | 9850    | 0.36      | 176 | 225.00 | 148222  | 5.43      |
| 39 | 88.05  | 173126  | 6.35      | 108 | 157.00 | 11946   | 0.44      | 177 | 226.00 | 96809   | 3.55      |
| 40 | 89.05  | 372750  | 13.67     | 109 | 158.00 | 11722   | 0.43      | 178 | 227.05 | 56561   | 2.07      |
| 41 | 90.05  | 813559  | 29.83     | 110 | 159.05 | 6720    | 0.25      | 179 | 228.05 | 74727   | 2.74      |
| 42 | 91.05  | 170187  | 62.40     | 111 | 160.00 | 6337    | 0.23      | 180 | 229.05 | 19671   | 0.72      |
| 43 | 91.95  | 254923  | 9.35      | 112 | 161.05 | 2868    | 0.11      | 181 | 230.05 | 147392  | 5.40      |
| 44 | 92.95  | 306875  | 11.25     | 113 | 162.05 | 3096    | 0.11      | 182 | 230.95 | 21681   | 0.79      |
| 45 | 94.05  | 42047   | 1.54      | 114 | 163.05 | 8493    | 0.31      | 183 | 232.05 | 29392   | 1.09      |
| 46 | 95.00  | 68209   | 2.50      | 115 | 164.05 | 23248   | 0.85      | 184 | 232.95 | 4066    | 0.15      |
| 47 | 96.05  | 26677   | 0.98      | 116 | 165.05 | 77953   | 2.86      | 185 | 233.95 | 695     | 0.03      |
| 48 | 97.05  | 83330   | 3.06      | 117 | 166.05 | 178288  | 6.54      | 186 | 235.10 | 620     | 0.02      |
| 49 | 98.00  | 811457  | 29.75     | 118 | 167.05 | 251706  | 9.23      | 187 | 236.15 | 522     | 0.02      |
| 50 | 99.05  | 178261  | 6.54      | 119 | 168.05 | 308945  | 11.33     | 188 | 237.05 | 1543    | 0.06      |
| 51 | 99.95  | 45502   | 1.67      | 120 | 169.05 | 350299  | 12.84     | 189 | 238.15 | 1203    | 0.04      |
| 52 | 101.05 | 22699   | 0.83      | 121 | 170.00 | 511774  | 18.77     | 190 | 239.05 | 2314    | 0.08      |
| 53 | 102.05 | 48467   | 1.78      | 122 | 171.00 | 133118  | 4.88      | 191 | 240.15 | 1313    | 0.05      |
| 54 | 103.05 | 76487   | 2.80      | 123 | 172.00 | 94089   | 3.45      | 192 | 241.05 | 4141    | 0.15      |
| 55 | 104.05 | 115708  | 4.24      | 124 | 172.95 | 16370   | 0.60      | 193 | 242.05 | 1047    | 0.04      |
| 56 | 105.05 | 239223  | 8.77      | 125 | 174.15 | 14729   | 0.54      | 194 | 243.10 | 927     | 0.03      |
| 57 | 106.05 | 194727  | 7.14      | 126 | 175.15 | 177706  | 6.52      | 195 | 244.10 | 714     | 0.03      |
| 58 | 107.05 | 258682  | 9.49      | 127 | 176.10 | 166848  | 61.18     | 196 | 245.05 | 338     | 0.01      |
| 59 | 108.05 | 59941   | 2.20      | 128 | 177.05 | 193913  | 7.11      | 197 | 246.05 | 444     | 0.02      |
| 60 | 109.05 | 17981   | 0.66      | 129 | 178.05 | 18130   | 0.66      | 198 | 247.05 | 693     | 0.03      |
| 61 | 110.15 | 39145   | 1.44      | 130 | 179.05 | 4154    | 0.15      | 199 | 248.05 | 1034    | 0.04      |
| 62 | 111.05 | 74193   | 2.72      | 131 | 180.05 | 2520    | 0.09      | 200 | 249.05 | 2204    | 0.08      |
| 63 | 112.05 | 121769  | 4.46      | 132 | 181.00 | 5614    | 0.21      | 201 | 250.05 | 18628   | 0.68      |
| 64 | 113.05 | 113883  | 4.18      | 133 | 182.00 | 3391    | 0.12      | 202 | 251.05 | 14611   | 0.54      |
| 65 | 114.10 | 125623  | 4.61      | 134 | 183.00 | 3030    | 0.11      | 203 | 252.05 | 201041  | 7.37      |
| 66 | 115.15 | 343749  | 12.60     | 135 | 184.00 | 3460    | 0.13      | 204 | 253.05 | 212145  | 7.78      |
| 67 | 116.10 | 138862  | 50.92     | 136 | 185.05 | 2707    | 0.10      | 205 | 254.05 | 542629  | 19.90     |
| 68 | 117.05 | 110546  | 40.53     | 137 | 186.00 | 2591    | 0.10      | 206 | 255.05 | 128360  | 4.71      |
| 69 | 118.05 | 379565  | 13.92     | 138 | 187.05 | 1267    | 0.05      | 207 | 256.05 | 113483  | 41.61     |
| 70 | 119.05 | 249341  | 9.14      | 139 | 187.95 | 767     | 0.03      | 208 | 256.95 | 172494  | 6.32      |
| 71 | 120.05 | 110132  | 4.04      | 140 | 189.05 | 1538    | 0.06      | 209 | 258.00 | 225121  | 8.25      |
| 72 | 121.05 | 23711   | 0.87      | 141 | 190.05 | 7429    | 0.27      | 210 | 258.95 | 30980   | 1.14      |
| 73 | 122.05 | 13811   | 0.51      | 142 | 191.05 | 13189   | 0.48      | 211 | 259.95 | 3071    | 0.11      |
| 74 | 123.10 | 5474    | 0.20      | 143 | 192.05 | 40634   | 1.49      | 212 | 261.10 | 630     | 0.02      |
| 75 | 124.15 | 3658    | 0.13      | 144 | 193.05 | 74043   | 2.71      | 213 | 262.15 | 388     | 0.01      |
| 76 | 125.15 | 11348   | 0.42      | 145 | 194.05 | 146025  | 5.35      | 214 | 263.15 | 479     | 0.02      |
| 77 | 126.15 | 29401   | 1.08      | 146 | 195.05 | 162972  | 5.98      | 215 | 264.15 | 711     | 0.03      |
| 78 | 127.05 | 47592   | 1.75      | 147 | 196.00 | 260908  | 9.57      | 216 | 265.15 | 571     | 0.02      |

| #   | m/z    | Abs. In | Rel. Int. | #   | m/z    | Abs. In | Rel. Int. | #   | m/z    | Abs. In | Rel. Int. |
|-----|--------|---------|-----------|-----|--------|---------|-----------|-----|--------|---------|-----------|
| 217 | 266.10 | 1596    | 0.06      | 263 | 311.90 | 633     | 0.02      | 309 | 361.10 | 209     | 0.01      |
| 218 | 267.10 | 1270    | 0.05      | 264 | 312.95 | 495     | 0.02      | 310 | 363.10 | 214     | 0.01      |
| 219 | 268.10 | 2274    | 0.08      | 265 | 313.90 | 377     | 0.01      | 311 | 368.10 | 286     | 0.01      |
| 220 | 269.15 | 814     | 0.03      | 266 | 315.05 | 543     | 0.02      | 312 | 369.10 | 241     | 0.01      |
| 221 | 270.05 | 3991    | 0.15      | 267 | 316.00 | 270     | 0.01      | 313 | 370.30 | 386     | 0.01      |
| 222 | 271.05 | 896     | 0.03      | 268 | 316.90 | 414     | 0.02      | 314 | 371.25 | 467     | 0.02      |
| 223 | 272.10 | 1108    | 0.04      | 269 | 317.90 | 255     | 0.01      | 315 | 372.20 | 591     | 0.02      |
| 224 | 273.10 | 751     | 0.03      | 270 | 319.00 | 364     | 0.01      | 316 | 373.15 | 618     | 0.02      |
| 225 | 274.15 | 765     | 0.03      | 271 | 319.95 | 386     | 0.01      | 317 | 374.20 | 1081    | 0.04      |
| 226 | 275.05 | 1305    | 0.05      | 272 | 321.00 | 534     | 0.02      | 318 | 375.15 | 451     | 0.02      |
| 227 | 276.05 | 1083    | 0.04      | 273 | 321.95 | 395     | 0.01      | 319 | 376.25 | 480     | 0.02      |
| 228 | 277.05 | 2193    | 0.08      | 274 | 323.05 | 538     | 0.02      | 320 | 377.30 | 292     | 0.01      |
| 229 | 278.10 | 1226    | 0.04      | 275 | 324.05 | 459     | 0.02      | 321 | 378.30 | 346     | 0.01      |
| 230 | 279.10 | 1086    | 0.04      | 276 | 325.05 | 459     | 0.02      | 322 | 379.30 | 249     | 0.01      |
| 231 | 280.10 | 740     | 0.03      | 277 | 326.00 | 810     | 0.03      | 323 | 380.30 | 436     | 0.02      |
| 232 | 281.10 | 561     | 0.02      | 278 | 327.00 | 639     | 0.02      | 324 | 381.30 | 222     | 0.01      |
| 233 | 282.05 | 490     | 0.02      | 279 | 327.95 | 896     | 0.03      | 325 | 383.30 | 207     | 0.01      |
| 234 | 283.10 | 522     | 0.02      | 280 | 328.95 | 647     | 0.02      | 326 | 384.30 | 217     | 0.01      |
| 235 | 284.15 | 455     | 0.02      | 281 | 330.10 | 415     | 0.02      | 327 | 385.30 | 239     | 0.01      |
| 236 | 285.15 | 397     | 0.01      | 282 | 331.10 | 276     | 0.01      | 328 | 386.30 | 249     | 0.01      |
| 237 | 286.10 | 284     | 0.01      | 283 | 332.10 | 1038    | 0.04      | 329 | 397.30 | 201     | 0.01      |
| 238 | 287.10 | 321     | 0.01      | 284 | 333.10 | 1103    | 0.04      | 330 | 398.30 | 278     | 0.01      |
| 239 | 288.10 | 284     | 0.01      | 285 | 334.10 | 2478    | 0.09      | 331 | 399.30 | 252     | 0.01      |
| 240 | 289.10 | 281     | 0.01      | 286 | 335.15 | 897     | 0.03      | 332 | 400.30 | 311     | 0.01      |
| 241 | 290.10 | 270     | 0.01      | 287 | 336.10 | 4783    | 0.18      | 333 | 401.30 | 217     | 0.01      |
| 242 | 291.10 | 409     | 0.01      | 288 | 337.05 | 1244    | 0.05      | 334 | 410.00 | 257     | 0.01      |
| 243 | 292.10 | 302     | 0.01      | 289 | 338.10 | 1177    | 0.04      | 335 | 420.05 | 445     | 0.02      |
| 244 | 293.10 | 631     | 0.02      | 290 | 339.05 | 536     | 0.02      | 336 | 421.00 | 236     | 0.01      |
| 245 | 294.10 | 358     | 0.01      | 291 | 339.90 | 244     | 0.01      | 337 | 422.00 | 599     | 0.02      |
| 246 | 295.10 | 825     | 0.03      | 292 | 340.90 | 473     | 0.02      | 338 | 423.00 | 303     | 0.01      |
| 247 | 295.90 | 386     | 0.01      | 293 | 343.20 | 374     | 0.01      | 339 | 424.00 | 249     | 0.01      |
| 248 | 297.10 | 410     | 0.02      | 294 | 344.40 | 369     | 0.01      | 340 | 425.00 | 212     | 0.01      |
| 249 | 298.10 | 230     | 0.01      | 295 | 345.25 | 428     | 0.02      | 341 | 426.00 | 246     | 0.01      |
| 250 | 299.10 | 270     | 0.01      | 296 | 346.25 | 416     | 0.02      | 342 | 427.00 | 233     | 0.01      |
| 251 | 300.15 | 928     | 0.03      | 297 | 347.25 | 665     | 0.02      | 343 | 429.00 | 204     | 0.01      |
| 252 | 301.05 | 1281    | 0.05      | 298 | 348.20 | 924     | 0.03      | 344 | 451.85 | 323     | 0.01      |
| 253 | 302.05 | 1551    | 0.06      | 299 | 349.15 | 587     | 0.02      | 345 | 452.80 | 359     | 0.01      |
| 254 | 303.05 | 2584    | 0.09      | 300 | 350.15 | 3506    | 0.13      | 346 | 454.15 | 564     | 0.02      |
| 255 | 304.05 | 1438    | 0.05      | 301 | 351.15 | 5489    | 0.13      | 347 | 455.15 | 452     | 0.02      |
| 256 | 305.05 | 5392    | 0.20      | 302 | 352.10 | 8292    | 0.30      | 348 | 456.05 | 938     | 0.03      |
| 257 | 306.05 | 1753    | 0.06      | 303 | 353.15 | 2597    | 0.10      | 349 | 457.15 | 706     | 0.03      |
| 258 | 307.05 | 2202    | 0.08      | 304 | 354.10 | 15337   | 0.56      | 350 | 458.10 | 1394    | 0.05      |
| 259 | 308.05 | 1436    | 0.05      | 305 | 355.05 | 3542    | 0.13      | 351 | 459.15 | 572     | 0.02      |
| 260 | 309.10 | 1721    | 0.06      | 306 | 356.10 | 3410    | 0.13      | 352 | 460.15 | 1574    | 0.06      |
| 261 | 310.05 | 1363    | 0.05      | 307 | 357.05 | 750     | 0.03      | 353 | 461.05 | 378     | 0.01      |
| 262 | 311.05 | 1171    | 0.04      | 308 | 359.10 | 204     | 0.01      | 354 | 462.10 | 476     | 0.02      |

4-((2-(methoxycarbonyl)-4-selenocyanatophenyl) amino)-4-oxobutanoic acid (**13**).

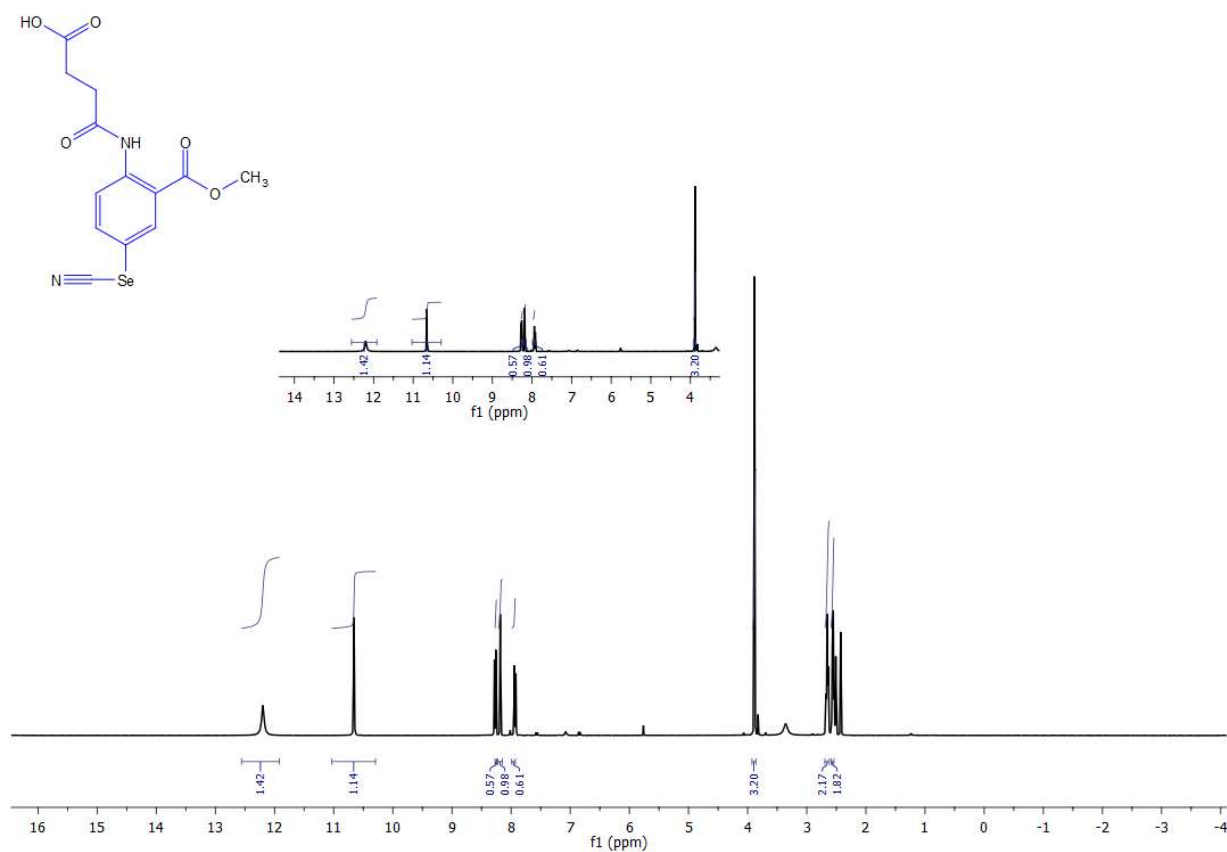

<sup>1</sup>H NMR chart of compound **13**

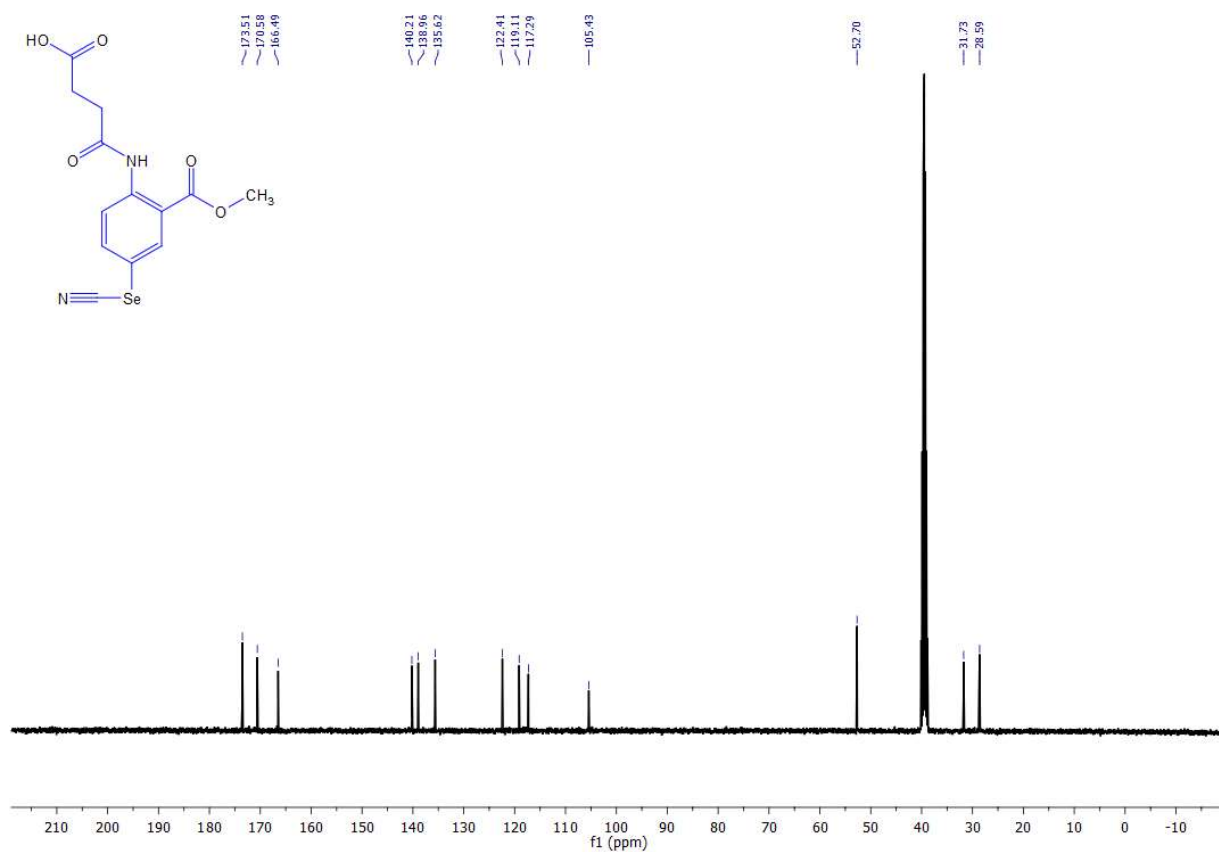

$^{13}\text{C}$ NMR chart of compound **13**

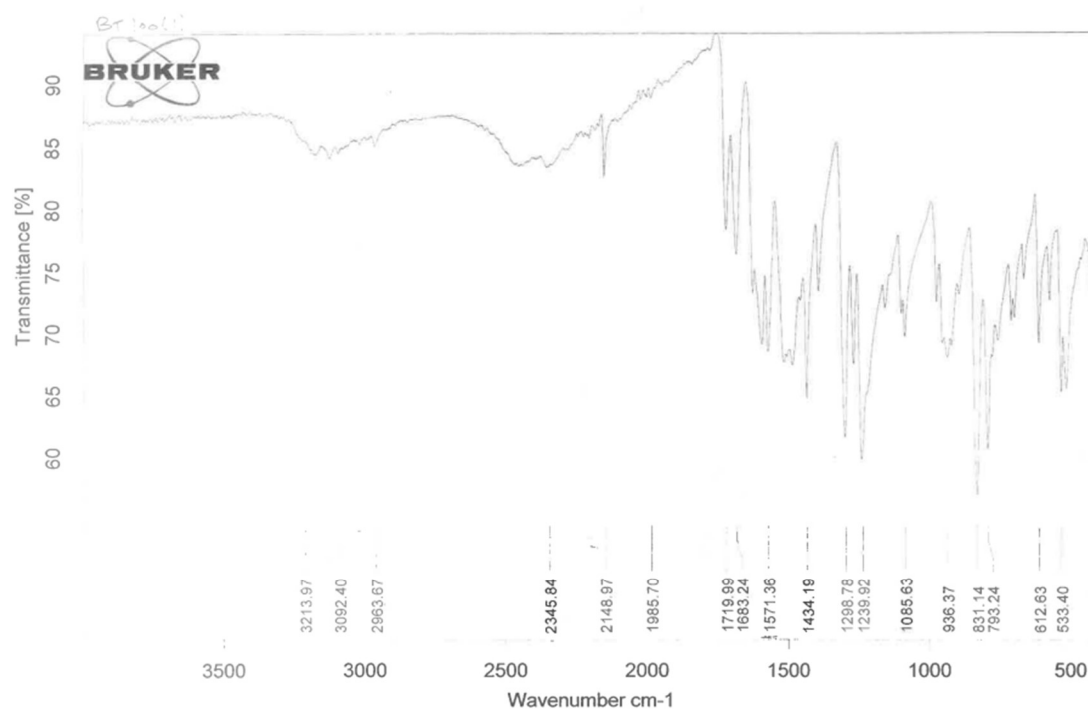

|                                                                        |          |                                    |           |
|------------------------------------------------------------------------|----------|------------------------------------|-----------|
| C:\Documents and Settings\adminuser\Desktop\New Folder (2)\test 1.1224 | FL-HG-TU | Instrument type and / or accessory | 3/16/2021 |
|------------------------------------------------------------------------|----------|------------------------------------|-----------|

Page 1/1

IR chart of compound **13**

# Cairo University Micro Analytical Center

## DI Analysis Shimadzu Qp-2010 Plus

Sample Information  
Analyzed by: Dr. Mai Younis  
Analyzed: 03/01/2007 07:56:32  
Sample Name: B7  
Sample ID:  
Customer Name: Dr. Mohamed Soliman - Science - Cairo  
Data File: C:\OCMSolution\Data\Project1\B7.QGD  
Org Data File: C:\OCMSolution\Data\Project1\B7.QGD  
Method File: C:\OCMSolution\Data\Project1\High Temperature Op  
Org Method File: C:\OCMSolution\Data\Project1\High Temperature Op  
Report File:  
Tuning File: C:\OCMSolution\System1\Tune1\_default.gp  
\$End1\$Modified by: Dr. Mai Younis  
Modified: 03/01/2007 08:00:19

Method  
Analytical Line 1  
IonSourceTemp: 250.00 °C  
[MS Table]  
-Group 1 - Event 1-  
Start Time: 0.00min  
End Time: 10.00min  
ACQ Mode: Scan  
Event Time: 0.50sec  
Scan Speed: 1000  
Start m/z: 50.00  
End m/z: 510.00  
Electron Voltage: 70 eV  
Ionization Mode: EI

C:\OCMSolution\Data\Project1\B7.QGD

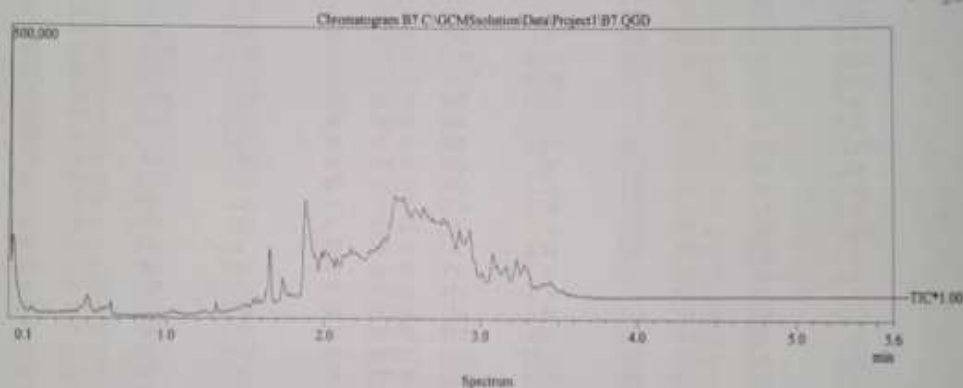

Line# 1 R.Time 2.4(Scan# 284)  
MassPeaks:153(Peak Elimination m/z: 371.30)  
RawMode:Single 2.4(284) BasePeak:59(9121)  
BG Mode:None Group 1 - Event 1

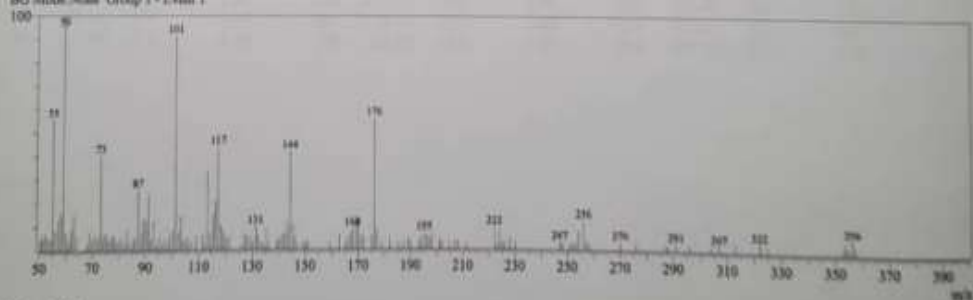

### Mass Table

Line# 1 R.Time 2.4(Scan# 284)

MassPeaks:153(Peak Elimination m/z: 371.30)

RawMode:Single 2.4(284) BasePeak:59(9121)

BG Mode:None Group 1 - Event 1

| # | m/z   | Abs. In | Rel. Int. | # | m/z   | Abs. In | Rel. Int. |
|---|-------|---------|-----------|---|-------|---------|-----------|
| 1 | 50.45 | 479     | 5.25      | 4 | 52.95 | 503     | 5.51      |
| 2 | 51.00 | 418     | 4.58      | 5 | 54.05 | 456     | 5.00      |
| 3 | 52.00 | 654     | 7.17      | 6 | 55.00 | 5094    | 55.85     |
|   |       |         |           | 7 | 55.95 | 774     | 8.49      |
|   |       |         |           | 8 | 57.05 | 1175    | 12.88     |
|   |       |         |           | 9 | 58.05 | 1464    | 16.05     |

| #  | m/z    | Abs. In | Rel. Int. | #   | m/z    | Abs. In | Rel. Int. | #   | m/z    | Abs. In | Rel. Int. |
|----|--------|---------|-----------|-----|--------|---------|-----------|-----|--------|---------|-----------|
| 10 | 59.00  | 9121    | 100.00    | 58  | 112.20 | 249     | 2.73      | 106 | 185.10 | 271     | 2.97      |
| 11 | 60.10  | 700     | 7.67      | 59  | 113.15 | 3079    | 33.76     | 107 | 187.10 | 295     | 3.23      |
| 12 | 61.00  | 313     | 3.43      | 60  | 114.10 | 686     | 7.52      | 108 | 189.10 | 401     | 4.40      |
| 13 | 62.00  | 793     | 8.69      | 61  | 115.15 | 1410    | 15.46     | 109 | 190.10 | 274     | 3.00      |
| 14 | 63.00  | 1394    | 15.28     | 62  | 116.10 | 1900    | 20.83     | 110 | 193.10 | 250     | 2.74      |
| 15 | 64.05  | 587     | 6.44      | 63  | 117.15 | 4007    | 43.93     | 111 | 193.90 | 438     | 4.80      |
| 16 | 68.00  | 257     | 2.82      | 64  | 118.10 | 937     | 10.27     | 112 | 195.15 | 628     | 6.89      |
| 17 | 69.00  | 702     | 7.70      | 65  | 119.10 | 727     | 7.97      | 113 | 196.10 | 530     | 5.81      |
| 18 | 70.00  | 398     | 4.36      | 66  | 120.00 | 471     | 5.16      | 114 | 197.05 | 454     | 4.98      |
| 19 | 71.10  | 585     | 6.41      | 67  | 121.35 | 501     | 5.49      | 115 | 198.00 | 618     | 6.78      |
| 20 | 72.15  | 488     | 5.35      | 68  | 126.00 | 220     | 2.41      | 116 | 201.00 | 356     | 3.90      |
| 21 | 73.05  | 3687    | 40.42     | 69  | 127.00 | 602     | 6.60      | 117 | 202.00 | 314     | 3.44      |
| 22 | 74.10  | 556     | 6.10      | 70  | 128.10 | 521     | 5.71      | 118 | 205.00 | 268     | 2.94      |
| 23 | 75.10  | 663     | 7.27      | 71  | 129.10 | 463     | 5.08      | 119 | 207.00 | 351     | 3.85      |
| 24 | 76.00  | 369     | 4.05      | 72  | 130.10 | 361     | 3.96      | 120 | 208.15 | 344     | 3.77      |
| 25 | 77.05  | 545     | 5.98      | 73  | 131.15 | 893     | 9.79      | 121 | 211.20 | 274     | 3.00      |
| 26 | 78.00  | 574     | 6.29      | 74  | 132.10 | 534     | 5.85      | 122 | 222.00 | 873     | 9.57      |
| 27 | 79.00  | 318     | 3.49      | 75  | 133.10 | 327     | 3.59      | 123 | 223.00 | 201     | 2.20      |
| 28 | 79.90  | 446     | 4.89      | 76  | 134.10 | 209     | 2.29      | 124 | 223.95 | 782     | 8.57      |
| 29 | 81.05  | 399     | 4.37      | 77  | 135.20 | 836     | 9.17      | 125 | 225.00 | 319     | 3.50      |
| 30 | 82.00  | 222     | 2.43      | 78  | 136.20 | 321     | 3.52      | 126 | 226.00 | 250     | 2.74      |
| 31 | 83.15  | 848     | 9.30      | 79  | 139.20 | 378     | 4.14      | 127 | 228.00 | 450     | 4.93      |
| 32 | 84.10  | 265     | 2.91      | 80  | 140.00 | 402     | 4.41      | 128 | 230.00 | 286     | 3.14      |
| 33 | 85.30  | 417     | 4.57      | 81  | 141.00 | 591     | 6.48      | 129 | 247.00 | 310     | 3.40      |
| 34 | 86.15  | 456     | 5.00      | 82  | 142.00 | 598     | 6.56      | 130 | 248.00 | 303     | 3.32      |
| 35 | 87.10  | 2335    | 25.60     | 83  | 143.10 | 1033    | 11.33     | 131 | 251.00 | 241     | 2.64      |
| 36 | 88.20  | 636     | 6.97      | 84  | 144.10 | 3812    | 41.79     | 132 | 252.00 | 262     | 2.87      |
| 37 | 89.15  | 1264    | 13.86     | 85  | 145.15 | 968     | 10.61     | 133 | 253.00 | 295     | 3.23      |
| 38 | 90.15  | 1123    | 12.31     | 86  | 146.00 | 506     | 5.55      | 134 | 254.10 | 719     | 7.88      |
| 39 | 91.10  | 2137    | 23.43     | 87  | 147.00 | 265     | 2.91      | 135 | 256.05 | 1146    | 12.56     |
| 40 | 92.05  | 408     | 4.47      | 88  | 149.00 | 260     | 2.85      | 136 | 257.00 | 314     | 3.44      |
| 41 | 93.00  | 1156    | 12.67     | 89  | 150.00 | 343     | 3.76      | 137 | 258.00 | 266     | 2.92      |
| 42 | 94.00  | 231     | 2.53      | 90  | 151.00 | 254     | 2.78      | 138 | 270.00 | 321     | 3.52      |
| 43 | 95.10  | 506     | 5.55      | 91  | 159.00 | 252     | 2.76      | 139 | 276.00 | 257     | 2.82      |
| 44 | 96.10  | 242     | 2.65      | 92  | 162.80 | 562     | 6.16      | 140 | 287.00 | 220     | 2.41      |
| 45 | 97.30  | 462     | 5.07      | 93  | 165.00 | 236     | 2.59      | 141 | 288.00 | 202     | 2.21      |
| 46 | 98.30  | 252     | 2.76      | 94  | 166.00 | 434     | 4.76      | 142 | 291.00 | 292     | 3.20      |
| 47 | 99.15  | 556     | 6.10      | 95  | 167.00 | 610     | 6.69      | 143 | 296.00 | 222     | 2.43      |
| 48 | 100.15 | 784     | 8.60      | 96  | 167.95 | 794     | 8.71      | 144 | 304.00 | 207     | 2.27      |
| 49 | 101.10 | 8338    | 91.42     | 97  | 169.00 | 1034    | 11.34     | 145 | 307.00 | 246     | 2.70      |
| 50 | 102.15 | 677     | 7.42      | 98  | 170.00 | 1202    | 13.18     | 146 | 313.00 | 351     | 3.85      |
| 51 | 103.10 | 1345    | 14.75     | 99  | 171.10 | 588     | 6.45      | 147 | 322.00 | 356     | 3.90      |
| 52 | 104.10 | 334     | 3.66      | 100 | 172.10 | 422     | 4.63      | 148 | 325.00 | 241     | 2.64      |
| 53 | 105.20 | 450     | 4.93      | 101 | 175.15 | 491     | 5.38      | 149 | 353.00 | 218     | 2.39      |
| 54 | 106.20 | 390     | 4.28      | 102 | 176.10 | 5108    | 56.00     | 150 | 353.75 | 429     | 4.70      |
| 55 | 107.20 | 313     | 3.43      | 103 | 177.10 | 766     | 8.40      | 151 | 354.80 | 233     | 2.55      |
| 56 | 109.10 | 554     | 6.07      | 104 | 179.10 | 263     | 2.88      | 152 | 356.30 | 585     | 6.41      |
| 57 | 111.30 | 574     | 6.29      | 105 | 182.10 | 412     | 4.52      | 153 | 357.30 | 222     | 2.43      |

*Methyl 2-(2-chloroacetamido)-5-selenocyanatobenzoate (14).*

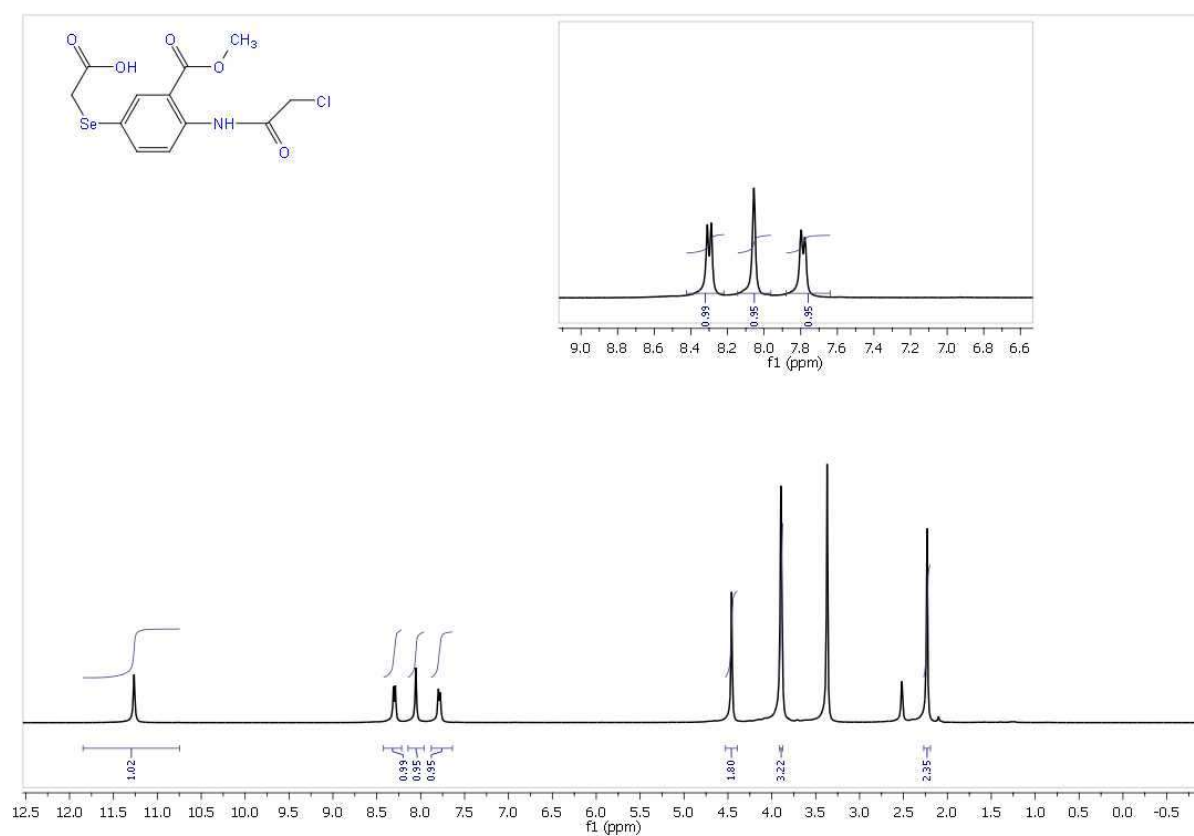

<sup>1</sup>H NMR chart of compound 14

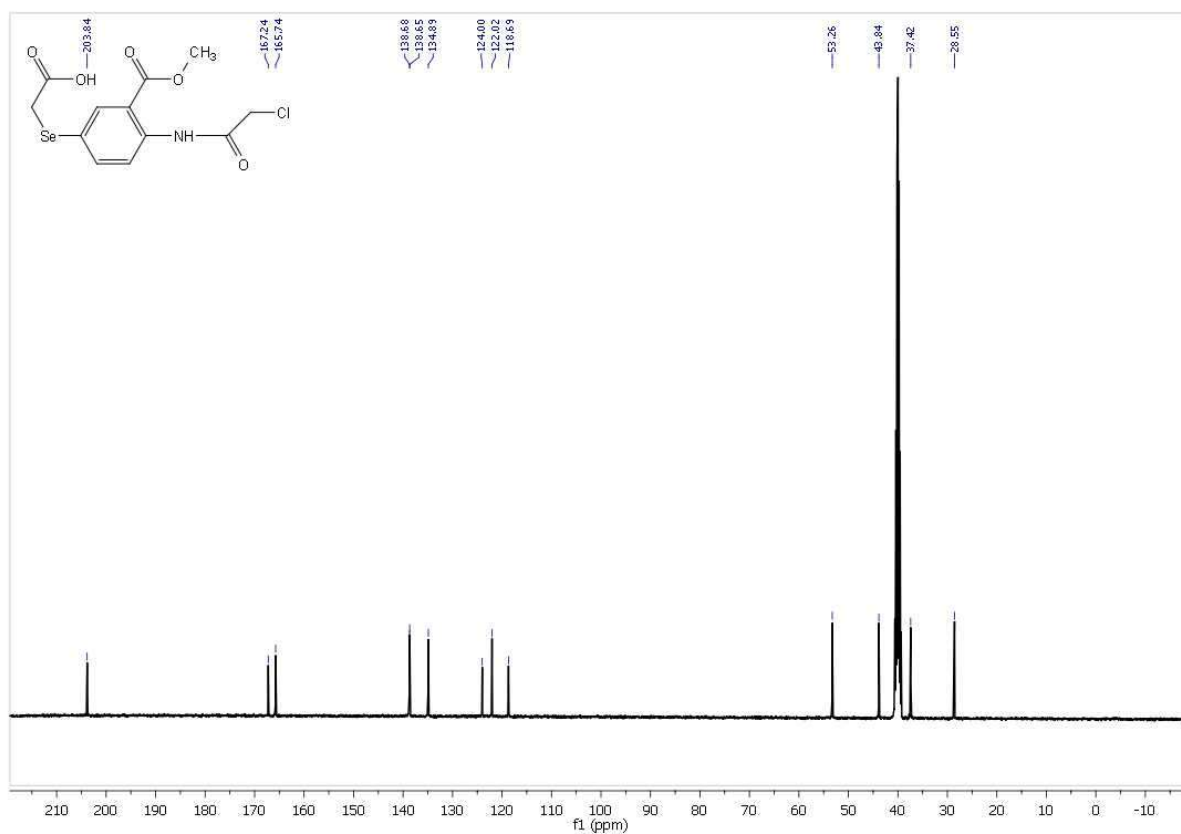

<sup>13</sup>CNMR chart of compound 14

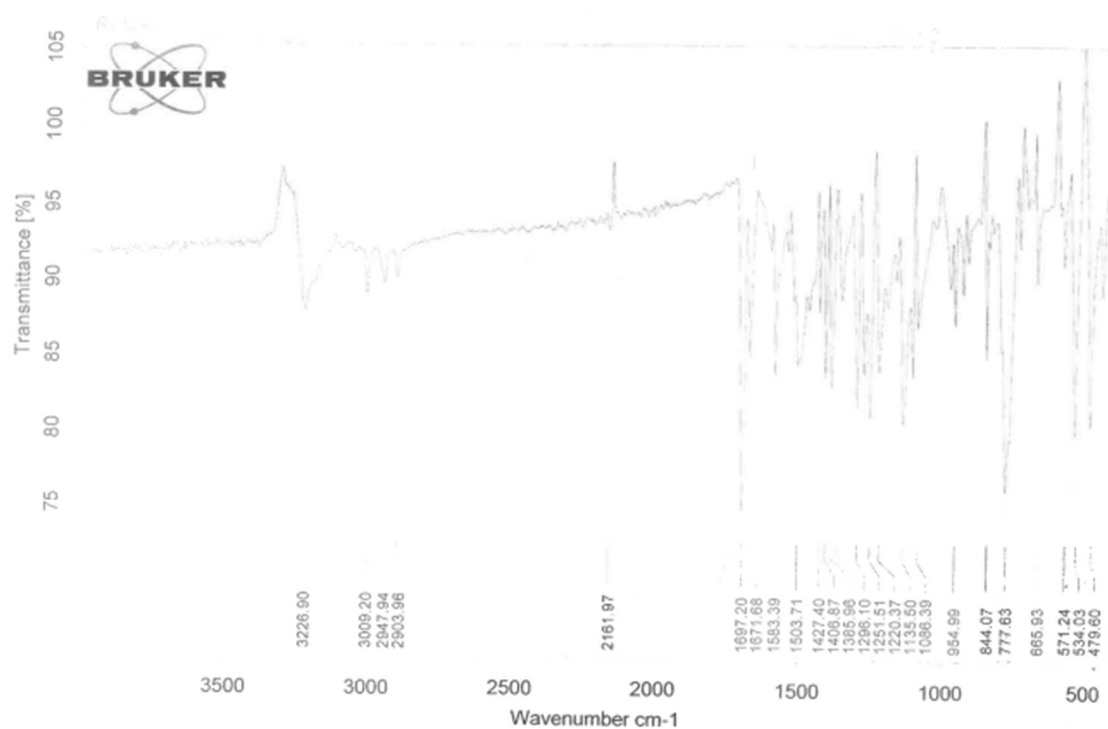

IR chart of compound 14

# Cairo University Micro Analytical Center

DI Analysis  
Shimadzu Qp-2010 Plus

Sample Information  
Analyzed by: Dr. Mai Younis  
Analyzed: 03/01/2007 08:07:39  
Sample Name: B14  
Sample ID:  
Customer Name: Dr. Mohamed Soliman - Science - Cairo  
Data File: C:\GCM\Solution\Data\Project1\B14.QGD  
Orig Data File: C:\GCM\Solution\Data\Project1\B14.QGD  
Method File: C:\GCM\Solution\Data\Project1\High Temperature Op  
Orig Method File: C:\GCM\Solution\Data\Project1\High Temperature Op  
Report File:  
Tuning File: C:\GCM\Solution\System\Tune1\_default.gct  
Std115 Modified by: Dr. Mai Younis  
Modified: 03/01/2007 08:10:32

Method  
Analytical Line 1  
IonSourceTemp: 250.00 °C  
[MS Table]  
--Group 1 - Event 1--  
Start Time: 0.00min  
End Time: 10.00min  
ACQ Mode: Scan  
Event Time: 0.50min  
Scan Speed: 1000  
Start m/z: 50.00  
End m/z: 510.00  
Electron Voltage: 70 eV  
Ionization Mode: EI

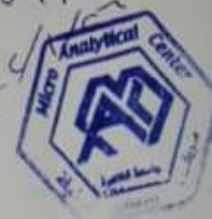

C:\GCM\Solution\Data\Project1\B14.QGD

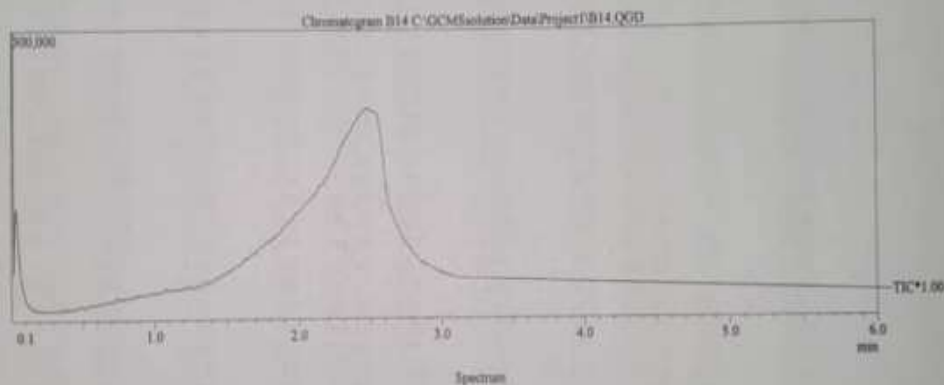

Line#1 RTime:2.5(Scan#298)

MassPeaks:198

RawMode:Single 2.5(298) BasePeak:77(10097)

BQ Mode:None Group 1 - Event 1

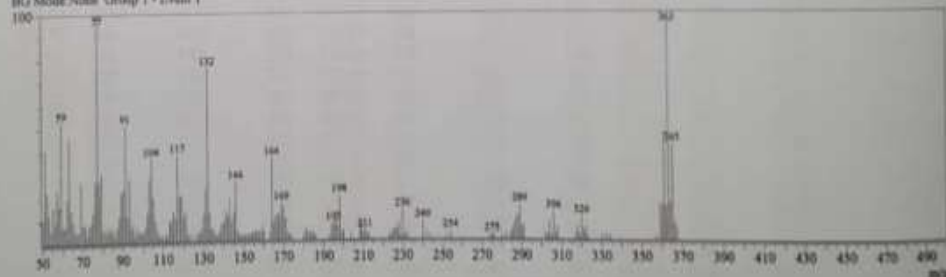

Mass Table

Line#1 RTime:2.5(Scan#298)

MassPeaks:198

RawMode:Single 2.5(298) BasePeak:77(10097)

BQ Mode:None Group 1 - Event 1

| # | m/z   | Abs. Int. | Rel. Int. | # | m/z   | Abs. Int. | Rel. Int. | # | m/z   | Abs. Int. | Rel. Int. |
|---|-------|-----------|-----------|---|-------|-----------|-----------|---|-------|-----------|-----------|
| 1 | 50.05 | 1090      | 10.80     | 4 | 53.00 | 1297      | 12.85     | 7 | 56.10 | 962       | 9.53      |
| 2 | 51.00 | 4151      | 41.11     | 5 | 54.05 | 547       | 5.42      | 8 | 57.05 | 2388      | 23.65     |
| 3 | 52.00 | 2271      | 22.49     | 6 | 55.05 | 1624      | 16.08     | 9 | 58.05 | 1652      | 16.36     |

| #  | m/z    | Abs. Int. | Rel. Int. | #   | m/z    | Abs. Int. | Rel. Int. | #   | m/z    | Abs. Int. | Rel. Int. |
|----|--------|-----------|-----------|-----|--------|-----------|-----------|-----|--------|-----------|-----------|
| 10 | 59.05  | 5375      | 53.23     | 73  | 122.10 | 305       | 3.02      | 136 | 199.95 | 397       | 3.93      |
| 11 | 60.05  | 723       | 7.16      | 74  | 123.15 | 379       | 3.75      | 137 | 204.00 | 306       | 3.03      |
| 12 | 61.05  | 771       | 7.64      | 75  | 125.10 | 305       | 3.02      | 138 | 208.05 | 428       | 4.24      |
| 13 | 62.05  | 1966      | 19.47     | 76  | 127.10 | 345       | 3.42      | 139 | 209.10 | 678       | 6.71      |
| 14 | 63.05  | 4672      | 46.27     | 77  | 128.15 | 441       | 4.37      | 140 | 209.95 | 360       | 3.57      |
| 15 | 64.00  | 1495      | 14.81     | 78  | 129.15 | 534       | 5.29      | 141 | 211.00 | 426       | 4.22      |
| 16 | 65.05  | 992       | 9.82      | 79  | 130.15 | 1236      | 12.24     | 142 | 212.05 | 347       | 3.44      |
| 17 | 66.00  | 530       | 5.25      | 80  | 131.15 | 2322      | 23.00     | 143 | 213.00 | 201       | 1.99      |
| 18 | 67.00  | 484       | 4.79      | 81  | 132.15 | 7716      | 76.42     | 144 | 223.00 | 257       | 2.55      |
| 19 | 68.05  | 493       | 4.88      | 82  | 133.15 | 1294      | 12.82     | 145 | 224.00 | 206       | 2.04      |
| 20 | 69.00  | 2700      | 26.74     | 83  | 134.10 | 590       | 5.84      | 146 | 225.00 | 444       | 4.40      |
| 21 | 70.10  | 855       | 8.47      | 84  | 135.15 | 567       | 5.62      | 147 | 225.95 | 462       | 4.58      |
| 22 | 71.10  | 850       | 8.42      | 85  | 136.10 | 276       | 2.73      | 148 | 227.00 | 482       | 4.77      |
| 23 | 72.05  | 349       | 3.46      | 86  | 137.10 | 258       | 2.56      | 149 | 228.00 | 754       | 7.47      |
| 24 | 73.05  | 778       | 7.71      | 87  | 138.05 | 459       | 4.55      | 150 | 229.00 | 202       | 2.00      |
| 25 | 74.05  | 908       | 8.99      | 88  | 139.00 | 788       | 7.80      | 151 | 230.00 | 1342      | 13.29     |
| 26 | 75.05  | 1374      | 13.61     | 89  | 140.00 | 862       | 8.54      | 152 | 231.00 | 217       | 2.15      |
| 27 | 76.05  | 2727      | 27.01     | 90  | 141.05 | 1316      | 13.03     | 153 | 232.00 | 335       | 3.32      |
| 28 | 77.00  | 10097     | 100.00    | 91  | 142.00 | 1119      | 11.08     | 154 | 240.10 | 834       | 8.26      |
| 29 | 78.05  | 2741      | 27.15     | 92  | 143.00 | 1940      | 19.21     | 155 | 242.10 | 386       | 3.82      |
| 30 | 79.05  | 3075      | 30.45     | 93  | 144.05 | 916       | 9.07      | 156 | 244.10 | 241       | 2.39      |
| 31 | 79.95  | 532       | 5.27      | 94  | 145.10 | 1279      | 12.67     | 157 | 252.10 | 238       | 2.36      |
| 32 | 81.10  | 641       | 6.35      | 95  | 146.10 | 2660      | 26.34     | 158 | 254.10 | 396       | 3.92      |
| 33 | 82.15  | 425       | 4.21      | 96  | 147.10 | 425       | 4.21      | 159 | 274.10 | 220       | 2.18      |
| 34 | 83.05  | 754       | 7.47      | 97  | 148.10 | 274       | 2.71      | 160 | 275.10 | 222       | 2.20      |
| 35 | 84.10  | 489       | 4.84      | 98  | 149.10 | 249       | 2.47      | 161 | 276.10 | 217       | 2.15      |
| 36 | 85.05  | 645       | 6.39      | 99  | 150.10 | 242       | 2.40      | 162 | 280.10 | 233       | 2.31      |
| 37 | 86.00  | 262       | 2.59      | 100 | 151.10 | 254       | 2.52      | 163 | 282.10 | 383       | 3.79      |
| 38 | 87.05  | 694       | 6.87      | 101 | 152.10 | 300       | 2.97      | 164 | 284.10 | 270       | 2.67      |
| 39 | 88.05  | 1167      | 11.56     | 102 | 153.10 | 297       | 2.94      | 165 | 285.15 | 427       | 4.23      |
| 40 | 89.05  | 2214      | 21.93     | 103 | 154.10 | 353       | 3.50      | 166 | 286.10 | 724       | 7.17      |
| 41 | 90.05  | 2389      | 23.66     | 104 | 154.95 | 373       | 3.69      | 167 | 287.10 | 980       | 9.71      |
| 42 | 91.05  | 5196      | 51.46     | 105 | 155.95 | 436       | 4.32      | 168 | 288.15 | 1091      | 10.81     |
| 43 | 92.05  | 1152      | 11.41     | 106 | 156.90 | 462       | 4.58      | 169 | 289.10 | 1551      | 15.36     |
| 44 | 93.00  | 2841      | 28.14     | 107 | 158.00 | 372       | 3.68      | 170 | 290.10 | 545       | 5.40      |
| 45 | 94.05  | 653       | 6.47      | 108 | 159.10 | 663       | 6.57      | 171 | 291.10 | 638       | 6.32      |
| 46 | 95.00  | 846       | 8.38      | 109 | 160.10 | 450       | 4.46      | 172 | 302.10 | 295       | 2.92      |
| 47 | 96.00  | 342       | 3.39      | 110 | 163.15 | 374       | 3.70      | 173 | 303.10 | 218       | 2.16      |
| 48 | 97.10  | 638       | 6.32      | 111 | 164.10 | 3703      | 36.67     | 174 | 304.05 | 761       | 7.54      |
| 49 | 98.15  | 447       | 4.43      | 112 | 165.05 | 787       | 7.79      | 175 | 305.10 | 303       | 3.00      |
| 50 | 99.10  | 473       | 4.68      | 113 | 166.00 | 1057      | 10.47     | 176 | 306.10 | 1258      | 12.46     |
| 51 | 100.10 | 455       | 4.51      | 114 | 167.00 | 1218      | 12.06     | 177 | 307.05 | 294       | 2.91      |
| 52 | 101.10 | 727       | 7.20      | 115 | 168.00 | 1145      | 11.34     | 178 | 308.05 | 602       | 5.96      |
| 53 | 102.10 | 1308      | 12.95     | 116 | 169.00 | 1697      | 16.81     | 179 | 317.20 | 294       | 2.91      |
| 54 | 103.10 | 2826      | 27.99     | 117 | 170.00 | 1476      | 14.62     | 180 | 318.15 | 618       | 6.12      |
| 55 | 104.10 | 3727      | 36.91     | 118 | 170.95 | 972       | 9.63      | 181 | 319.10 | 249       | 2.47      |
| 56 | 105.10 | 1961      | 19.42     | 119 | 171.95 | 408       | 4.04      | 182 | 320.15 | 1053      | 10.43     |
| 57 | 106.10 | 969       | 9.60      | 120 | 172.90 | 239       | 2.37      | 183 | 321.10 | 423       | 4.19      |
| 58 | 107.05 | 557       | 5.52      | 121 | 173.90 | 268       | 2.65      | 184 | 322.15 | 636       | 6.30      |
| 59 | 108.00 | 287       | 2.84      | 122 | 179.90 | 257       | 2.55      | 185 | 323.10 | 239       | 2.37      |
| 60 | 109.00 | 286       | 2.83      | 123 | 181.00 | 570       | 5.65      | 186 | 330.10 | 250       | 2.48      |
| 61 | 110.00 | 220       | 2.18      | 124 | 182.00 | 396       | 3.92      | 187 | 332.10 | 305       | 3.02      |
| 62 | 111.20 | 383       | 3.79      | 125 | 183.10 | 350       | 3.47      | 188 | 334.10 | 220       | 2.18      |
| 63 | 112.10 | 276       | 2.73      | 126 | 184.05 | 406       | 4.02      | 189 | 357.10 | 201       | 1.99      |
| 64 | 113.10 | 918       | 9.09      | 127 | 185.10 | 311       | 3.08      | 190 | 359.15 | 1587      | 15.72     |
| 65 | 114.10 | 972       | 9.63      | 128 | 186.10 | 238       | 2.36      | 191 | 360.20 | 1617      | 16.01     |
| 66 | 115.05 | 1352      | 13.39     | 129 | 193.00 | 204       | 2.02      | 192 | 361.15 | 4820      | 47.74     |
| 67 | 116.15 | 1082      | 10.72     | 130 | 194.00 | 607       | 6.01      | 193 | 362.15 | 1557      | 15.42     |
| 68 | 117.05 | 3863      | 38.26     | 131 | 195.05 | 754       | 7.47      | 194 | 363.15 | 9621      | 95.29     |
| 69 | 118.10 | 2014      | 19.95     | 132 | 196.00 | 1270      | 12.58     | 195 | 364.15 | 1668      | 16.52     |
| 70 | 119.05 | 2066      | 20.46     | 133 | 197.05 | 648       | 6.42      | 196 | 365.15 | 4257      | 42.16     |
| 71 | 120.15 | 1162      | 11.51     | 134 | 197.95 | 2002      | 19.83     | 197 | 366.15 | 848       | 8.40      |
| 72 | 121.10 | 1327      | 13.14     | 135 | 199.05 | 411       | 4.07      | 198 | 367.15 | 589       | 5.83      |

*Methyl 2-(2-phenoxyacetamido)-5-selenocyanatobenzoate (15).*

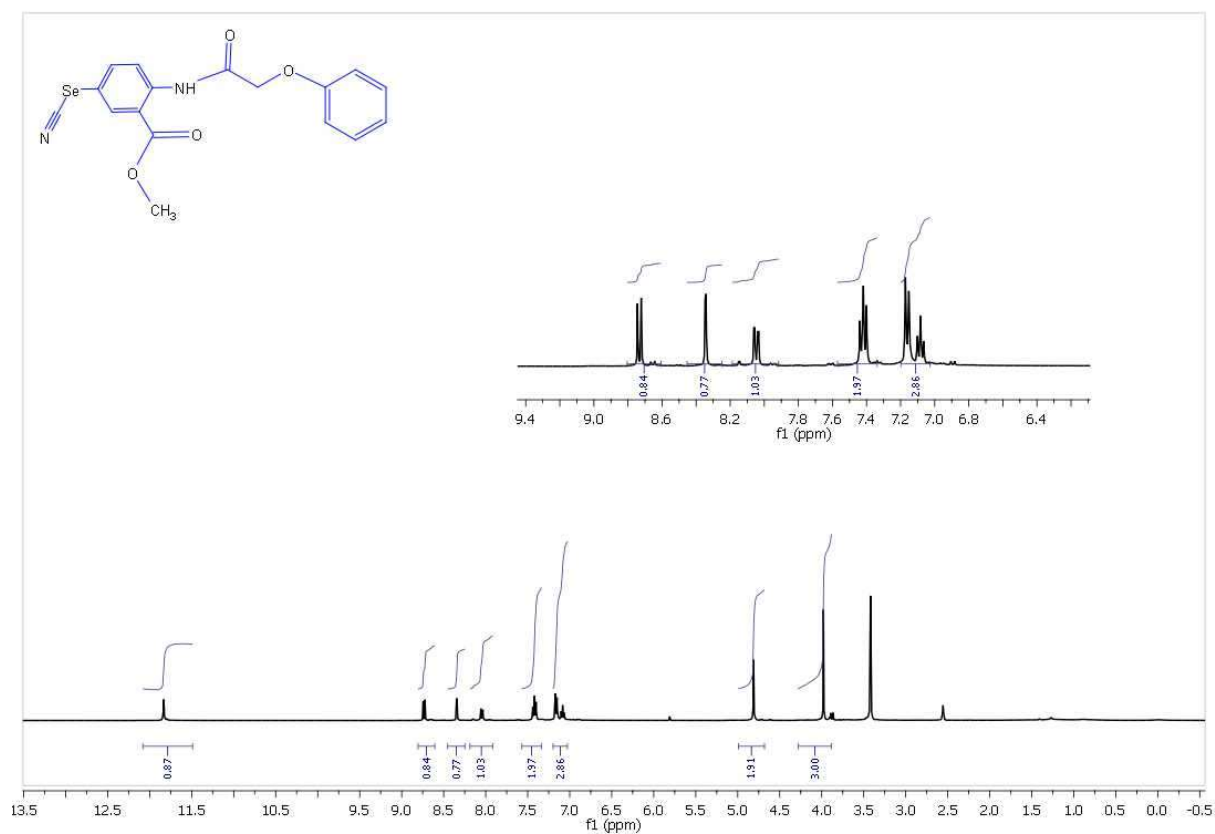

<sup>1</sup>H NMR chart of compound **15**

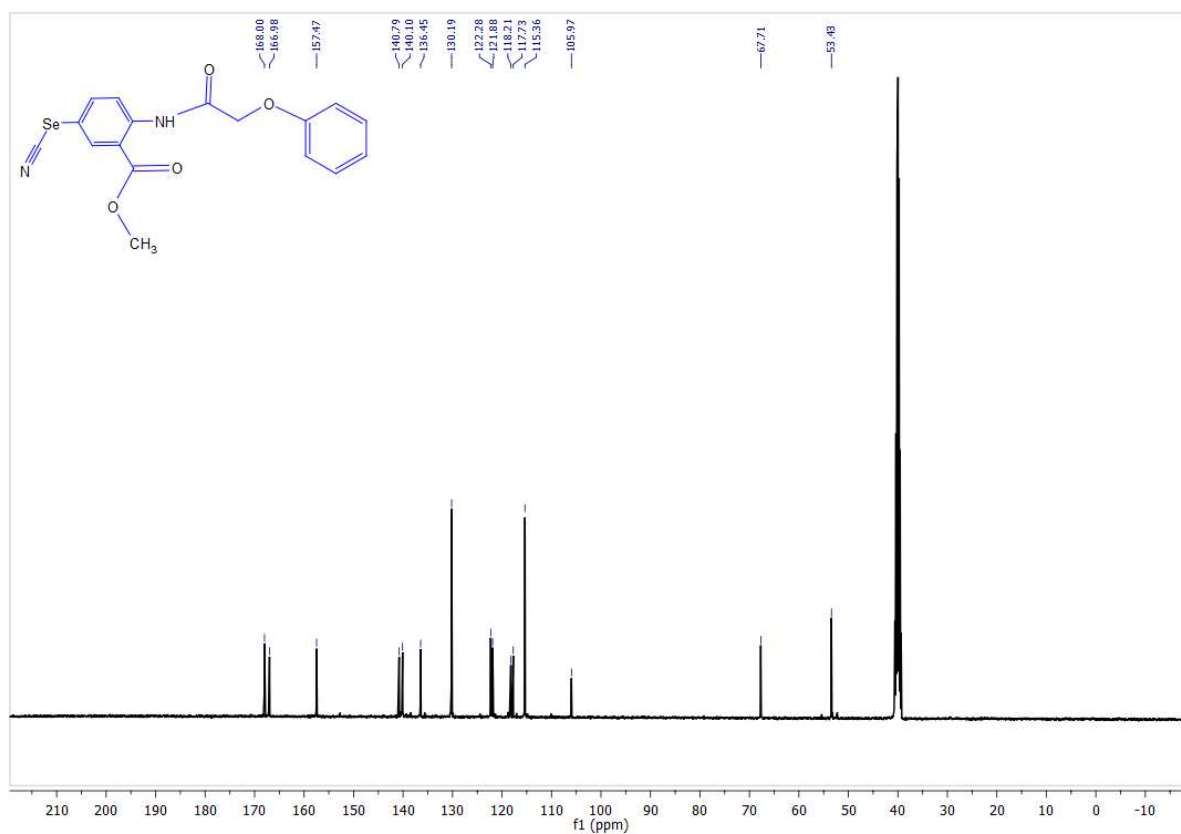

<sup>13</sup>CNMR chart of compound 15

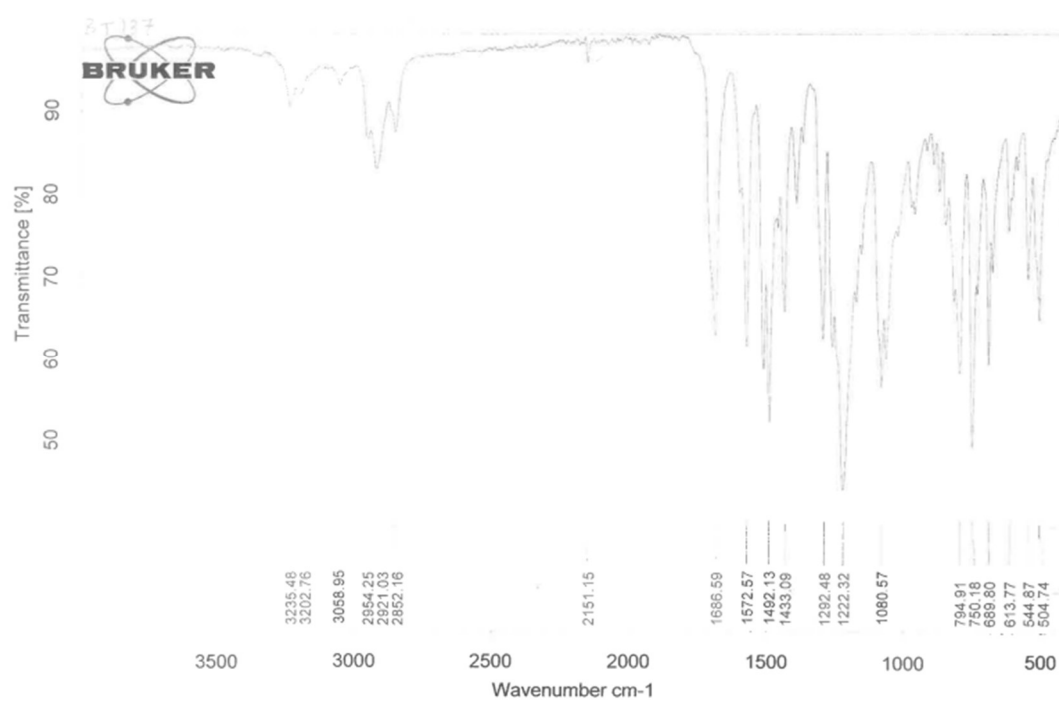

IR chart of compound 15

# Cairo University Micro Analytical Center

## DI Analysis Shimadzu Qp-2010 Plus

Analysed by  
Analysed  
Sample Name  
Sample ID  
Customer Name  
Data File  
Org Data File  
Method File  
Org Method File  
Report File  
Tuning File  
MSD/MS Modified by  
MSD/MS

Dr. Mai Younis  
06/01/2007 07:34:33 p  
B15  
Dr. Mohamed Soliman - Soliman - Cairo  
C:\GCMSolution\Data\Project1\B15.QGD  
C:\GCMSolution\Data\Project1\B15.QGD  
C:\GCMSolution\Data\Project1\High Temperature Op  
C:\GCMSolution\Data\Project1\High Temperature Op  
C:\GCMSolution\System\Tune1\_default.qpt  
Dr. Mai Younis  
06/01/2007 07:38:42 p

### Method

Analytical Line 1  
Inlet Source Temp 250.00 °C  
[MS Table]  
-Group 1 - Event 1-  
Start Time 0.00min  
End Time 10.00min  
ACQ Mode Scan  
Event Time 0.50sec  
Scan Speed 1000  
Start m/z 50.00  
End m/z 510.00  
Electron Voltage 70 eV  
Ionization Mode EI

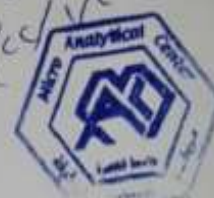

C:\GCMSolution\Data\Project1\B15.QGD

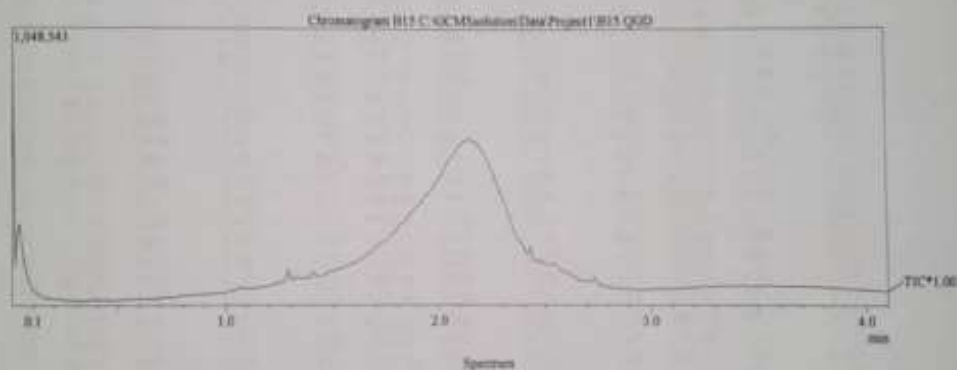

Line# 1 R.Time:2.1(Scan#:257)  
MassPeaks:227  
RawMode:Single 2.1(257) BasePeak:77(142487)  
BG Mode:None Group 1 - Event 1

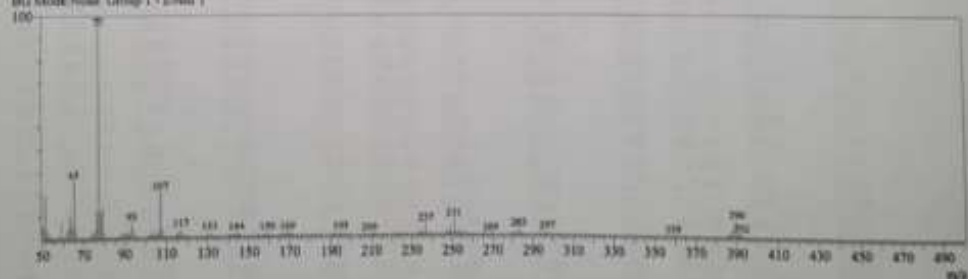

Mass Table  
Line# 1 R.Time:2.1(Scan#:257)  
MassPeaks:227  
RawMode:Single 2.1(257) BasePeak:77(142487)  
BG Mode:None Group 1 - Event 1

| # | m/z   | Abs. In | Rel. Int. | # | m/z   | Abs. In | Rel. Int. | # | m/z   | Abs. In | Rel. Int. |
|---|-------|---------|-----------|---|-------|---------|-----------|---|-------|---------|-----------|
| 1 | 50.05 | 8428    | 5.91      | 4 | 53.00 | 3036    | 2.13      | 7 | 56.05 | 372     | 0.26      |
| 2 | 51.00 | 27786   | 19.50     | 5 | 53.95 | 942     | 0.66      | 8 | 57.00 | 1505    | 1.06      |
| 3 | 52.00 | 5858    | 4.11      | 6 | 55.00 | 1492    | 1.05      | 9 | 58.05 | 1671    | 1.17      |

| #  | m/z    | Abs. In | Rel. Int. | #   | m/z    | Abs. In | Rel. Int. | #   | m/z    | Abs. In | Rel. Int. |
|----|--------|---------|-----------|-----|--------|---------|-----------|-----|--------|---------|-----------|
| 10 | 58.95  | 11759   | 8.25      | 79  | 131.15 | 3114    | 2.19      | 148 | 213.00 | 377     | 0.26      |
| 11 | 60.05  | 808     | 0.57      | 80  | 132.15 | 880     | 0.62      | 149 | 221.00 | 362     | 0.25      |
| 12 | 61.05  | 1790    | 1.26      | 81  | 133.05 | 527     | 0.37      | 150 | 222.00 | 508     | 0.36      |
| 13 | 62.05  | 6059    | 4.25      | 82  | 134.05 | 457     | 0.32      | 151 | 223.00 | 594     | 0.42      |
| 14 | 63.00  | 15769   | 11.07     | 83  | 135.15 | 527     | 0.37      | 152 | 224.05 | 690     | 0.48      |
| 15 | 64.05  | 8788    | 6.17      | 84  | 136.20 | 209     | 0.15      | 153 | 224.95 | 1163    | 0.82      |
| 16 | 65.00  | 36828   | 25.85     | 85  | 138.10 | 308     | 0.22      | 154 | 225.95 | 522     | 0.37      |
| 17 | 66.00  | 5129    | 3.60      | 86  | 139.05 | 714     | 0.50      | 155 | 227.10 | 460     | 0.32      |
| 18 | 67.00  | 774     | 0.54      | 87  | 140.10 | 766     | 0.54      | 156 | 228.10 | 231     | 0.16      |
| 19 | 68.15  | 372     | 0.26      | 88  | 141.05 | 1174    | 0.82      | 157 | 230.10 | 201     | 0.14      |
| 20 | 69.05  | 743     | 0.52      | 89  | 142.05 | 1167    | 0.82      | 158 | 231.10 | 241     | 0.17      |
| 21 | 70.10  | 423     | 0.30      | 90  | 143.05 | 1534    | 1.08      | 159 | 232.00 | 209     | 0.15      |
| 22 | 71.10  | 558     | 0.39      | 91  | 144.10 | 2622    | 1.84      | 160 | 233.00 | 1550    | 1.09      |
| 23 | 72.00  | 262     | 0.18      | 92  | 145.10 | 2066    | 1.45      | 161 | 234.05 | 1503    | 1.05      |
| 24 | 73.05  | 1357    | 0.95      | 93  | 146.20 | 546     | 0.38      | 162 | 235.05 | 3679    | 2.58      |
| 25 | 74.05  | 3740    | 2.62      | 94  | 147.20 | 308     | 0.22      | 163 | 236.05 | 850     | 0.60      |
| 26 | 75.05  | 5513    | 3.87      | 95  | 148.20 | 247     | 0.17      | 164 | 237.00 | 7031    | 4.93      |
| 27 | 76.05  | 16756   | 11.76     | 96  | 149.20 | 202     | 0.14      | 165 | 237.95 | 1013    | 0.71      |
| 28 | 77.00  | 142487  | 100.00    | 97  | 151.20 | 225     | 0.16      | 166 | 239.00 | 1758    | 1.23      |
| 29 | 78.05  | 16865   | 11.84     | 98  | 152.00 | 354     | 0.25      | 167 | 240.00 | 534     | 0.37      |
| 30 | 79.05  | 19257   | 13.51     | 99  | 152.95 | 363     | 0.25      | 168 | 241.00 | 412     | 0.29      |
| 31 | 80.05  | 2538    | 1.78      | 100 | 154.05 | 464     | 0.33      | 169 | 242.05 | 449     | 0.32      |
| 32 | 81.10  | 719     | 0.50      | 101 | 155.05 | 533     | 0.37      | 170 | 243.05 | 675     | 0.47      |
| 33 | 82.10  | 450     | 0.32      | 102 | 156.05 | 445     | 0.31      | 171 | 245.00 | 390     | 0.27      |
| 34 | 83.10  | 543     | 0.38      | 103 | 157.10 | 998     | 0.70      | 172 | 246.00 | 270     | 0.19      |
| 35 | 84.10  | 201     | 0.14      | 104 | 158.15 | 1025    | 0.72      | 173 | 247.00 | 2118    | 1.49      |
| 36 | 85.10  | 450     | 0.32      | 105 | 159.05 | 2256    | 1.58      | 174 | 248.00 | 2050    | 1.44      |
| 37 | 86.15  | 389     | 0.27      | 106 | 160.05 | 413     | 0.29      | 175 | 249.05 | 5045    | 3.54      |
| 38 | 87.10  | 1650    | 1.16      | 107 | 161.10 | 218     | 0.15      | 176 | 250.05 | 1153    | 0.81      |
| 39 | 88.10  | 2308    | 1.62      | 108 | 162.10 | 308     | 0.22      | 177 | 251.05 | 10186   | 7.15      |
| 40 | 89.05  | 3385    | 2.38      | 109 | 163.10 | 215     | 0.15      | 178 | 251.95 | 1952    | 1.37      |
| 41 | 90.05  | 3136    | 2.20      | 110 | 164.05 | 401     | 0.28      | 179 | 253.05 | 2672    | 1.88      |
| 42 | 91.05  | 4361    | 3.06      | 111 | 165.05 | 776     | 0.54      | 180 | 254.05 | 1349    | 0.95      |
| 43 | 92.05  | 2953    | 2.07      | 112 | 166.05 | 1366    | 0.96      | 181 | 255.00 | 633     | 0.44      |
| 44 | 93.05  | 9815    | 6.89      | 113 | 167.05 | 1574    | 1.10      | 182 | 256.05 | 2394    | 1.68      |
| 45 | 94.05  | 5671    | 3.98      | 114 | 168.05 | 1955    | 1.37      | 183 | 256.95 | 469     | 0.33      |
| 46 | 95.05  | 1566    | 1.10      | 115 | 169.00 | 2388    | 1.68      | 184 | 258.00 | 478     | 0.34      |
| 47 | 96.00  | 340     | 0.24      | 116 | 170.00 | 2135    | 1.50      | 185 | 259.00 | 246     | 0.17      |
| 48 | 97.00  | 322     | 0.23      | 117 | 171.10 | 1388    | 0.97      | 186 | 263.00 | 247     | 0.17      |
| 49 | 98.00  | 201     | 0.14      | 118 | 172.05 | 487     | 0.34      | 187 | 264.00 | 249     | 0.17      |
| 50 | 99.00  | 348     | 0.24      | 119 | 173.10 | 201     | 0.14      | 188 | 265.15 | 503     | 0.35      |
| 51 | 100.05 | 304     | 0.21      | 120 | 175.10 | 217     | 0.15      | 189 | 266.05 | 501     | 0.35      |
| 52 | 101.15 | 1348    | 0.95      | 121 | 176.15 | 1256    | 0.88      | 190 | 267.10 | 828     | 0.58      |
| 53 | 102.15 | 1615    | 1.13      | 122 | 177.10 | 274     | 0.19      | 191 | 268.10 | 217     | 0.15      |
| 54 | 103.15 | 3794    | 2.66      | 123 | 178.10 | 258     | 0.18      | 192 | 269.15 | 966     | 0.68      |
| 55 | 104.10 | 2191    | 1.54      | 124 | 179.00 | 250     | 0.18      | 193 | 270.10 | 201     | 0.14      |
| 56 | 105.15 | 2884    | 2.02      | 125 | 180.00 | 500     | 0.35      | 194 | 271.10 | 228     | 0.16      |
| 57 | 106.15 | 3568    | 2.50      | 126 | 181.05 | 317     | 0.22      | 195 | 279.15 | 853     | 0.60      |
| 58 | 107.10 | 29057   | 20.39     | 127 | 182.05 | 726     | 0.51      | 196 | 280.15 | 871     | 0.61      |
| 59 | 108.10 | 6169    | 4.33      | 128 | 183.05 | 339     | 0.24      | 197 | 281.10 | 2137    | 1.50      |
| 60 | 109.10 | 1142    | 0.80      | 129 | 184.00 | 407     | 0.29      | 198 | 282.15 | 432     | 0.30      |
| 61 | 110.05 | 474     | 0.33      | 130 | 185.00 | 204     | 0.14      | 199 | 283.10 | 3866    | 2.71      |
| 62 | 111.00 | 305     | 0.21      | 131 | 186.00 | 470     | 0.33      | 200 | 284.00 | 772     | 0.54      |
| 63 | 112.15 | 295     | 0.21      | 132 | 190.15 | 315     | 0.22      | 201 | 285.05 | 731     | 0.51      |
| 64 | 113.10 | 1487    | 1.04      | 133 | 191.10 | 1260    | 0.88      | 202 | 290.00 | 206     | 0.14      |
| 65 | 114.15 | 830     | 0.58      | 134 | 192.05 | 630     | 0.44      | 203 | 293.20 | 505     | 0.35      |
| 66 | 115.15 | 2229    | 1.56      | 135 | 193.00 | 1129    | 0.79      | 204 | 294.15 | 360     | 0.25      |
| 67 | 116.15 | 3472    | 2.44      | 136 | 194.05 | 646     | 0.45      | 205 | 295.20 | 1209    | 0.85      |
| 68 | 117.10 | 5324    | 3.74      | 137 | 195.05 | 2116    | 1.49      | 206 | 296.20 | 231     | 0.16      |
| 69 | 118.10 | 1666    | 1.17      | 138 | 196.10 | 863     | 0.61      | 207 | 297.15 | 2131    | 1.50      |
| 70 | 119.05 | 1238    | 0.87      | 139 | 197.05 | 720     | 0.51      | 208 | 298.15 | 378     | 0.27      |
| 71 | 120.10 | 858     | 0.60      | 140 | 198.05 | 595     | 0.42      | 209 | 299.20 | 361     | 0.25      |
| 72 | 121.10 | 558     | 0.39      | 141 | 199.10 | 310     | 0.22      | 210 | 355.20 | 329     | 0.23      |
| 73 | 122.10 | 226     | 0.16      | 142 | 207.10 | 537     | 0.38      | 211 | 356.20 | 210     | 0.15      |
| 74 | 123.05 | 417     | 0.29      | 143 | 208.10 | 623     | 0.44      | 212 | 357.10 | 455     | 0.32      |
| 75 | 127.10 | 378     | 0.27      | 144 | 209.05 | 1087    | 0.76      | 213 | 358.10 | 247     | 0.17      |
| 76 | 128.10 | 394     | 0.28      | 145 | 210.00 | 614     | 0.43      | 214 | 359.15 | 487     | 0.34      |
| 77 | 129.15 | 847     | 0.59      | 146 | 211.00 | 1426    | 1.00      | 215 | 360.10 | 281     | 0.20      |
| 78 | 130.15 | 1054    | 0.74      | 147 | 211.95 | 492     | 0.35      | 216 | 361.10 | 252     | 0.18      |

| #   | m/z    | Abs. Int. | Rel. Int. | #   | m/z    | Abs. Int. | Rel. Int. | #   | m/z    | Abs. Int. | Rel. Int. |
|-----|--------|-----------|-----------|-----|--------|-----------|-----------|-----|--------|-----------|-----------|
| 217 | 362.10 | 298       | 0.21      | 221 | 387.25 | 2063      | 1.45      | 225 | 391.20 | 2474      | 1.74      |
| 218 | 364.15 | 540       | 0.38      | 222 | 388.25 | 5364      | 3.76      | 226 | 392.25 | 2034      | 1.43      |
| 219 | 365.10 | 271       | 0.19      | 223 | 389.25 | 1464      | 1.03      | 227 | 393.20 | 457       | 0.32      |
| 220 | 386.25 | 2015      | 1.41      | 224 | 390.25 | 10615     | 7.45      |     |        |           |           |

Mass chart of compound 15
